# Supplementary material for: Computational Prediction of Chiral Iron Complexes for Asymmetric Transfer Hydrogenation of Pyruvic Acid to Lactic Acid
Source: MDPI journal article supplement (doi:10.3390/molecules25081892), 2020-04-20
Supplement: s1 [file s1]

# Supplementary Information

## Computational prediction of chiral iron complexes for asymmetric transfer hydrogenation of pyruvic acid to lactic acid

Wan Wang<sup>1,2,3</sup> and Xinzheng Yang<sup>1,2,3,\*</sup>

<sup>1</sup> State Key Laboratory for Structural Chemistry of Unstable and Stable Species, Institute of Chemistry Chinese Academy of Sciences, Beijing 100190, China

<sup>2</sup> University of Chinese Academy of Sciences, Beijing 100049, China

<sup>3</sup> Beijing National Laboratory for Molecular Sciences, CAS Research/Education Center for Excellence in Molecular Sciences, Beijing 100190, China

\* Correspondence: xyang@iccas.ac.cn

### 1. Evaluation of basis set

In order to evaluate the influential of the basis set superposition errors (BSSE) on enantio-determining step (EDS) of our iron catalytic system, we calculated singlet point energies of the enantio-determining transition states **TS<sub>2,3-R</sub>** and **TS<sub>2,3-S</sub>** with extended basis sets (def2-TZVP for main group and def2-QZVP for Fe)[1-3]. The absolute free energies are obtained by adding the free energy corrections calculated by using small basis sets (6-31G(d)/ECP10MDF) to the corresponding electronic energies calculated by using extended basis sets (def2-TZVP/def2-QZVP):

$$G_{\text{extended}} = E_{\text{extended}} + G_{\text{correction}}(\text{small basis set})$$

As shown in Table S1, the free energy difference between **TS<sub>2,3-R</sub>** and **TS<sub>2,3-S</sub>** with extended basis set is 3.3 kcal mol<sup>-1</sup>, which is only 0.1 kcal mol<sup>-1</sup> larger than the relative free energy with small basis set. Such results indicate that the BSSE of 6-31G(d)/ECP10MDF basis sets is negligible for this iron based catalytic system.

**Table S1.** Absolute and relative energies of **TS<sub>2,3-R</sub>** and **TS<sub>2,3-S</sub>** with different basis set.

| Basis set           | <b>TS<sub>2,3-R</sub></b><br>(a.u.) | <b>TS<sub>2,3-S</sub></b><br>(a.u.) | $\Delta G$ (EDS)<br>(kcal mol <sup>-1</sup> ) |
|---------------------|-------------------------------------|-------------------------------------|-----------------------------------------------|
| 6-31G(d)/ECP10MDF   | -2475.934071                        | -2475.929023                        | 3.2                                           |
| def2-TZVP/def2-QZVP | -3616.541443                        | -3616.536225                        | 3.3                                           |

**Reference:**

1. Pritchard, B. P.; Altarawy, D.; Didier, B.; Gibson, T. D.; Windus, T. L., New basis set exchange: An open, up-to-date resource for the molecular sciences community. *J. Chem. Inf. Model.*, **2019**, 59, 4814-4820.
2. Schuchardt, K. L.; Didier, B. T.; Elsethagen, T.; Sun, L.; Gurumoorthi, V.; Chase, J.; Li, J.; Windus, T. L., Basis set exchange: A community database for computational sciences. *J. Chem. Inf. Model.*, **2007**, 47, 1045-1052.
3. Feller, D., The role of databases in support of computational chemistry calculations. *J. Comput. Chem.*, **1996**, 17, 1571-1586.
