# Supplementary material for: Computational Prediction of Chiral Iron Complexes for Asymmetric Transfer Hydrogenation of Pyruvic Acid to Lactic Acid
Source: Molecules. 2020 Apr 20;25(8):1892. doi: 10.3390/molecules25081892 (PMC7221593; doi:10.3390/molecules25081892)
Supplement: Supplementary file 1 [file molecules-25-01892-s001.zip › optmized structures.xyz]

3
CO2 Gsolv= -188.492992
C    0.000000    0.000000    0.000000
O    0.000000    0.000000    1.164312
O    0.000000    0.000000   -1.164312
5
FA Gsolv= -189.653117
H    0.092920    1.500881   -0.000013
C    0.125100    0.400024   -0.000024
O   -1.109640   -0.091660    0.000011
O    1.136349   -0.262265    0.000004
H   -1.057189   -1.069627    0.000035
4
HCOO- Gsolv= -189.195720
C    0.000000    0.330930    0.000000
O    1.127222   -0.215314    0.000000
H   -0.000003    1.459485    0.000000
O   -1.127222   -0.215319    0.000000
10
PA Gsolv= -342.173308
C   -1.748776    0.765665    0.000123
C   -0.705944   -0.290502   -0.000023
C    0.742623    0.221000   -0.000074
O   -0.916459   -1.484822   -0.000143
O    1.613121   -0.777491    0.000130
O    1.022212    1.399023   -0.000132
H   -1.626823    1.412011   -0.879789
H   -1.626527    1.411827    0.879994
H   -2.743772    0.312282    0.000395
H    2.518705   -0.406774    0.000408
12
D-LA Gsolv= -343.357945
H   -0.781553   -0.237161   -1.472538
H   -0.764498    1.920681   -0.633544
C   -0.685002   -0.011654   -0.395759
O   -1.215744    1.255610   -0.090170
C    0.792593   -0.138900   -0.088066
O    1.416398   -1.166356   -0.267546
O    1.336359    0.980537    0.386904
H    2.286827    0.813915    0.547302
C   -1.455031   -1.043435    0.403069
H   -2.517318   -0.998332    0.137281
H   -1.080613   -2.051303    0.194761
H   -1.354312   -0.842194    1.477769
12
L-LA Gsolv= -343.357967
H   -0.781675   -0.238365    1.472438
H   -0.766701    1.919829    0.635842
C   -0.685045   -0.012126    0.395840
O   -1.216427    1.255024    0.090899
C    0.792683   -0.138449    0.088199
C   -1.454276   -1.043838   -0.403872
H   -1.353447   -0.841761   -1.478410
H   -1.079265   -2.051627   -0.196225
H   -2.516661   -0.999606   -0.138316
O    1.417173   -1.165357    0.268601
O    1.335672    0.980762   -0.388002
H    2.286235    0.814581   -0.548318
70
1 Gsolv= -1944.118152
 O     -0.830046   -2.701594   -1.312275
 O      0.672724   -1.267007   -2.717287
 S      0.286264   -1.736694   -1.367454
 N     -0.035855   -0.537914   -0.339693
 C      0.820849    0.647200   -0.508938
 H      0.860173    0.937024   -1.577014
 C      0.150208    1.819302    0.227419
 H      0.074915    1.552683    1.294403
 N     -1.225280    1.919304   -0.276060
 C      0.962622    3.086902    0.103963
 C      1.668615    3.573198    1.205687
 H      1.597620    3.047136    2.159216
 C      2.464625    4.709959    1.096845
 H      3.008952    5.075128    1.966872
 C      2.562854    5.377476   -0.120563
 H      3.184279    6.267531   -0.208871
 C      1.860891    4.901540   -1.225836
 H      1.933872    5.417621   -2.182355
 C      1.068232    3.763536   -1.114675
 H      0.534625    3.397013   -1.993403
 C      2.242902    0.457208   -0.029106
 C      3.311742    0.828996   -0.844497
 H      3.108788    1.231499   -1.838956
 C      4.626078    0.683552   -0.405956
 H      5.450095    0.976055   -1.055721
 C      4.883777    0.157278    0.856354
 H      5.910089    0.035895    1.200547
 C      3.821037   -0.216583    1.678494
 H      4.016006   -0.631540    2.667052
 C      2.510389   -0.062590    1.239925
 H      1.681691   -0.363528    1.883242
 C     -4.186157   -0.214898    0.170412
 C     -3.636026   -1.534813    0.277513
 H     -3.951333   -2.295973   -0.435540
 C     -2.687684   -1.845065    1.265472
 H     -2.238113   -2.837852    1.280328
 C     -2.172102   -0.844183    2.116426
 C     -2.727718    0.452638    2.024377
 H     -2.326281    1.247061    2.653375
 C     -3.758984    0.744056    1.111029
 H     -4.122015    1.768443    1.037118
 H     -2.258156   -0.186751   -1.585595
 C      1.696132   -2.626746   -0.723027
 C      1.533032   -3.347704    0.459007
 C      2.925807   -2.565777   -1.367968
 C      2.626743   -4.005326    1.007900
 H      0.557586   -3.392171    0.944377
 C      4.016200   -3.229981   -0.811055
 H      3.027924   -2.001941   -2.293493
 C      3.868455   -3.941540    0.376003
 H      2.511073   -4.570759    1.931046
 H      4.984997   -3.185211   -1.306131
 H     -1.224394    2.218880   -1.253061
 H     -1.744574    2.624655    0.248622
 C     -1.064284   -1.147413    3.071189
 H     -1.449222   -1.647086    3.971866
 H     -0.323775   -1.820975    2.617302
 H     -0.552771   -0.231769    3.394284
 C     -5.259939    0.058760   -0.852941
 H     -5.076150   -0.629942   -1.694222
 C     -6.621771   -0.277685   -0.247947
 H     -7.421140   -0.141460   -0.988939
 H     -6.661328   -1.316507    0.107918
 H     -6.836450    0.382068    0.606438
 C     -5.245987    1.482266   -1.388693
 H     -4.258002    1.760110   -1.783789
 H     -5.976863    1.584152   -2.201790
 H     -5.521531    2.211529   -0.613374
 Fe    -2.049311   -0.133130   -0.046834
 H      4.724548   -4.454839    0.811081
85
2R Gsolv= -2475.940345
 O     -1.170441   -2.352810   -1.567759
 O      0.086510   -0.385069   -2.464534
 S     -0.004650   -1.454901   -1.445805
 N      0.046648   -0.911032    0.073149
 C      1.092930    0.093409    0.327531
 H      1.139354    0.823234   -0.503699
 C      0.681314    0.900187    1.577668
 H      0.648121    0.203956    2.432506
 N     -0.687789    1.376382    1.365130
 C      1.699244    1.977852    1.865305
 C      2.620060    1.819031    2.901703
 H      2.549875    0.943418    3.549896
 C      3.640976    2.746137    3.093200
 H      4.355463    2.605199    3.903324
 C      3.754089    3.845470    2.245970
 H      4.558397    4.565939    2.388471
 C      2.830716    4.020496    1.216995
 H      2.907322    4.875743    0.545381
 C      1.806958    3.096468    1.035274
 H      1.095902    3.240664    0.221289
 C      2.479885   -0.484383    0.531921
 C      3.601332    0.165274    0.010977
 H      3.468735    1.060875   -0.598017
 C      4.882826   -0.321166    0.253564
 H      5.745972    0.197783   -0.162046
 C      5.059437   -1.474713    1.013148
 H      6.060500   -1.862662    1.197571
 C      3.946278   -2.132263    1.532971
 H      4.074640   -3.037596    2.125851
 C      2.667569   -1.635215    1.299192
 H      1.796917   -2.157076    1.699725
 C     -3.934725   -0.860039    0.940597
 C     -3.289840   -2.124560    0.871901
 H     -3.512686   -2.798917    0.047958
 C     -2.264348   -2.455018    1.768669
 H     -1.690696   -3.369254    1.610806
 C     -1.884737   -1.579543    2.815470
 C     -2.599107   -0.370311    2.948728
 H     -2.294603    0.337915    3.719765
 C     -3.592056   -0.001736    2.024349
 H     -4.069235    0.975836    2.094986
 H     -2.178703    0.184654   -0.554903
 C      1.427553   -2.493688   -1.683946
 C      1.409375   -3.774256   -1.134837
 C      2.554061   -1.998186   -2.331912
 C      2.542553   -4.571607   -1.238108
 H      0.516335   -4.138896   -0.627077
 C      3.686501   -2.803204   -2.424144
 H      2.550894   -0.989506   -2.745482
 C      3.681336   -4.083869   -1.877823
 H      2.539230   -5.575358   -0.816423
 H      4.577739   -2.424511   -2.922269
 H     -0.718027    2.068644    0.610955
 H     -1.039751    1.835532    2.205994
 C     -1.726873    2.511419   -2.000176
 O     -0.804992    2.934016   -1.323347
 C     -3.131492    2.434602   -1.384295
 O     -3.164008    2.920839   -0.152091
 O     -4.084535    2.016499   -2.002080
 C     -1.623817    2.094971   -3.415485
 H     -2.030001    1.081618   -3.537414
 H     -2.245445    2.758266   -4.034022
 H     -0.581759    2.131093   -3.747659
 H      3.467947    3.386568   -2.569159
 C      2.430441    3.026436   -2.477507
 O      1.613175    4.019199   -2.167646
 O      2.091569    1.873468   -2.644426
 H      0.701888    3.645230   -2.041488
 H     -4.081834    2.863137    0.183812
 C     -0.782501   -1.944134    3.755915
 H      0.007546   -2.507772    3.241391
 H     -0.334775   -1.053707    4.215788
 H     -1.157960   -2.582183    4.569367
 C     -5.051186   -0.475823    0.001338
 H     -5.054989    0.625575   -0.059434
 C     -4.899099   -1.030297   -1.408140
 H     -5.670949   -0.600821   -2.060993
 H     -3.916971   -0.793719   -1.842360
 H     -5.027932   -2.122347   -1.429807
 C     -6.379193   -0.923804    0.611495
 H     -6.536247   -0.486055    1.606956
 H     -7.220106   -0.624649   -0.028800
 H     -6.406569   -2.019203    0.714445
 Fe    -1.829180   -0.458095    0.822360
 H      4.570550   -4.707955   -1.951618
85
2S Gsolv= -2475.941943
 O      1.394257   -1.678709    2.069985
 O      0.074031    0.436416    2.286369
 S      0.193499   -0.911047    1.684014
 N      0.097141   -0.911231    0.072552
 C     -1.024581   -0.117118   -0.457622
 H     -1.164674    0.800218    0.144288
 C     -0.656470    0.355642   -1.881678
 H     -0.582638   -0.536206   -2.526363
 N      0.683085    0.948086   -1.831795
 C     -1.739145    1.260790   -2.421735
 C     -2.649258    0.790423   -3.369289
 H     -2.528280   -0.216880   -3.772610
 C     -3.722343    1.579138   -3.776370
 H     -4.427386    1.194950   -4.512561
 C     -3.899150    2.851017   -3.237897
 H     -4.743854    3.464429   -3.548537
 C     -2.987813    3.335204   -2.301395
 H     -3.113151    4.328763   -1.870680
 C     -1.913347    2.547076   -1.903857
 H     -1.212995    2.936855   -1.164980
 C     -2.347716   -0.856597   -0.506486
 C     -3.535645   -0.203897   -0.169483
 H     -3.497898    0.823783    0.197015
 C     -4.762188   -0.850817   -0.291699
 H     -5.679071   -0.326654   -0.023771
 C     -4.816318   -2.165111   -0.748213
 H     -5.774616   -2.674590   -0.841672
 C     -3.635668   -2.827141   -1.078882
 H     -3.667937   -3.857530   -1.431827
 C     -2.412204   -2.174335   -0.962545
 H     -1.487719   -2.696086   -1.215653
 C      4.063546   -0.791654   -0.934416
 C      3.566251   -2.004747   -0.379190
 H      3.884996   -2.313464    0.614042
 C      2.582686   -2.747808   -1.047887
 H      2.131679   -3.605714   -0.547773
 C      2.070890   -2.339418   -2.301930
 C      2.619363   -1.177548   -2.888540
 H      2.208274   -0.818708   -3.832620
 C      3.601147   -0.418484   -2.225677
 H      3.955879    0.516062   -2.661414
 H      2.248194    0.447017    0.288858
 C     -1.197178   -1.855566    2.284005
 C     -1.159851   -3.240922    2.133325
 C     -2.314336   -1.213626    2.806450
 C     -2.264007   -3.993307    2.513084
 H     -0.276352   -3.722135    1.713332
 C     -3.416170   -1.977453    3.183861
 H     -2.330244   -0.128503    2.902570
 C     -3.391652   -3.361178    3.036416
 H     -2.246709   -5.075963    2.399798
 H     -4.298958   -1.486154    3.589907
 H      0.673810    1.822963   -1.299944
 H      1.004911    1.171690   -2.774239
 C      1.723683    3.011836    1.001365
 O      0.703309    3.150787    0.347248
 C      1.617646    2.741035    2.505702
 H     -3.589563    3.859950    1.568288
 C     -2.569989    3.447722    1.500957
 O     -1.738975    4.332716    0.974570
 O     -2.257389    2.334489    1.865905
 H     -0.840664    3.917632    0.909727
 C      3.092397    3.118837    0.446782
 H      3.771452    2.385658    0.895030
 H      3.074441    3.032704   -0.645061
 H      3.478005    4.115409    0.717797
 O      2.483504    2.160157    3.120335
 O      0.493022    3.222153    3.005768
 H      0.446048    3.003361    3.958950
 C      0.998847   -3.125901   -2.984134
 H      1.435199   -3.883247   -3.651874
 H      0.372969   -3.657966   -2.255432
 H      0.353635   -2.483113   -3.597622
 C      5.148915    0.011163   -0.260816
 H      5.017446    1.057833   -0.583263
 C      5.106487   -0.036286    1.260265
 H      5.836011    0.672651    1.674861
 H      4.114548    0.222194    1.660633
 H      5.374749   -1.032487    1.641161
 C      6.505780   -0.474711   -0.770244
 H      6.581917   -0.391797   -1.863081
 H      7.320129    0.113648   -0.326072
 H      6.664045   -1.529230   -0.497875
 Fe     1.934799   -0.593122   -0.822473
 H     -4.257682   -3.953020    3.328646
85
3R Gsolv= -2475.982223
 O     -0.800546   -2.276809   -1.694130
 O      0.652059   -0.394583   -2.496023
 S      0.384091   -1.430799   -1.483058
 N      0.276130   -0.777354    0.008591
 C      1.179681    0.376401    0.234850
 H      1.016467    1.131893   -0.550548
 C      0.734554    0.987492    1.562865
 H      0.954317    0.274563    2.374399
 N     -0.741591    1.075950    1.478353
 C      1.429230    2.295135    1.843692
 C      2.354521    2.380924    2.884367
 H      2.527037    1.511183    3.520348
 C      3.063483    3.559121    3.105706
 H      3.782388    3.612105    3.922186
 C      2.857696    4.663195    2.283265
 H      3.415618    5.582944    2.453368
 C      1.935829    4.585250    1.241194
 H      1.766674    5.438943    0.584676
 C      1.226209    3.409965    1.024276
 H      0.511533    3.366826    0.203896
 C      2.648371    0.027784    0.262765
 C      3.538806    0.715696   -0.561796
 H      3.153785    1.478470   -1.242478
 C      4.899534    0.417791   -0.534612
 H      5.585273    0.958475   -1.185733
 C      5.379227   -0.573542    0.316158
 H      6.441843   -0.812268    0.333885
 C      4.494640   -1.262597    1.145635
 H      4.865073   -2.040721    1.812294
 C      3.138255   -0.958713    1.122892
 H      2.447257   -1.504745    1.768449
 C     -3.633654   -1.335014    0.899095
 C     -2.787560   -2.384232    0.502449
 H     -2.925748   -2.874791   -0.456591
 C     -1.737067   -2.834185    1.340148
 H     -1.099223   -3.642686    0.986648
 C     -1.514784   -2.282407    2.619375
 C     -2.237893   -1.121031    2.930322
 H     -1.992959   -0.553279    3.827541
 C     -3.267781   -0.639038    2.068140
 H     -3.794549    0.276836    2.338669
 H     -2.129771    0.606505   -1.282564
 C      1.790958   -2.526886   -1.474058
 C      1.764918   -3.633127   -0.626788
 C      2.881135   -2.265876   -2.296107
 C      2.860945   -4.485314   -0.596166
 H      0.902476   -3.819547    0.012331
 C      3.974746   -3.127565   -2.257182
 H      2.876355   -1.395395   -2.949321
 C      3.965669   -4.230227   -1.408155
 H      2.854399   -5.351139    0.063572
 H      4.837172   -2.931467   -2.891925
 H     -1.009496    1.732943    0.725271
 H     -1.140347    1.414586    2.357530
 C     -2.233418    1.660264   -1.633276
 O     -1.279096    2.412887   -0.937270
 H      1.983545    4.519087   -2.744842
 C      1.153404    3.809741   -2.496803
 O      0.083173    4.353760   -2.100899
 O      1.378360    2.591416   -2.643529
 H     -0.878530    3.139688   -1.500276
 C     -3.639067    2.047975   -1.210874
 C     -0.394758   -2.770238    3.476877
 H     -0.050996   -1.993249    4.169819
 H     -0.719012   -3.634171    4.073607
 H      0.453764   -3.099556    2.861884
 C     -4.822106   -0.896496    0.083846
 H     -4.919932    0.192962    0.208801
 C     -4.712204   -1.221386   -1.398945
 H     -5.538622   -0.748509   -1.944727
 H     -3.768600   -0.866719   -1.839961
 H     -4.780848   -2.304287   -1.576279
 C     -6.069657   -1.547561    0.684327
 H     -6.200735   -1.276350    1.740536
 H     -6.965644   -1.229228    0.135111
 H     -6.001677   -2.643516    0.618344
 Fe    -1.393177   -0.718404    0.988485
 O     -4.619465    1.995788   -1.924797
 O     -3.698705    2.393901    0.081474
 H     -4.631441    2.595263    0.297787
 C     -2.058203    1.726892   -3.133271
 H     -1.030330    1.448271   -3.393633
 H     -2.752272    1.050403   -3.645145
 H     -2.241941    2.749069   -3.492712
 H      4.824870   -4.898309   -1.378346
85
3S Gsolv= -2475.983624
 O      0.915615   -2.133777    1.714819
 O     -0.657791   -0.302359    2.408882
 S     -0.302300   -1.356876    1.443151
 N     -0.188907   -0.743141   -0.069114
 C     -1.141657    0.362133   -0.335628
 H     -1.006003    1.147824    0.423743
 C     -0.743115    0.945782   -1.691483
 H     -0.987739    0.214426   -2.478291
 N      0.730963    1.054196   -1.674949
 C     -1.458085    2.244426   -1.967894
 C     -2.492018    2.283451   -2.904286
 H     -2.734737    1.383306   -3.471309
 C     -3.218636    3.453553   -3.108872
 H     -4.023148    3.469049   -3.842876
 C     -2.920181    4.598247   -2.374943
 H     -3.490721    5.512617   -2.531643
 C     -1.888430    4.568110   -1.439303
 H     -1.645237    5.454815   -0.853603
 C     -1.162450    3.399692   -1.237361
 H     -0.361681    3.399526   -0.497836
 C     -2.596199   -0.043863   -0.346424
 C     -3.515591    0.659964    0.431376
 H     -3.162736    1.476421    1.065683
 C     -4.866810    0.321132    0.405616
 H     -5.575843    0.875605    1.019090
 C     -5.308003   -0.725617   -0.398437
 H     -6.363422   -0.994375   -0.416140
 C     -4.394639   -1.429846   -1.183043
 H     -4.734776   -2.250559   -1.813765
 C     -3.047532   -1.087252   -1.159453
 H     -2.333517   -1.645478   -1.768652
 C      3.780543   -0.991435   -1.117321
 C      3.110096   -2.004840   -0.409862
 H      3.386861   -2.246904    0.613476
 C      2.060672   -2.744374   -1.016136
 H      1.572672   -3.523444   -0.434047
 C      1.655229   -2.513858   -2.347795
 C      2.172937   -1.365917   -2.964777
 H      1.772717   -1.031885   -3.921495
 C      3.208876   -0.607450   -2.346437
 H      3.578112    0.282470   -2.856462
 H      2.785597    0.885048    0.747142
 C     -1.643938   -2.533019    1.438043
 C     -1.517377   -3.676708    0.651620
 C     -2.780135   -2.299137    2.203918
 C     -2.561857   -4.591511    0.618431
 H     -0.614548   -3.849394    0.065894
 C     -3.819322   -3.225790    2.166448
 H     -2.852744   -1.401206    2.814350
 C     -3.712877   -4.363689    1.372159
 H     -2.477532   -5.486490    0.004549
 H     -4.716722   -3.051909    2.757745
 H      1.027971    1.750289   -0.970837
 H      1.087843    1.337770   -2.590398
 C      2.448749    1.712602    1.397305
 O      1.345699    2.292758    0.760754
 C      2.089017    1.087135    2.729918
 H     -1.605487    4.896946    2.566934
 C     -0.947891    4.069910    2.194857
 O      0.200068    4.433586    1.808360
 O     -1.417633    2.915520    2.210218
 H      0.989647    3.089254    1.258802
 C      3.571646    2.712315    1.624608
 H      4.434389    2.247360    2.119966
 H      3.895713    3.131404    0.664161
 H      3.206257    3.533961    2.258004
 O      2.573644    0.052823    3.147619
 O      1.238641    1.838650    3.425365
 H      1.060594    1.399270    4.280886
 C      0.555509   -3.305718   -2.971904
 H      0.970224   -4.157506   -3.529012
 H     -0.125554   -3.710462   -2.212758
 H     -0.022249   -2.696728   -3.678420
 C      4.959249   -0.220419   -0.572531
 H      4.696970    0.850998   -0.624585
 C      5.320673   -0.575608    0.860176
 H      6.158626    0.049718    1.194499
 H      4.488689   -0.426768    1.562404
 H      5.644299   -1.624488    0.934805
 C      6.161740   -0.453715   -1.489491
 H      5.959648   -0.152960   -2.525562
 H      7.025190    0.122757   -1.132594
 H      6.442616   -1.517019   -1.491822
 Fe     1.480308   -0.648414   -1.038761
 H     -4.530932   -5.081580    1.341103
69
4 Gsolv= -1943.421081
 O     -0.950816   -2.503576   -1.481727
 O      0.741635   -1.103880   -2.700600
 S      0.227027   -1.626564   -1.422994
 N     -0.104165   -0.405215   -0.393564
 C      0.794577    0.765754   -0.511685
 H      0.773459    1.147748   -1.547522
 C      0.191743    1.838302    0.391179
 H      0.289092    1.512021    1.438765
 N     -1.262017    1.826655    0.108872
 C      0.843568    3.185782    0.229844
 C      1.575980    3.728598    1.286304
 H      1.649711    3.176643    2.224560
 C      2.212597    4.958641    1.147483
 H      2.781099    5.370954    1.979787
 C      2.120231    5.658000   -0.052022
 H      2.615977    6.621292   -0.162614
 C      1.393333    5.121443   -1.112649
 H      1.321622    5.663087   -2.054666
 C      0.762008    3.889925   -0.975087
 H      0.204913    3.475222   -1.816953
 C      2.230707    0.495264   -0.130292
 C      3.257573    0.800918   -1.021982
 H      3.007646    1.217342   -1.999571
 C      4.587207    0.567522   -0.677449
 H      5.380734    0.807077   -1.383888
 C      4.897977    0.022892    0.564680
 H      5.936000   -0.166890    0.834427
 C      3.876411   -0.278261    1.465494
 H      4.114991   -0.704326    2.439393
 C      2.551224   -0.038833    1.121070
 H      1.753756   -0.284827    1.825250
 C     -4.079796   -0.490880    0.072134
 C     -3.311236   -1.668398    0.134890
 H     -3.357944   -2.385689   -0.681988
 C     -2.452804   -1.929823    1.230142
 H     -1.867585   -2.848062    1.227795
 C     -2.358890   -1.041373    2.325180
 C     -2.990404    0.201124    2.179460
 H     -2.825291    0.984662    2.917746
 C     -3.827658    0.479371    1.057084
 H     -4.267677    1.472466    0.978926
 C      1.536528   -2.595528   -0.695655
 C      1.298353   -3.222451    0.526236
 C      2.758181   -2.716296   -1.348133
 C      2.312749   -3.969214    1.110777
 H      0.334338   -3.118031    1.023165
 C      3.767788   -3.468941   -0.753044
 H      2.920038   -2.222098   -2.303970
 C      3.547259   -4.088693    0.473207
 H      2.140102   -4.460516    2.066659
 H      4.730540   -3.567414   -1.251494
 H     -1.758191    2.483387    0.717471
 C     -1.437997   -1.328841    3.463219
 H     -1.866971   -2.101348    4.115900
 H     -0.473803   -1.710145    3.099680
 H     -1.256126   -0.432373    4.066787
 C     -4.877246   -0.185497   -1.172599
 H     -5.201149   -1.154539   -1.583166
 C     -6.107982    0.667736   -0.904633
 H     -6.712437    0.744493   -1.817632
 H     -6.739552    0.239353   -0.115108
 H     -5.836371    1.691166   -0.609257
 C     -3.962773    0.483183   -2.200557
 H     -3.080507   -0.137219   -2.421790
 H     -4.500315    0.656163   -3.142704
 H     -3.614297    1.458421   -1.826770
 H     -1.445577    2.115663   -0.859134
 Fe    -1.867013   -0.037907    0.329580
 H      4.341150   -4.672041    0.936621
73
5 Gsolv= -2132.625404
 O     -0.760394   -2.576844   -1.222449
 O      0.682799   -1.012935   -2.551264
 S      0.371601   -1.640102   -1.254067
 N      0.136982   -0.507632   -0.098360
 C      0.978946    0.701931   -0.266163
 H      0.799427    1.142492   -1.262768
 C      0.465637    1.698262    0.770141
 H      0.680916    1.300601    1.775202
 N     -1.002605    1.689134    0.619401
 C      1.086925    3.063758    0.632638
 C      1.973102    3.523544    1.607814
 H      2.187689    2.895539    2.473958
 C      2.583537    4.768133    1.480202
 H      3.272109    5.114844    2.249513
 C      2.310807    5.566467    0.373306
 H      2.784687    6.541840    0.272461
 C      1.429719    5.113103   -0.605967
 H      1.214397    5.732638   -1.475484
 C      0.823300    3.867516   -0.481003
 H      0.138775    3.521846   -1.257548
 C      2.462073    0.469099   -0.108190
 C      3.337663    0.885101   -1.110339
 H      2.933059    1.351118   -2.010755
 C      4.711580    0.700540   -0.973045
 H      5.384291    1.027005   -1.764980
 C      5.220160    0.094870    0.171848
 H      6.293370   -0.056525    0.279940
 C      4.351450   -0.317702    1.182234
 H      4.745035   -0.792440    2.080378
 C      2.981169   -0.127960    1.044029
 H      2.303989   -0.460932    1.832836
 C     -3.865629   -0.598054    0.475779
 C     -3.089422   -1.773424    0.404356
 H     -3.173837   -2.420804   -0.466294
 C     -2.185889   -2.125765    1.436203
 H     -1.594543   -3.034112    1.329723
 C     -2.045421   -1.333561    2.598125
 C     -2.668970   -0.079976    2.576135
 H     -2.466888    0.642430    3.365785
 C     -3.558897    0.289277    1.519660
 H     -4.001378    1.283085    1.551539
 C      1.800160   -2.589138   -0.769514
 C      1.738321   -3.306845    0.423882
 C      2.928908   -2.615615   -1.579518
 C      2.841924   -4.051942    0.817992
 H      0.841383   -3.272692    1.043602
 C      4.028785   -3.368283   -1.174745
 H      2.949311   -2.047862   -2.507809
 C      3.986172   -4.079438    0.020735
 H      2.810604   -4.614543    1.749278
 H      4.921851   -3.394316   -1.796752
 H     -1.450383    2.284998    1.319827
 C     -1.067634   -1.714501    3.659136
 H     -1.409173   -2.611150    4.193445
 H     -0.090732   -1.955322    3.215655
 H     -0.930554   -0.908476    4.388642
 C     -4.842704   -0.276627   -0.627440
 H     -4.380516   -0.605450   -1.573189
 C     -6.111394   -1.100685   -0.405674
 H     -6.828615   -0.919170   -1.217040
 H     -5.898052   -2.177577   -0.374366
 H     -6.593213   -0.820365    0.542595
 C     -5.176960    1.201885   -0.747735
 H     -4.278221    1.830534   -0.827490
 H     -5.782553    1.370503   -1.647572
 H     -5.762510    1.552579    0.114551
 H     -2.154135    0.192630   -1.790057
 C     -2.333563    1.092055   -2.446691
 O     -1.814449    2.171783   -2.050385
 O     -3.030065    0.905677   -3.460924
 H     -1.282877    2.019371   -0.331292
 Fe    -1.619434   -0.170609    0.673018
 H      4.850050   -4.662974    0.334824
73
5' Gsolv= -2132.640419
 O      -0.661412   -2.639884   -1.330108
 O       0.834059   -1.106068   -2.639090
 S       0.452393   -1.677007   -1.331376
 N       0.129006   -0.518829   -0.243051
 C       0.983010    0.683747   -0.355430
 H       0.963191    1.066951   -1.391185
 C       0.310938    1.739136    0.523922
 H       0.347657    1.392824    1.569718
 N      -1.109441    1.735944    0.124657
 C       0.969077    3.090872    0.429978
 C       1.714332    3.572167    1.507461
 H       1.785790    2.973356    2.416792
 C       2.366157    4.799171    1.427726
 H       2.943647    5.162020    2.276902
 C       2.276536    5.559866    0.265544
 H       2.783442    6.521600    0.200700
 C       1.535525    5.086628   -0.815100
 H       1.463694    5.676818   -1.727665
 C       0.887927    3.857899   -0.736414
 H       0.317498    3.494833   -1.593076
 C       2.423930    0.482483    0.048214
 C       3.447525    0.915586   -0.793906
 H       3.191867    1.372095   -1.752191
 C       4.782421    0.761664   -0.426055
 H       5.571961    1.101634   -1.095035
 C       5.104058    0.168658    0.791040
 H       6.146693    0.041133    1.079223
 C       4.085957   -0.262653    1.641391
 H       4.332131   -0.729083    2.594800
 C       2.754686   -0.102395    1.273513
 H       1.960597   -0.448844    1.937357
 C      -4.028309   -0.548653    0.606541
 C      -3.295845   -1.742194    0.434075
 H      -3.572059   -2.433135   -0.362334
 C      -2.194682   -2.045715    1.256685
 H      -1.642732   -2.967815    1.082737
 C      -1.803958   -1.194780    2.318697
 C      -2.415632    0.056670    2.372684
 H      -2.055259    0.810063    3.072703
 C      -3.506214    0.382862    1.511570
 H      -3.941652    1.377518    1.592374
 C       1.870001   -2.591252   -0.744330
 C       1.718863   -3.382550    0.393226
 C       3.091031   -2.492688   -1.401588
 C       2.819337   -4.070497    0.889138
 H       0.748135   -3.461779    0.883631
 C       4.187153   -3.188605   -0.897938
 H       3.182777   -1.875763   -2.293509
 C       4.053213   -3.968454    0.247137
 H       2.714379   -4.691066    1.777363
 H       5.149525   -3.115570   -1.401912
 H      -1.651352    2.385895    0.699204
 C      -0.658765   -1.553691    3.204872
 H      -0.976132   -2.288496    3.958306
 H       0.157921   -2.014048    2.632271
 H      -0.269504   -0.675898    3.734674
 C      -5.229159   -0.260773   -0.257731
 H      -5.090391   -0.822149   -1.195061
 C      -6.473202   -0.804626    0.444416
 H      -7.363805   -0.653038   -0.180170
 H      -6.382359   -1.879162    0.654362
 H      -6.635575   -0.283607    1.399811
 C      -5.402061    1.211979   -0.599981
 H      -4.489773    1.640330   -1.040588
 H      -6.216371    1.330479   -1.326639
 H      -5.669834    1.806358    0.285260
 H      -2.225039    0.348549   -3.835331
 C      -2.026164    0.720322   -2.802948
 O      -2.486513   -0.006407   -1.874527
 O      -1.395738    1.791440   -2.692091
 H      -1.212681    2.003458   -0.872230
 Fe     -1.771735   -0.113130    0.209888
 H       4.914204   -4.506524    0.640507
85
6R Gsolv= -2475.970050
 O     -1.286760   -1.784557   -1.793335
 O      0.612893   -0.336397   -2.565538
 S      0.079661   -1.281857   -1.565118
 N      0.155223   -0.673727   -0.067091
 C      1.261171    0.274637    0.166526
 H      1.280166    1.036151   -0.629383
 C      0.877482    0.999040    1.463572
 H      1.030132    0.286551    2.300587
 N     -0.539469    1.324179    1.300940
 C      1.778270    2.187433    1.705620
 C      2.851219    2.086360    2.594201
 H      2.990944    1.163618    3.160450
 C      3.745843    3.141583    2.753044
 H      4.576822    3.045102    3.450891
 C      3.580578    4.315114    2.021819
 H      4.282853    5.138868    2.142601
 C      2.510203    4.428483    1.137166
 H      2.367149    5.339748    0.555931
 C      1.616231    3.374042    0.986245
 H      0.779966    3.478436    0.298650
 C      2.615666   -0.380960    0.244023
 C      3.683283    0.135011   -0.490431
 H      3.515621    1.002226   -1.133631
 C      4.943766   -0.454681   -0.417068
 H      5.768887   -0.045068   -0.998568
 C      5.145548   -1.568614    0.392654
 H      6.128748   -2.034283    0.447676
 C      4.083558   -2.088688    1.132739
 H      4.235177   -2.963350    1.764644
 C      2.827527   -1.497337    1.058441
 H      1.991214   -1.917408    1.622138
 C     -3.587588   -0.989682    1.105114
 C     -2.771467   -2.124159    0.930791
 H     -2.921042   -2.785376    0.080732
 C     -1.735464   -2.427619    1.849649
 H     -1.095780   -3.288985    1.658872
 C     -1.479460   -1.621001    2.973951
 C     -2.200594   -0.411709    3.065342
 H     -1.945429    0.308298    3.841966
 C     -3.241084   -0.099000    2.146824
 H     -3.770891    0.847475    2.249335
 H     -1.901748    0.763527   -1.505670
 C      1.149647   -2.708371   -1.596224
 C      0.757014   -3.842654   -0.887691
 C      2.369096   -2.653607   -2.262130
 C      1.613001   -4.935610   -0.835960
 H     -0.212242   -3.872085   -0.389623
 C      3.219131   -3.755026   -2.203576
 H      2.649017   -1.758943   -2.815266
 C      2.845274   -4.888660   -1.487417
 H      1.317687   -5.828631   -0.287832
 H      4.178198   -3.723174   -2.717954
 H     -0.863743    2.123534   -0.114608
 H     -0.876582    1.789313    2.148277
 C     -2.005334    1.845635   -1.730700
 O     -1.044476    2.573153   -1.013947
 H      2.469256    4.387804   -2.912426
 C      1.705013    3.686703   -2.538167
 O      0.625781    4.332973   -2.140074
 O      1.854101    2.481427   -2.509157
 H     -0.035886    3.671949   -1.771786
 C     -3.415262    2.186525   -1.290370
 C     -0.380481   -1.943163    3.933125
 H      0.057960   -1.032885    4.360803
 H     -0.767621   -2.544829    4.767807
 H      0.414665   -2.525390    3.450520
 C     -4.768872   -0.689635    0.214061
 H     -4.930992    0.399848    0.244656
 C     -4.596658   -1.112026   -1.238172
 H     -5.468821   -0.785477   -1.820146
 H     -3.702456   -0.674276   -1.702056
 H     -4.529493   -2.205139   -1.337353
 C     -6.000324   -1.362946    0.821501
 H     -6.172835   -1.035675    1.855880
 H     -6.896671   -1.124265    0.233347
 H     -5.878302   -2.456468    0.825861
 Fe    -1.408774   -0.378210    1.086782
 O     -4.404321    2.046652   -1.982048
 O     -3.470133    2.598843   -0.019551
 H     -4.408250    2.764148    0.204125
 C     -1.817659    2.056049   -3.216164
 H     -0.806655    1.739471   -3.501664
 H     -2.544925    1.469079   -3.788766
 H     -1.942344    3.116735   -3.474811
 H      3.515185   -5.745706   -1.440432
85
6S Gsolv= -2475.968286
 O      0.849555   -2.184540    1.768827
 O     -0.723867   -0.356349    2.480561
 S     -0.353121   -1.383968    1.486936
 N     -0.206575   -0.744030    0.000369
 C     -1.115587    0.392476   -0.268678
 H     -0.968976    1.170161    0.499011
 C     -0.616244    0.973115   -1.593856
 H     -0.867321    0.242067   -2.390358
 N      0.830084    1.082742   -1.434367
 C     -1.318362    2.270079   -1.924060
 C     -2.361376    2.284479   -2.853153
 H     -2.617770    1.364886   -3.382303
 C     -3.079321    3.451157   -3.102555
 H     -3.889068    3.442323   -3.831317
 C     -2.765850    4.624141   -2.420811
 H     -3.329663    5.536346   -2.611518
 C     -1.722916    4.623306   -1.497326
 H     -1.464257    5.533642   -0.955828
 C     -1.004700    3.456699   -1.256237
 H     -0.185810    3.476783   -0.540498
 C     -2.578762    0.031133   -0.327099
 C     -3.507472    0.760572    0.415956
 H     -3.156414    1.568929    1.060933
 C     -4.866140    0.459407    0.344778
 H     -5.580013    1.035237    0.932731
 C     -5.308997   -0.576870   -0.471753
 H     -6.370191   -0.816924   -0.525399
 C     -4.387808   -1.307107   -1.222433
 H     -4.727755   -2.120783   -1.862609
 C     -3.033037   -1.002596   -1.151616
 H     -2.313946   -1.582560   -1.733419
 C      3.725157   -1.096444   -1.151760
 C      3.060714   -2.140641   -0.484917
 H      3.382068   -2.465638    0.501677
 C      1.965178   -2.809443   -1.091796
 H      1.478036   -3.611654   -0.540332
 C      1.498984   -2.467480   -2.376200
 C      2.031072   -1.299652   -2.950400
 H      1.604159   -0.897554   -3.868555
 C      3.127096   -0.618820   -2.337441
 H      3.514810    0.283120   -2.811313
 H      2.872444    0.828113    0.720540
 C     -1.708681   -2.546884    1.436470
 C     -1.562367   -3.702789    0.671447
 C     -2.883893   -2.283246    2.130752
 C     -2.620740   -4.599020    0.589152
 H     -0.630011   -3.901180    0.143222
 C     -3.938320   -3.188909    2.043144
 H     -2.974770   -1.376824    2.726073
 C     -3.809212   -4.339706    1.271014
 H     -2.517513   -5.504287   -0.006646
 H     -4.864905   -2.989388    2.579008
 H      1.276564    1.946522   -0.108845
 H      1.236668    1.404692   -2.316893
 C      2.588146    1.683766    1.359902
 O      1.624054    2.463641    0.704978
 H     -1.608327    4.899465    2.578494
 C     -1.018143    4.041919    2.214825
 O      0.192477    4.423252    1.855696
 O     -1.445099    2.906317    2.162574
 H      0.713178    3.634834    1.514215
 C      0.333980   -3.174128   -2.988387
 H     -0.222525   -2.515547   -3.667017
 H      0.675454   -4.040323   -3.572658
 H     -0.353615   -3.550896   -2.219590
 C      4.939183   -0.388750   -0.596687
 H      4.724401    0.694375   -0.625935
 C      5.287671   -0.784832    0.828896
 H      6.138111   -0.187066    1.182074
 H      4.454000   -0.633223    1.529083
 H      5.586552   -1.842241    0.882094
 C      6.128289   -0.654373   -1.521361
 H      5.933185   -0.325238   -2.550356
 H      7.017979   -0.122803   -1.158547
 H      6.363014   -1.728722   -1.546293
 Fe     1.483051   -0.659467   -0.987611
 C      2.083046    1.085775    2.655776
 O      1.190667    1.859009    3.267293
 H      0.928289    1.428555    4.105424
 O      2.512350    0.048855    3.125328
 C      3.805502    2.533222    1.687497
 H      3.496508    3.389092    2.304935
 H      4.561641    1.960892    2.239997
 H      4.252165    2.915143    0.761449
 H     -4.637943   -5.042486    1.201611
85
TS2,3-R Gsolv= -2475.934071 
 O      -0.56922500   -2.28814700   -1.89697800
 O       1.06871400   -0.50430000   -2.54422700
 S       0.60692800   -1.47575000   -1.52542900
 N       0.32730700   -0.79548300   -0.10284300
 C       1.17904400    0.36130600    0.21028200
 H       1.12958600    1.10271500   -0.60704300
 C       0.55064500    1.03259600    1.43682400
 H       0.60974400    0.33852500    2.29034000
 N      -0.88772400    1.19793800    1.12895000
 C       1.25425600    2.31840500    1.78927000
 C       2.07869400    2.37746700    2.91386300
 H       2.16141600    1.50373100    3.56228400
 C       2.80037500    3.53208200    3.20425100
 H       3.43992800    3.56279900    4.08540800
 C       2.70695900    4.64166500    2.36861600
 H       3.27385200    5.54425900    2.59256000
 C       1.88504900    4.59214700    1.24500200
 H       1.80867000    5.45230100    0.58037200
 C       1.16267500    3.43852500    0.95754900
 H       0.52642100    3.41897000    0.07130600
 C       2.63434900    0.03295700    0.45207400
 C       3.62764200    0.71249600   -0.25344600
 H       3.33744800    1.46938100   -0.98625800
 C       4.97404500    0.42332300   -0.04131100
 H       5.73871200    0.95842100   -0.60320200
 C       5.33911100   -0.55102200    0.88274100
 H       6.39062200   -0.78234800    1.04802300
 C       4.35262400   -1.23075300    1.59720500
 H       4.63265900   -1.99485500    2.32173900
 C       3.00985900   -0.93954000    1.38338300
 H       2.24097800   -1.48055100    1.93853400
 C      -3.94142000   -1.17475700    1.02416900
 C      -3.14789800   -2.12987500    0.33108100
 H      -3.45764300   -2.49629100   -0.64499800
 C      -1.99964400   -2.69695600    0.92578800
 H      -1.45545300   -3.47372000    0.39101500
 C      -1.54006300   -2.25355800    2.18296000
 C      -2.18460400   -1.13556400    2.73340300
 H      -1.77442700   -0.66839600    3.62887700
 C      -3.40209100   -0.63868900    2.19098100
 H      -3.89435300    0.20072600    2.68253700
 H      -2.36334000    0.16827900   -0.67755200
 C       1.94765900   -2.64683900   -1.33590500
 C       1.72856500   -3.78627300   -0.56257200
 C       3.19127500   -2.39286000   -1.90426000
 C       2.77547400   -4.67413900   -0.34743200
 H       0.74456800   -3.97798700   -0.13377400
 C       4.23471900   -3.28883400   -1.68357900
 H       3.34275300   -1.50133000   -2.50973500
 C       4.02936400   -4.42326100   -0.90383100
 H       2.61227000   -5.56723000    0.25356500
 H       5.21225300   -3.09550100   -2.12283800
 H      -0.99971100    1.85605600    0.34905700
 H      -1.37899800    1.59898100    1.93193100
 C      -2.05207800    1.71851000   -2.00460300
 O      -1.05791900    2.33580900   -1.61212000
 C      -5.24293800   -0.63479000    0.47773600
 H      -5.15725600    0.46618400    0.47216900
 C      -5.56344600   -1.09975500   -0.93363600
 H      -6.47015200   -0.59507200   -1.29233100
 H      -4.75667900   -0.87430500   -1.64350400
 H      -5.75430500   -2.18285600   -0.96122400
 C      -6.38144800   -1.01397300    1.42582700
 H      -6.21592800   -0.63590000    2.44308900
 H      -7.33282200   -0.60250700    1.06257500
 H      -6.48683800   -2.10743400    1.48313900
 Fe     -1.65323500   -0.56725200    0.62467000
 C      -3.40796400    2.05043200   -1.39647800
 H       2.84376000    3.87152000   -2.85234900
 C       1.79455100    3.72718600   -2.54528400
 O       1.40880700    2.48335800   -2.77255100
 O       1.10110300    4.60241700   -2.07056900
 H       0.46724700    2.36627200   -2.45894700
 O      -4.46171000    1.72402600   -1.90201600
 O      -3.29649800    2.79959300   -0.29985200
 H      -4.19596000    2.99886000    0.02825500
 C      -2.05264200    0.86036600   -3.22001600
 H      -1.06109600    0.41284500   -3.35495700
 H      -2.81998700    0.08110600   -3.18539800
 H      -2.26569100    1.50542700   -4.08694000
 H       4.84843400   -5.11960000   -0.73106600
 C      -0.31791800   -2.83892200    2.81021100
 H      -0.57324400   -3.76886100    3.33835600
 H       0.44059500   -3.09217500    2.05752300
 H       0.12528600   -2.15377800    3.54348800
85
TS2,3-S Gsolv= -2475.929023
 O      -0.670551   -2.150232   -1.933493
 O       1.130203   -0.504133   -2.526396
 S       0.557256   -1.434030   -1.529003
 N       0.291336   -0.733800   -0.110643
 C       1.192109    0.384634    0.206948
 H       1.133327    1.157300   -0.580514
 C       0.640831    1.025812    1.483757
 H       0.714153    0.297053    2.306663
 N      -0.804441    1.248885    1.250726
 C       1.396198    2.276055    1.855278
 C       2.248686    2.276527    2.960078
 H       2.322208    1.380861    3.579022
 C       3.008568    3.401785    3.268218
 H       3.668970    3.387953    4.134288
 C       2.926475    4.539231    2.469789
 H       3.522962    5.418801    2.707985
 C       2.077813    4.547359    1.364886
 H       2.009444    5.429682    0.728984
 C       1.316929    3.423469    1.060695
 H       0.657063    3.449153    0.192415
 C       2.646712    0.009965    0.374706
 C       3.624529    0.681331   -0.359482
 H       3.319211    1.463710   -1.059179
 C       4.970635    0.350799   -0.218335
 H       5.723487    0.880810   -0.800616
 C       5.350003   -0.659711    0.660559
 H       6.401007   -0.924685    0.768902
 C       4.378835   -1.332720    1.401872
 H       4.670269   -2.125749    2.090049
 C       3.036868   -0.996104    1.263057
 H       2.279284   -1.529910    1.840080
 C      -3.975878   -0.976075    1.220424
 C      -3.266175   -1.901412    0.404223
 H      -3.655561   -2.184506   -0.571505
 C      -2.114306   -2.562502    0.884644
 H      -1.650653   -3.330883    0.268614
 C      -1.561489   -2.233708    2.141067
 C      -2.110177   -1.125724    2.800130
 H      -1.624288   -0.743568    3.698196
 C      -3.337422   -0.544095    2.377146
 H      -3.767408    0.268424    2.963537
 H      -2.418328    0.405248   -0.513893
 C       1.796141   -2.710370   -1.309404
 C       1.470848   -3.843728   -0.565852
 C       3.076763   -2.536972   -1.824059
 C       2.448985   -4.798413   -0.313429
 H       0.458306   -3.983144   -0.188025
 C       4.050156   -3.499970   -1.569641
 H       3.312174   -1.652115   -2.411697
 C       3.740332   -4.623562   -0.809138
 H       2.201250   -5.685034    0.268015
 H       5.055943   -3.366253   -1.965378
 H      -0.929411    1.964877    0.524284
 H      -1.242334    1.610984    2.102046
 C      -2.415233    2.212711   -1.485964
 O      -1.309436    2.719583   -1.276107
 C      -2.589712    1.239081   -2.644488
 C      -5.311952   -0.388465    0.834357
 H      -5.247541    0.699804    1.005810
 C      -5.709601   -0.632752   -0.612176
 H      -6.645510   -0.102293   -0.832500
 H      -4.951013   -0.283685   -1.326249
 H      -5.889555   -1.701623   -0.800305
 C      -6.382603   -0.948212    1.773314
 H      -6.160005   -0.731524    2.826431
 H      -7.363320   -0.513847    1.536427
 H      -6.460586   -2.039784    1.660249
 C      -0.343208   -2.926282    2.655936
 H      -0.597596   -3.943012    2.987367
 H       0.423789   -3.023829    1.876351
 H       0.091548   -2.393579    3.510377
 Fe     -1.657347   -0.447306    0.681156
 O      -1.420820    0.906097   -3.171281
 H      -1.565197    0.259626   -3.890785
 O      -3.670674    0.866199   -3.053175
 C      -3.651657    2.703442   -0.816092
 H      -3.954264    3.635165   -1.319312
 H      -4.482041    1.995069   -0.884015
 H      -3.436782    2.945938    0.231644
 H       2.597495    3.767433   -2.942176
 C       1.587371    3.728546   -2.501760
 O       1.042274    2.539755   -2.691929
 O       1.062325    4.661017   -1.929461
 H       0.135961    2.515328   -2.274194
 H       4.505390   -5.371445   -0.606852
85
TS3,6-R Gsolv= -2475.968000
 O      -0.744953   -2.287140   -1.728808
 O       0.705147   -0.403653   -2.533957
 S       0.430798   -1.429015   -1.508748
 N       0.309759   -0.772050   -0.026927
 C       1.198564    0.390446    0.198655
 H       1.068236    1.122609   -0.613665
 C       0.661653    1.045057    1.476340
 H       0.878618    0.366591    2.323869
 N      -0.787502    1.116110    1.264410
 C       1.339514    2.368498    1.741097
 C       2.436370    2.425141    2.605072
 H       2.743201    1.525072    3.140696
 C       3.144602    3.610589    2.779599
 H       3.996976    3.635900    3.457457
 C       2.767008    4.759308    2.088563
 H       3.324229    5.685857    2.220180
 C       1.667897    4.716440    1.234696
 H       1.356985    5.608341    0.690537
 C       0.958129    3.531458    1.067135
 H       0.089956    3.521693    0.412264
 C       2.662896    0.046759    0.298852
 C       3.590591    0.753330   -0.466912
 H       3.235830    1.529236   -1.149161
 C       4.951009    0.468127   -0.373097
 H       5.664825    1.025345   -0.978657
 C       5.394960   -0.530998    0.487946
 H       6.457500   -0.760145    0.559167
 C       4.474001   -1.239364    1.259877
 H       4.816351   -2.023248    1.934884
 C       3.117413   -0.948862    1.167879
 H       2.398170   -1.509548    1.768147
 C      -3.597837   -1.379933    0.901910
 C      -2.739386   -2.431817    0.543471
 H      -2.884594   -2.970696   -0.388838
 C      -1.673522   -2.825308    1.390593
 H      -1.025120   -3.639369    1.069736
 C      -1.445082   -2.205416    2.635065
 C      -2.178074   -1.035622    2.898469
 H      -1.933504   -0.424549    3.766687
 C      -3.232135   -0.617211    2.030705
 H      -3.777833    0.296349    2.267486
 H      -2.211909    0.471570   -1.265697
 C       1.847610   -2.514017   -1.477023
 C       1.804608   -3.632273   -0.646400
 C       2.971849   -2.220258   -2.240303
 C       2.915074   -4.463123   -0.573108
 H       0.914645   -3.846351   -0.055366
 C       4.080006   -3.060243   -2.159389
 H       2.982298   -1.340864   -2.881386
 C       4.052994   -4.174403   -1.325775
 H       2.894100   -5.338372    0.073879
 H       4.968351   -2.837601   -2.748105
 H      -1.071043    1.749066    0.184528
 H      -1.249442    1.530174    2.078171
 C      -2.284845    1.552497   -1.549009
 O      -1.317349    2.278714   -0.872975
 H       1.646883    4.572335   -2.997784
 C       1.048313    3.757203   -2.555484
 O      -0.087100    4.206821   -2.071979
 O       1.418216    2.597395   -2.538643
 H      -0.604347    3.433160   -1.637365
 C      -3.689529    1.939090   -1.119620
 C      -0.316003   -2.639505    3.511198
 H       0.025973   -1.825076    4.160951
 H      -0.631722   -3.471551    4.156128
 H       0.533185   -2.996287    2.912931
 C      -4.814021   -1.014525    0.090149
 H      -4.956321    0.073388    0.181053
 C      -4.713853   -1.381819   -1.383492
 H      -5.566719   -0.959431   -1.930386
 H      -3.792186   -1.004405   -1.850231
 H      -4.742023   -2.471706   -1.526464
 C      -6.026088   -1.695371    0.729062
 H      -6.152414   -1.397724    1.778813
 H      -6.942663   -1.430165    0.185316
 H      -5.915263   -2.789418    0.695226
 Fe     -1.382381   -0.698954    0.946320
 O      -4.681225    1.870040   -1.819787
 O      -3.742809    2.319152    0.164698
 H      -4.676031    2.518515    0.379690
 C      -2.131180    1.661871   -3.054427
 H      -1.113920    1.363289   -3.337079
 H      -2.846056    1.018430   -3.581633
 H      -2.293947    2.698202   -3.382805
 H       4.923616   -4.825125   -1.262084
85
TS3,6-S Gsolv= -2475.968708
 O       0.849357   -2.184437    1.778678
 O      -0.703641   -0.337044    2.485424
 S      -0.347519   -1.375390    1.498636
 N      -0.197049   -0.742605    0.007664
 C      -1.109755    0.389428   -0.270016
 H      -0.986325    1.160658    0.507274
 C      -0.593965    0.988449   -1.581770
 H      -0.815852    0.264477   -2.390619
 N       0.852865    1.094952   -1.397504
 C      -1.295128    2.285739   -1.909676
 C      -2.366450    2.288752   -2.806581
 H      -2.641147    1.362416   -3.314179
 C      -3.088820    3.453427   -3.050391
 H      -3.920712    3.436448   -3.753545
 C      -2.750857    4.635436   -2.396160
 H      -3.318170    5.546347   -2.582515
 C      -1.678290    4.645878   -1.507902
 H      -1.399282    5.564377   -0.991131
 C      -0.955052    3.481091   -1.271000
 H      -0.108608    3.511600   -0.588308
 C      -2.567366    0.014887   -0.360097
 C      -3.514536    0.737781    0.365189
 H      -3.179831    1.547075    1.018089
 C      -4.869684    0.429785    0.264581
 H      -5.599257    1.000303    0.838163
 C      -5.288684   -0.607457   -0.563401
 H      -6.347200   -0.852866   -0.640377
 C      -4.348175   -1.331633   -1.296067
 H      -4.670570   -2.145623   -1.944723
 C      -2.996755   -1.020480   -1.195813
 H      -2.262255   -1.594344   -1.765156
 C       3.727265   -1.118473   -1.159534
 C       3.056996   -2.153160   -0.481816
 H       3.379497   -2.472703    0.506332
 C       1.947849   -2.810259   -1.074955
 H       1.454244   -3.601892   -0.514138
 C       1.475415   -2.470798   -2.360088
 C       2.020366   -1.317497   -2.947026
 H       1.590627   -0.913292   -3.862841
 C       3.125556   -0.644193   -2.343474
 H       3.517711    0.252504   -2.823655
 H       2.850271    0.835827    0.707724
 C      -1.715705   -2.522830    1.457791
 C      -1.581190   -3.688810    0.706213
 C      -2.888544   -2.237272    2.147819
 C      -2.649852   -4.573611    0.632727
 H      -0.650668   -3.903877    0.181408
 C      -3.952970   -3.131993    2.069233
 H      -2.969422   -1.323225    2.732791
 C      -3.836031   -4.292545    1.309827
 H      -2.556573   -5.486660    0.047315
 H      -4.877851   -2.916099    2.601627
 H       1.184987    1.814760   -0.265779
 H       1.284310    1.454992   -2.252284
 C       2.507362    1.690887    1.323457
 O       1.468968    2.358575    0.682247
 H      -1.476364    4.914430    2.667845
 C      -0.943078    4.044160    2.248694
 O       0.262790    4.378767    1.841418
 O      -1.429537    2.931336    2.186923
 H       0.728792    3.567561    1.445114
 C       0.288152   -3.160783   -2.947240
 H      -0.205236   -2.536160   -3.701960
 H       0.590336   -4.099249   -3.432856
 H      -0.443995   -3.418535   -2.169735
 C       4.950358   -0.416063   -0.618995
 H       4.753497    0.668731   -0.683620
 C       5.285512   -0.771973    0.820098
 H       6.143426   -0.176068    1.158007
 H       4.450938   -0.584061    1.510212
 H       5.568111   -1.831412    0.909488
 C       6.137415   -0.732360   -1.530395
 H       5.950610   -0.433999   -2.570300
 H       7.034998   -0.204543   -1.181908
 H       6.353481   -1.810843   -1.519185
 Fe      1.492175   -0.671431   -0.968161
 C       2.088370    1.091251    2.651138
 O       1.225109    1.860854    3.311246
 H       1.019264    1.431116    4.165242
 O       2.544472    0.058131    3.105733
 C       3.678197    2.627359    1.594741
 H       3.336637    3.470549    2.213243
 H       4.496622    2.117072    2.120601
 H       4.059082    3.025487    0.646001
 H      -4.672765   -4.986450    1.247206
73
TS5,1 Gsolv= -2132.595831
O       0.779521   -2.644646    1.055750
O      -0.627488   -1.177666    2.521112
S      -0.350425   -1.700930    1.164819
N      -0.122200   -0.537319    0.067322
C      -0.950652    0.662559    0.278522
H      -0.881797    0.987162    1.333773
C      -0.349827    1.802798   -0.559088
H      -0.405504    1.515490   -1.622226
N       1.077314    1.889404   -0.221860
C      -1.118026    3.087780   -0.359609
C      -1.934576    3.582444   -1.377535
H      -1.986992    3.046596   -2.326847
C      -2.683720    4.740856   -1.189779
H      -3.315787    5.113392   -1.994944
C      -2.623531    5.419862    0.023608
H      -3.207660    6.326767    0.173611
C      -1.811402    4.933993    1.046196
H      -1.760903    5.459275    1.999102
C      -1.065253    3.775283    0.856766
H      -0.441735    3.401406    1.671847
C      -2.412702    0.460133   -0.050269
C      -3.393894    0.840569    0.864975
H      -3.091770    1.266574    1.823805
C      -4.745023    0.671900    0.570248
H      -5.499859    0.971829    1.296155
C      -5.127115    0.112449   -0.645375
H      -6.182303   -0.028407   -0.876076
C      -4.152388   -0.270829   -1.566328
H      -4.445028   -0.712386   -2.518521
C      -2.805153   -0.091709   -1.272541
H      -2.045530   -0.401787   -1.992141
C       3.990263   -0.266738   -0.649373
C       3.452728   -1.594113   -0.686727
H       3.783052   -2.313592    0.062760
C       2.470027   -1.951383   -1.617957
H       2.021854   -2.943455   -1.570360
C       1.909032   -0.984202   -2.483415
C       2.475392    0.312566   -2.481296
H       2.043102    1.077601   -3.126012
C       3.538886    0.646481   -1.623374
H       3.899766    1.673896   -1.607218
C      -1.796490   -2.622164    0.667215
C      -1.724794   -3.366051   -0.509588
C      -2.966121   -2.560406    1.415722
C      -2.852312   -4.048985   -0.947305
H      -0.794488   -3.409463   -1.076492
C      -4.091385   -3.248139    0.967380
H      -2.996380   -1.978715    2.335141
C      -4.035890   -3.984432   -0.212391
H      -2.809141   -4.633720   -1.864510
H      -5.014516   -3.203997    1.543005
H       1.543708    2.567524   -0.825913
C       0.759364   -1.325032   -3.371976
H       1.110319   -1.838901   -4.278363
H       0.055563   -1.999697   -2.866357
H       0.218918   -0.424543   -3.689147
C       5.057480    0.065807    0.362737
H       4.870889   -0.579791    1.237341
C       6.423090   -0.293948   -0.219956
H       7.217705   -0.112928    0.516218
H       6.470460   -1.349966   -0.519385
H       6.636366    0.321085   -1.107222
C       5.031788    1.514848    0.825485
H       4.040459    1.812179    1.198286
H       5.755264    1.658877    1.638697
H       5.312847    2.205041    0.017054
H       2.134490   -0.093769    1.163464
C       2.098741    0.215379    2.684895
O       1.575855    1.283767    2.769943
O       2.636362   -0.746585    3.136396
H       1.199559    2.206336    0.743451
Fe      1.849698   -0.171657   -0.391962
H      -4.919291   -4.516971   -0.561131
70
1-singlet Gsolv= -1944.102697
O   -0.773343   -2.789471   -1.201224
O    0.613657   -1.263948   -2.617613
S    0.278735   -1.759676   -1.262350
N   -0.058822   -0.569708   -0.214337
C    0.767828    0.631740   -0.456534
H    0.728239    0.915223   -1.526111
C    0.102465    1.772883    0.310860
H    0.093300    1.517304    1.382330
N   -1.306281    1.773599   -0.129296
C    0.802877    3.095650    0.127499
C    1.470398    3.682620    1.203555
H    1.458041    3.184386    2.174297
C    2.151032    4.886924    1.047160
H    2.665982    5.332308    1.897313
C    2.170855    5.519153   -0.192470
H    2.700972    6.462215   -0.317878
C    1.510532    4.939507   -1.273641
H    1.525432    5.426950   -2.247552
C    0.833611    3.734515   -1.115880
H    0.331991    3.287711   -1.976124
C    2.222982    0.497711   -0.068626
C    3.220197    0.870982   -0.969681
H    2.935644    1.225123   -1.962557
C    4.565587    0.783843   -0.619268
H    5.332804    1.076304   -1.335173
C    4.926532    0.315216    0.640349
H    5.977548    0.238205    0.915910
C    3.936062   -0.057595    1.548718
H    4.212540   -0.425725    2.536303
C    2.593885    0.040666    1.198601
H    1.822312   -0.255811    1.911103
C   -4.089162   -0.359993    0.123785
C   -3.421671   -1.618837    0.193868
H   -3.627371   -2.376576   -0.562011
C   -2.422680   -1.844556    1.147575
H   -1.849639   -2.769340    1.103614
C   -2.064951   -0.860190    2.113268
C   -2.717249    0.371899    2.040566
H   -2.396071    1.189110    2.688329
C   -3.715408    0.620685    1.056244
H   -4.124843    1.627071    0.974800
H   -2.172501   -0.080802   -1.463301
C    1.749898   -2.579789   -0.656531
C    1.665215   -3.279867    0.545925
C    2.940523   -2.515100   -1.370333
C    2.799403   -3.905498    1.048111
H    0.719517   -3.332904    1.085713
C    4.072544   -3.146611   -0.859935
H    2.981934   -1.970698   -2.311841
C    4.003688   -3.833795    0.348240
H    2.744596   -4.452824    1.987651
H    5.011497   -3.096219   -1.409070
H   -1.363519    2.065768   -1.107072
H   -1.836907    2.463441    0.407689
C   -0.963737   -1.121795    3.086047
H   -1.315173   -1.762921    3.907236
H   -0.128155   -1.645677    2.601510
H   -0.585580   -0.190831    3.527257
C   -5.143980   -0.133518   -0.930783
H   -4.856717   -0.746816   -1.801000
C   -6.482089   -0.649206   -0.404093
H   -7.265015   -0.550143   -1.168150
H   -6.423006   -1.707274   -0.113422
H   -6.796038   -0.072115    0.478911
C   -5.267231    1.312353   -1.384996
H   -4.300912    1.724009   -1.711027
H   -5.964927    1.380335   -2.230068
H   -5.662853    1.957040   -0.586899
Fe   -2.015351   -0.083802    0.068878
H    4.891725   -4.322054    0.746567
85
2R-singlet Gsolv= -2475.926296
O   -1.045197   -2.530004   -1.536415
O    0.009006   -0.443178   -2.416281
S    0.025483   -1.525810   -1.405012
N    0.064518   -0.993326    0.124763
C    1.063859    0.073012    0.341703
H    1.066099    0.792211   -0.500549
C    0.588612    0.866220    1.566976
H    0.595153    0.193005    2.438202
N   -0.821942    1.200486    1.299887
C    1.485226    2.042889    1.854668
C    2.372651    1.988166    2.930399
H    2.351108    1.123745    3.596762
C    3.300075    3.005280    3.137760
H    3.990299    2.945807    3.978286
C    3.349694    4.091880    2.268481
H    4.080440    4.884300    2.424391
C    2.460161    4.160696    1.198150
H    2.490682    5.004096    0.508280
C    1.531084    3.145115    0.997324
H    0.849109    3.205506    0.149721
C    2.484935   -0.407297    0.562799
C    3.561882    0.335990    0.072842
H    3.370070    1.230098   -0.522327
C    4.872881   -0.056038    0.326121
H    5.699593    0.534680   -0.067114
C    5.126064   -1.207360    1.067297
H    6.151000   -1.522578    1.258997
C    4.059002   -1.954927    1.560471
H    4.247069   -2.858674    2.139612
C    2.749375   -1.551013    1.317117
H    1.915987   -2.146192    1.691961
C   -3.817332   -0.978563    0.948650
C   -3.069359   -2.158042    0.709424
H   -3.255405   -2.751783   -0.180774
C   -1.995166   -2.498927    1.547452
H   -1.354070   -3.335238    1.264820
C   -1.664300   -1.747330    2.702431
C   -2.398571   -0.569317    2.913081
H   -2.085710    0.110259    3.708781
C   -3.458826   -0.180167    2.056654
H   -3.961075    0.774595    2.216198
H   -2.127424    0.115045   -0.458188
C    1.550962   -2.419211   -1.667748
C    1.659858   -3.707126   -1.146143
C    2.616158   -1.812352   -2.324007
C    2.860218   -4.393923   -1.280104
H    0.812387   -4.164211   -0.635276
C    3.817119   -2.506087   -2.446797
H    2.514122   -0.802182   -2.719732
C    3.939736   -3.790527   -1.924212
H    2.955920   -5.401269   -0.878324
H    4.661002   -2.037929   -2.951281
H   -0.885333    1.840000    0.501725
H   -1.226255    1.695446    2.098246
C   -1.847683    2.412026   -2.018191
O   -0.929562    2.863844   -1.354583
C   -3.245070    2.327048   -1.390329
O   -3.268446    2.822665   -0.160944
O   -4.202080    1.903101   -1.997641
C   -1.745733    1.979854   -3.428644
H   -2.129164    0.956093   -3.535349
H   -2.386567    2.621097   -4.050705
H   -0.706930    2.035824   -3.768566
H    3.313030    3.407566   -2.649636
C    2.286386    3.023091   -2.537802
O    1.445482    4.002881   -2.250893
O    1.976973    1.856950   -2.667062
H    0.545339    3.609152   -2.107580
H   -4.184070    2.769340    0.181357
C   -0.543278   -2.157238    3.600306
H    0.238091   -2.691033    3.043492
H   -0.088844   -1.293818    4.103864
H   -0.903921   -2.840175    4.383270
C   -4.981026   -0.579000    0.075652
H   -4.999659    0.522758    0.041229
C   -4.903193   -1.108453   -1.348800
H   -5.695489   -0.654100   -1.958516
H   -3.938441   -0.881638   -1.825260
H   -5.052040   -2.197683   -1.380260
C   -6.269374   -1.054815    0.747610
H   -6.384685   -0.630423    1.754300
H   -7.145351   -0.763347    0.152407
H   -6.274226   -2.151583    0.839158
Fe   -1.758508   -0.517220    0.898857
H    4.882024   -4.327588   -2.021261
85
2S-singlet Gsolv= -2475.924832
O   -1.390357   -2.046977   -1.809749
O   -0.229510    0.111894   -2.288859
S   -0.244733   -1.161969   -1.531097
N   -0.096455   -0.978139    0.071390
C    1.016586   -0.078899    0.442580
H    1.093038    0.773022   -0.260135
C    0.651256    0.527523    1.805236
H    0.622468   -0.285304    2.547616
N   -0.731831    1.022044    1.672541
C    1.656011    1.559877    2.248715
C    2.572630    1.248431    3.254204
H    2.505204    0.281854    3.757189
C    3.583347    2.142718    3.595416
H    4.294486    1.882845    4.378429
C    3.687680    3.363036    2.933303
H    4.482285    4.060654    3.194220
C    2.770306    3.687859    1.936142
H    2.843174    4.640083    1.410932
C    1.759197    2.793508    1.599978
H    1.057473    3.057876    0.808649
C    2.375656   -0.745485    0.532527
C    3.526779   -0.047027    0.158677
H    3.433418    0.954664   -0.264526
C    4.786970   -0.618030    0.310486
H    5.673242   -0.059342    0.011363
C    4.913659   -1.902568    0.833195
H    5.898300   -2.354361    0.946995
C    3.771280   -2.609324    1.202054
H    3.859406   -3.617899    1.605088
C    2.513491   -2.030725    1.058602
H    1.619400   -2.592165    1.332386
C   -3.918862   -0.804005    1.028538
C   -3.273100   -1.983092    0.582431
H   -3.510238   -2.403933   -0.390587
C   -2.223788   -2.543178    1.332379
H   -1.654951   -3.369050    0.901885
C   -1.824924   -2.025241    2.588600
C   -2.460110   -0.843027    3.005652
H   -2.087250   -0.332656    3.896511
C   -3.492216   -0.234591    2.249727
H   -3.915248    0.716638    2.574598
H   -2.178295    0.396916   -0.172104
C    1.200847   -2.066345   -2.068235
C    1.251288   -3.435198   -1.810763
C    2.262632   -1.406153   -2.677361
C    2.388230   -4.151185   -2.163928
H    0.408445   -3.933210   -1.331539
C    3.398746   -2.132576   -3.025859
H    2.212394   -0.333351   -2.861552
C    3.462662   -3.498812   -2.767572
H    2.437818   -5.220820   -1.967044
H    4.239011   -1.625237   -3.497272
H   -0.765392    1.797427    1.003162
H   -1.054985    1.397436    2.567136
C   -1.888522    2.831970   -1.272940
O   -0.855421    3.060467   -0.664595
C   -1.809230    2.389313   -2.738215
H    3.416557    3.646180   -1.989171
C    2.394791    3.244270   -1.896199
O    1.554193    4.185830   -1.498950
O    2.088555    2.095096   -2.132412
H    0.655497    3.779952   -1.398528
C   -3.245890    2.998372   -0.707002
H   -3.933766    2.224716   -1.063113
H   -3.207041    3.029062    0.387141
H   -3.635329    3.962206   -1.074247
O   -2.691510    1.758343   -3.274908
O   -0.685476    2.793251   -3.303906
H   -0.655229    2.464043   -4.225434
C   -0.735962   -2.664255    3.386803
H   -1.146219   -3.427999    4.063546
H   -0.007749   -3.167810    2.737633
H   -0.204483   -1.930356    4.007078
C   -5.050195   -0.166874    0.259881
H   -5.016713    0.913836    0.476462
C   -4.979750   -0.363591   -1.247432
H   -5.764476    0.229882   -1.736337
H   -4.011195   -0.054359   -1.666283
H   -5.150227   -1.413795   -1.525779
C   -6.367803   -0.717399    0.806012
H   -6.469768   -0.532365    1.884145
H   -7.222175   -0.250285    0.297709
H   -6.429748   -1.803684    0.640460
Fe   -1.836092   -0.505199    1.017508
H    4.355050   -4.060984   -3.038619
85
3R-singlet Gsolv= -2475.943887
O   -0.878741   -2.364893   -1.607115
O    0.521118   -0.473625   -2.479940
S    0.291928   -1.492225   -1.441186
N    0.181123   -0.764037    0.018054
C    1.119476    0.371391    0.214904
H    0.954513    1.116263   -0.579502
C    0.707047    0.996978    1.546210
H    0.956410    0.295397    2.357183
N   -0.770730    1.065469    1.497936
C    1.402867    2.308930    1.805278
C    2.365356    2.389206    2.812858
H    2.567304    1.512825    3.430884
C    3.073029    3.569480    3.025254
H    3.820617    3.616911    3.815924
C    2.827348    4.683535    2.227682
H    3.382346    5.606241    2.391232
C    1.869400    4.611491    1.218463
H    1.669218    5.474248    0.582873
C    1.162349    3.432753    1.009400
H    0.419080    3.394395    0.215051
C    2.585204    0.009487    0.222315
C    3.465709    0.690776   -0.618635
H    3.073507    1.450756   -1.298534
C    4.827156    0.395509   -0.602759
H    5.505101    0.932045   -1.265393
C    5.317823   -0.587018    0.251989
H    6.381025   -0.823570    0.260809
C    4.443392   -1.268972    1.097806
H    4.822184   -2.039456    1.768603
C    3.086476   -0.966469    1.087614
H    2.404745   -1.502975    1.750369
C   -3.519528   -1.345367    1.026397
C   -2.699233   -2.451045    0.686594
H   -2.867612   -2.983456   -0.244538
C   -1.600673   -2.796768    1.471309
H   -0.929152   -3.584483    1.133747
C   -1.263039   -2.052659    2.633035
C   -2.106666   -0.980007    2.988328
H   -1.808044   -0.332697    3.813445
C   -3.213732   -0.620470    2.191936
H   -3.777971    0.282505    2.425766
H   -2.065926    0.581906   -1.452472
C    1.716637   -2.566048   -1.449204
C    1.725006   -3.678590   -0.609813
C    2.783127   -2.286551   -2.296560
C    2.833349   -4.515736   -0.611582
H    0.878761   -3.888887    0.043302
C    3.887262   -3.134709   -2.291914
H    2.750309   -1.414570   -2.946659
C    3.913920   -4.242041   -1.449282
H    2.853074   -5.386631    0.041102
H    4.729736   -2.924549   -2.948543
H   -1.058457    1.690918    0.724411
H   -1.148349    1.448661    2.367702
C   -2.202326    1.648317   -1.737960
O   -1.291898    2.393204   -0.979148
H    1.940947    4.625889   -2.709171
C    1.131830    3.891025   -2.465833
O    0.040896    4.400969   -2.081789
O    1.398093    2.680263   -2.606007
H   -0.897843    3.150228   -1.504023
C   -3.632348    1.961097   -1.340643
C   -0.020983   -2.358748    3.400007
H    0.394612   -1.459210    3.870778
H   -0.244413   -3.080033    4.198970
H    0.740878   -2.808933    2.750830
C   -4.707016   -0.960808    0.183635
H   -4.834827    0.128476    0.274702
C   -4.582232   -1.335078   -1.287065
H   -5.410856   -0.889498   -1.851747
H   -3.641312   -0.986468   -1.737492
H   -4.639710   -2.423879   -1.428557
C   -5.939107   -1.628479    0.799992
H   -6.090257   -1.320305    1.843145
H   -6.837701   -1.360056    0.229013
H   -5.836390   -2.723489    0.777046
Fe   -1.431721   -0.731213    1.042149
O   -4.597616    1.804241   -2.060857
O   -3.734334    2.368371   -0.069670
H   -4.682198    2.515072    0.124115
C   -1.994165    1.788974   -3.229706
H   -0.957795    1.532430   -3.478507
H   -2.667684    1.123981   -3.782469
H   -2.184394    2.822766   -3.550169
H    4.781231   -4.900226   -1.446146
85
3S-singlet Gsolv= -2475.946197
O   -0.946627   -2.192960   -1.679923
O    0.606598   -0.349425   -2.400120
S    0.261792   -1.397286   -1.423698
N    0.125020   -0.725940    0.061917
C    1.072341    0.389811    0.311835
H    0.919267    1.161128   -0.457809
C    0.665798    0.978161    1.662819
H    0.936761    0.264383    2.456721
N   -0.810528    1.037171    1.644468
C    1.346499    2.297506    1.926888
C    2.388123    2.364303    2.853483
H    2.660786    1.470382    3.416980
C    3.084203    3.553476    3.053313
H    3.894852    3.590083    3.779808
C    2.746859    4.690451    2.324243
H    3.292918    5.620247    2.477383
C    1.707751    4.632615    1.398113
H    1.435251    5.513132    0.816058
C    1.012398    3.444747    1.200825
H    0.206351    3.421275    0.467633
C    2.534898    0.013398    0.315471
C    3.435189    0.748460   -0.456853
H    3.061893    1.564612   -1.079873
C    4.793445    0.438909   -0.442696
H    5.486971    1.018342   -1.050862
C    5.261268   -0.612337    0.340274
H    6.321876   -0.860441    0.346380
C    4.366967   -1.347971    1.117652
H    4.727572   -2.172422    1.732080
C    3.013406   -1.030465    1.111268
H    2.315340   -1.610157    1.717927
C   -3.639154   -1.065471    1.228697
C   -3.004048   -2.162235    0.583368
H   -3.322822   -2.463609   -0.411458
C   -1.901569   -2.799365    1.153159
H   -1.397418   -3.587030    0.597817
C   -1.341943   -2.339692    2.376033
C   -1.970207   -1.252314    3.014676
H   -1.494571   -0.808296    3.889341
C   -3.108453   -0.633101    2.453473
H   -3.502643    0.272752    2.914247
H   -2.728392    0.741322   -0.827261
C    1.623104   -2.552528   -1.411936
C    1.497852   -3.728258   -0.674211
C    2.787877   -2.256853   -2.111809
C    2.571363   -4.608609   -0.617812
H    0.573141   -3.958798   -0.146581
C    3.856979   -3.146302   -2.048270
H    2.860089   -1.338420   -2.690512
C    3.751797   -4.314164   -1.298538
H    2.485032   -5.529039   -0.043190
H    4.776040   -2.921066   -2.586796
H   -1.123599    1.692510    0.907770
H   -1.172864    1.364961    2.542919
C   -2.468235    1.603730   -1.467174
O   -1.419093    2.264771   -0.820583
C   -2.076072    1.026606   -2.811860
H    1.539130    4.901197   -2.558701
C    0.878825    4.062816   -2.217933
O   -0.292073    4.406531   -1.886318
O    1.368803    2.916396   -2.211634
H   -1.085275    3.061503   -1.332183
C   -3.670089    2.511860   -1.676553
H   -4.489799    1.991956   -2.189451
H   -4.030988    2.880108   -0.708241
H   -3.369111    3.375574   -2.287875
O   -2.535898   -0.005198   -3.262505
O   -1.241339    1.817999   -3.480361
H   -1.052000    1.409957   -4.348873
C   -0.086888   -2.933963    2.918843
H   -0.334368   -3.795329    3.555763
H    0.566459   -3.294538    2.114704
H    0.463895   -2.212703    3.534864
C   -4.823065   -0.336441    0.635510
H   -4.577759    0.739964    0.649613
C   -5.162463   -0.753810   -0.786860
H   -5.989663   -0.137167   -1.161408
H   -4.320487   -0.645407   -1.485136
H   -5.496731   -1.801340   -0.819354
C   -6.035288   -0.557821    1.543014
H   -5.859173   -0.203510    2.566723
H   -6.906233   -0.021568    1.144263
H   -6.289468   -1.626809    1.590716
Fe   -1.497800   -0.719294    1.076047
H    4.592652   -5.003952   -1.248042
69
4-singlet Gsolv= -1943.384036
O   -0.809762   -2.617508   -1.474281
O    0.714548   -1.014862   -2.662330
S    0.270006   -1.629940   -1.404010
N   -0.208449   -0.417672   -0.370874
C    0.612892    0.820809   -0.473060
H    0.503123    1.231433   -1.490878
C   -0.002569    1.808232    0.514160
H    0.234757    1.474510    1.535605
N   -1.464692    1.652869    0.381618
C    0.503362    3.214962    0.328379
C    1.303413    3.794145    1.314068
H    1.536151    3.225873    2.215885
C    1.807128    5.081322    1.150340
H    2.430079    5.521901    1.927354
C    1.512994    5.801784   -0.003352
H    1.903900    6.809951   -0.132655
C    0.718368    5.228977   -0.994210
H    0.489017    5.786907   -1.900890
C    0.220405    3.940568   -0.832380
H   -0.390962    3.497468   -1.620708
C    2.082726    0.649362   -0.172465
C    3.035945    1.090469   -1.088616
H    2.706409    1.522314   -2.035257
C    4.394980    0.977247   -0.804162
H    5.130824    1.325855   -1.527374
C    4.808869    0.415856    0.400018
H    5.870837    0.319990    0.622031
C    3.860330   -0.023691    1.323234
H    4.179723   -0.465299    2.266526
C    2.505043    0.100926    1.042180
H    1.765778   -0.250688    1.765279
C   -3.872060   -0.654393    0.024616
C   -3.165996   -1.890184    0.045396
H   -3.174923   -2.521470   -0.839855
C   -2.350319   -2.245457    1.119627
H   -1.737747   -3.142464    1.053691
C   -2.184182   -1.367471    2.224286
C   -2.956494   -0.188625    2.251964
H   -2.784426    0.538545    3.044825
C   -3.797705    0.153025    1.174435
H   -4.254952    1.140527    1.172977
C    1.668888   -2.464970   -0.687364
C    1.479858   -3.191684    0.486569
C    2.910086   -2.388504   -1.309125
C    2.569919   -3.830486    1.063482
H    0.494654   -3.258359    0.946659
C    3.993206   -3.036528   -0.722608
H    3.028924   -1.824085   -2.231737
C    3.825072   -3.748158    0.461965
H    2.438523   -4.398313    1.982669
H    4.972734   -2.980741   -1.194230
H   -1.952387    2.215266    1.083662
C   -1.154679   -1.636838    3.268656
H   -1.591636   -2.233406    4.082138
H   -0.310223   -2.203387    2.856369
H   -0.777964   -0.702332    3.702774
C   -4.585161   -0.234304   -1.240938
H   -5.306205   -1.040382   -1.460185
C   -5.348147    1.071839   -1.101524
H   -5.895921    1.280754   -2.029055
H   -6.077045    1.045775   -0.280890
H   -4.663610    1.916558   -0.928112
C   -3.608698   -0.150122   -2.414963
H   -3.071022   -1.091225   -2.589043
H   -4.152483    0.098477   -3.335928
H   -2.861475    0.640325   -2.240148
H   -1.783943    1.984730   -0.536084
Fe   -1.851812   -0.281317    0.484059
H    4.677364   -4.247818    0.919234
73
5-singlet Gsolv= -2132.591160
O   -0.650813   -2.618200   -1.320811
O    0.735399   -0.949528   -2.582739
S    0.431886   -1.626241   -1.309976
N    0.101207   -0.508736   -0.158406
C    0.892216    0.740607   -0.285422
H    0.723708    1.176967   -1.285284
C    0.300663    1.705501    0.739821
H    0.545323    1.340532    1.749985
N   -1.160800    1.583184    0.587276
C    0.825753    3.109308    0.582102
C    1.708727    3.626831    1.530819
H    1.983729    3.017282    2.393119
C    2.241967    4.903815    1.380341
H    2.930004    5.295211    2.128374
C    1.893794    5.677238    0.276953
H    2.307441    6.677611    0.157529
C    1.014191    5.166986   -0.675422
H    0.740237    5.766861   -1.542268
C    0.485295    3.888900   -0.527720
H   -0.196404    3.496503   -1.284384
C    2.378506    0.583663   -0.074921
C    3.268828    1.109116   -1.010448
H    2.875700    1.603033   -1.901111
C    4.644302    0.998502   -0.819841
H    5.329195    1.411185   -1.559392
C    5.139349    0.354279    0.310020
H    6.214161    0.258545    0.458351
C    4.254701   -0.169155    1.252983
H    4.637903   -0.674982    2.138642
C    2.882599   -0.047328    1.065656
H    2.192465   -0.464268    1.801900
C   -3.735380   -0.748131    0.646362
C   -2.989121   -1.951066    0.472544
H   -3.172521   -2.556623   -0.414476
C   -1.949205   -2.294161    1.334820
H   -1.336885   -3.167158    1.119369
C   -1.565878   -1.418348    2.388204
C   -2.321703   -0.243837    2.576944
H   -1.980141    0.489535    3.307522
C   -3.408739    0.075583    1.731561
H   -3.886576    1.047582    1.841092
C    1.903807   -2.510726   -0.828668
C    1.831907   -3.367696    0.268023
C    3.091262   -2.320910   -1.526294
C    2.982406   -4.023223    0.688486
H    0.886215   -3.524355    0.786601
C    4.237970   -2.982078   -1.095159
H    3.120346   -1.656845   -2.387736
C    4.185282   -3.824040    0.012108
H    2.940028   -4.694103    1.544646
H    5.176051   -2.834477   -1.627740
H   -1.651322    2.166316    1.269348
C   -0.353634   -1.688695    3.212740
H   -0.616985   -2.349359    4.051147
H    0.425868   -2.192173    2.627798
H    0.056269   -0.763010    3.634462
C   -4.805533   -0.402894   -0.357048
H   -4.439542   -0.736061   -1.342203
C   -6.057390   -1.211319   -0.013822
H   -6.847130   -1.018827   -0.751837
H   -5.857308   -2.291272   -0.003768
H   -6.440456   -0.925708    0.977034
C   -5.127751    1.080463   -0.441792
H   -4.230023    1.696438   -0.594815
H   -5.803507    1.260889   -1.287916
H   -5.636130    1.436125    0.466045
H   -2.211602   -0.012438   -1.830114
C   -2.491613    0.885369   -2.456065
O   -1.972666    1.980571   -2.109762
O   -3.285018    0.673565   -3.391146
H   -1.453981    1.877939   -0.371015
Fe   -1.640921   -0.316533    0.631881
H    5.086088   -4.334914    0.348194
73
5'-singlet Gsolv= -2132.620516
O   -0.619347   -2.772804   -1.157941
O    0.728002   -1.176748   -2.548751
S    0.424767   -1.734671   -1.211943
N    0.096228   -0.590827   -0.106515
C    0.891051    0.641149   -0.305721
H    0.800956    0.991091   -1.350422
C    0.236330    1.709884    0.569393
H    0.317027    1.397821    1.622620
N   -1.194645    1.683202    0.219055
C    0.874661    3.066618    0.409086
C    1.647550    3.598649    1.442474
H    1.758369    3.035471    2.370568
C    2.278402    4.830947    1.296034
H    2.877715    5.232689    2.112012
C    2.140456    5.546881    0.110555
H    2.630913    6.512279   -0.006130
C    1.371700    5.023394   -0.926556
H    1.261024    5.577883   -1.857520
C    0.744975    3.789946   -0.780558
H    0.152760    3.388192   -1.604482
C    2.363295    0.516672    0.014618
C    3.311835    0.961821   -0.906070
H    2.976527    1.360021   -1.865860
C    4.672597    0.893423   -0.615656
H    5.401200    1.242930   -1.346127
C    5.097720    0.373729    0.603339
H    6.160964    0.313415    0.832162
C    4.156116   -0.070116    1.531364
H    4.482949   -0.477708    2.487504
C    2.798482    0.006093    1.240430
H    2.066272   -0.346061    1.968487
C   -3.946616   -0.548219    0.573255
C   -3.247204   -1.790763    0.513197
H   -3.512397   -2.507811   -0.264044
C   -2.149282   -2.040960    1.329704
H   -1.577519   -2.957110    1.195529
C   -1.691682   -1.069937    2.267967
C   -2.373593    0.147277    2.321158
H   -1.987024    0.946004    2.954872
C   -3.496693    0.407076    1.487839
H   -3.941375    1.400701    1.505095
C    1.917667   -2.564221   -0.677225
C    1.859508   -3.349219    0.473118
C    3.097779   -2.428141   -1.398723
C    3.011320   -3.985360    0.919051
H    0.919742   -3.463703    1.013662
C    4.247150   -3.071048   -0.945059
H    3.117131   -1.820959   -2.301702
C    4.205729   -3.840522    0.214039
H    2.977569   -4.599059    1.817633
H    5.178141   -2.965121   -1.499826
H   -1.715908    2.328502    0.816027
C   -0.490895   -1.339632    3.108620
H   -0.751676   -2.035522    3.918625
H    0.306464   -1.808212    2.517867
H   -0.102480   -0.421882    3.566335
C   -5.086501   -0.295165   -0.378636
H   -4.853406   -0.844523   -1.304450
C   -6.360117   -0.889475    0.221481
H   -7.202637   -0.771091   -0.472821
H   -6.246117   -1.960524    0.438392
H   -6.618995   -0.377846    1.160523
C   -5.284081    1.171790   -0.727856
H   -4.358115    1.638223   -1.095028
H   -6.043705    1.266371   -1.514710
H   -5.640143    1.750757    0.136439
H   -2.335020    0.162885   -3.603743
C   -2.049353    0.572009   -2.609730
O   -2.246712   -0.246799   -1.658190
O   -1.602605    1.729982   -2.555820
H   -1.329847    1.973097   -0.763412
Fe   -1.844185   -0.185855    0.291043
H    5.107577   -4.337389    0.568162
85
6R-singlet Gsolv= -2475.932154
O   -1.245315   -1.918771   -1.679638
O    0.665698   -0.516665   -2.499916
S    0.109999   -1.391766   -1.448270
N    0.158749   -0.662862   -0.005225
C    1.268695    0.305272    0.136840
H    1.224481    1.040998   -0.681790
C    0.977164    1.057908    1.436408
H    1.255307    0.393411    2.278874
N   -0.464800    1.282228    1.439573
C    1.830786    2.300396    1.543918
C    3.008886    2.273351    2.294503
H    3.267363    1.369803    2.850043
C    3.856906    3.376991    2.331427
H    4.770847    3.337130    2.922931
C    3.539085    4.527253    1.613774
H    4.203738    5.389828    1.638411
C    2.363796    4.567881    0.867288
H    2.101282    5.460892    0.299663
C    1.517318    3.464194    0.837939
H    0.598500    3.513505    0.257707
C    2.643897   -0.314714    0.150946
C    3.651687    0.204411   -0.661680
H    3.421042    1.041428   -1.324914
C    4.934064   -0.340544   -0.637070
H    5.711624    0.073652   -1.277876
C    5.217601   -1.416833    0.198871
H    6.217352   -1.849122    0.214755
C    4.215934   -1.940837    1.016123
H    4.431285   -2.785312    1.670388
C    2.940370   -1.388376    0.995972
H    2.153838   -1.808413    1.626926
C   -3.461662   -1.050453    1.046220
C   -2.575335   -2.135372    1.044427
H   -2.621753   -2.879995    0.253626
C   -1.524703   -2.196357    1.985465
H   -0.755997   -2.962730    1.882477
C   -1.373772   -1.229532    3.005534
C   -2.302527   -0.158397    3.027744
H   -2.153033    0.659182    3.732675
C   -3.284031   -0.043997    2.038028
H   -3.905379    0.850481    1.999620
H   -2.054565    0.646476   -1.217579
C    1.179312   -2.822960   -1.381201
C    0.791777   -3.905498   -0.593311
C    2.393972   -2.821789   -2.058028
C    1.648561   -4.991897   -0.464947
H   -0.175242   -3.903330   -0.090801
C    3.244999   -3.915575   -1.923898
H    2.676049   -1.969907   -2.673380
C    2.877501   -4.993628   -1.123817
H    1.355156   -5.842220    0.148361
H    4.201115   -3.920621   -2.444952
H   -0.986087    2.091782   -0.044975
H   -0.724337    1.809678    2.277672
C   -2.173184    1.689400   -1.583490
O   -1.259639    2.521477   -0.913527
H    2.113511    4.327937   -3.131291
C    1.394690    3.621398   -2.684632
O    0.333056    4.256801   -2.225542
O    1.572381    2.420754   -2.636916
H   -0.284660    3.597905   -1.790307
C   -0.235620   -1.285460    3.969103
H    0.062906   -0.280313    4.292979
H   -0.528840   -1.849263    4.866335
H    0.634893   -1.790341    3.531314
C   -4.636094   -0.935634    0.105282
H   -4.904734    0.130960    0.049442
C   -4.411052   -1.449579   -1.307330
H   -5.320956   -1.285525   -1.900202
H   -3.583355   -0.936667   -1.812961
H   -4.201509   -2.529021   -1.319936
C   -5.807254   -1.671670    0.761589
H   -6.017074   -1.287027    1.769096
H   -6.715912   -1.555831    0.155866
H   -5.588400   -2.746591    0.845508
Fe   -1.383102   -0.306704    1.168367
C   -3.608226    2.043104   -1.251017
H    3.548670   -5.844222   -1.016464
O   -4.555364    1.773945   -1.963499
O   -3.739306    2.624813   -0.055605
H   -4.692215    2.781155    0.102827
C   -1.931336    1.727764   -3.076274
H   -0.892547    1.447865   -3.283984
H   -2.595856    1.030626   -3.599431
H   -2.108806    2.738594   -3.469402
85
6S-singlet Gsolv= -2475.931766
O   -0.815263   -2.275651   -1.701521
O    0.687174   -0.394531   -2.425529
S    0.354619   -1.426697   -1.421813
N    0.192063   -0.772254    0.051970
C    1.078553    0.391767    0.288514
H    0.902991    1.150093   -0.492219
C    0.585195    0.990067    1.606348
H    0.908073    0.314396    2.425285
N   -0.869371    0.980034    1.495861
C    1.209036    2.342942    1.865128
C    2.339007    2.439823    2.682166
H    2.720551    1.543431    3.174463
C    2.986104    3.658283    2.866544
H    3.865275    3.711562    3.507634
C    2.511586    4.804738    2.234096
H    3.018509    5.758486    2.374672
C    1.381294    4.722529    1.425073
H    0.995848    5.610437    0.923383
C    0.735250    3.502796    1.247022
H   -0.154396    3.463701    0.621877
C    2.554361    0.076619    0.329940
C    3.450173    0.837111   -0.422789
H    3.065867    1.635593   -1.060741
C    4.818857    0.580713   -0.369872
H    5.505739    1.182553   -0.963964
C    5.305882   -0.445440    0.434176
H    6.374689   -0.652554    0.471719
C    4.417805   -1.208565    1.192003
H    4.791583   -2.014724    1.822953
C    3.053681   -0.943727    1.144694
H    2.362264   -1.545879    1.736312
C   -3.621146   -1.162905    1.168037
C   -2.939906   -2.245824    0.557383
H   -3.242763   -2.597327   -0.425621
C   -1.814320   -2.812500    1.162261
H   -1.259567   -3.583053    0.630810
C   -1.294474   -2.303375    2.378163
C   -1.969488   -1.217933    2.979663
H   -1.526978   -0.738918    3.853310
C   -3.121240   -0.660052    2.384836
H   -3.565424    0.238536    2.813579
H   -2.875966    0.660601   -0.779389
C    1.756010   -2.539021   -1.381596
C    1.664788   -3.701467   -0.618110
C    2.920425   -2.220580   -2.071492
C    2.766355   -4.543765   -0.528547
H    0.742591   -3.948753   -0.093071
C    4.020124   -3.069364   -1.973594
H    2.968920   -1.312178   -2.668528
C    3.945732   -4.223801   -1.199881
H    2.704426   -5.453170    0.066698
H    4.938739   -2.823343   -2.504056
H   -1.341091    1.822217    0.066606
H   -1.280295    1.390814    2.339014
C   -2.622039    1.532371   -1.408112
O   -1.691258    2.335692   -0.730843
H    1.459785    4.911067   -2.551999
C    0.893599    4.032601   -2.200464
O   -0.337693    4.370228   -1.867929
O    1.359530    2.912905   -2.139061
H   -0.829646    3.563701   -1.532825
C   -0.026474   -2.836617    2.957457
H    0.511458   -2.064614    3.522742
H   -0.248758   -3.659915    3.651503
H    0.635258   -3.232215    2.176311
C   -4.851733   -0.525214    0.563159
H   -4.690761    0.566764    0.570592
C   -5.161274   -0.978740   -0.855151
H   -6.022297   -0.417399   -1.240742
H   -4.324421   -0.830945   -1.551872
H   -5.432313   -2.044690   -0.875281
C   -6.045693   -0.829783    1.471166
H   -5.900241   -0.450281    2.490680
H   -6.955791   -0.369053    1.064890
H   -6.215211   -1.914945    1.531857
Fe   -1.497968   -0.715172    1.060736
C   -2.081526    0.973007   -2.706285
O   -1.220477    1.793197   -3.301083
H   -0.933173    1.385423   -4.142310
O   -2.464391   -0.074658   -3.190855
C   -3.862674    2.346360   -1.734356
H   -3.575132    3.223468   -2.332069
H   -4.591139    1.759132   -2.307746
H   -4.334112    2.695826   -0.807757
H    4.809350   -4.882457   -1.122535
66
5'a Gsolv= -1941.103462
 O     -1.305500   -2.705461   -1.394497
 O      0.691076   -1.832257   -2.633355
 S      0.084202   -2.218975   -1.341686
 N      0.177721   -1.013686   -0.257790
 C      1.382359   -0.164405   -0.381359
 H      1.478449    0.208101   -1.416519
 C      1.122504    1.045890    0.514161
 H      1.066114    0.703202    1.559791
 N     -0.228349    1.521872    0.155537
 C      2.194184    2.099162    0.402127
 C      3.044071    2.337272    1.483143
 H      2.903176    1.773924    2.407010
 C      4.065434    3.278362    1.389120
 H      4.720744    3.453772    2.241212
 C      4.245812    3.992883    0.208555
 H      5.043180    4.730824    0.132029
 C      3.401946    3.761517   -0.875665
 H      3.539285    4.317354   -1.802211
 C      2.383632    2.818390   -0.782229
 H      1.731060    2.643665   -1.639505
 C      2.667422   -0.863546   -0.011390
 C      3.702313   -0.955252   -0.941542
 H      3.570493   -0.510432   -1.929572
 C      4.884539   -1.620432   -0.623524
 H      5.682617   -1.690992   -1.361449
 C      5.041676   -2.196325    0.633459
 H      5.963241   -2.720192    0.883655
 C      4.015272   -2.100358    1.572628
 H      4.134935   -2.547987    2.558503
 C      2.835662   -1.438643    1.251819
 H      2.027926   -1.383281    1.983959
 C     -3.738401    0.282770    0.634287
 C     -3.413689   -1.077939    0.450417
 H     -3.894749   -1.642424   -0.348210
 C     -2.456469   -1.714961    1.263145
 H     -2.211919   -2.759297    1.074931
 C     -1.820557   -1.037370    2.330901
 C     -2.011408    0.341678    2.395243
 H     -1.432362    0.939755    3.098581
 C     -2.947879    0.999256    1.540943
 H     -3.049902    2.079509    1.629837
 H     -0.511316    2.298561    0.757583
 C     -0.839097   -1.744962    3.203434
 H     -1.364260   -2.358850    3.948774
 H     -0.207120   -2.425322    2.616203
 H     -0.195941   -1.038859    3.742178
 C     -4.798808    0.931861   -0.218006
 H     -4.822002    0.383022   -1.172624
 C     -6.151469    0.748047    0.470156
 H     -6.956421    1.168119   -0.147801
 H     -6.375277   -0.312887    0.647011
 H     -6.163656    1.265081    1.441298
 C     -4.539370    2.401843   -0.513114
 H     -3.542090    2.564168   -0.947739
 H     -5.284273    2.773191   -1.228879
 H     -4.625597    3.019067    0.392720
 H     -1.843184    0.744135   -3.793881
 C     -1.503236    0.986379   -2.759458
 O     -2.129016    0.389332   -1.836859
 O     -0.570511    1.808282   -2.643603
 H     -0.259616    1.838078   -0.831985
 Fe    -1.462536   -0.010509    0.236402
 C      1.032521   -3.599605   -0.728547
 H      2.098178   -3.350844   -0.703479
 H      0.672039   -3.854561    0.274515
 H      0.859170   -4.436305   -1.415374
76
5'b Gsolv= -2171.901889
 O     -0.408978   -2.584432   -1.423034
 O      0.760899   -0.766130   -2.699703
 S      0.527618   -1.448575   -1.410369
 N      0.052656   -0.401840   -0.261525
 C      0.689801    0.930474   -0.352451
 H      0.561413    1.341012   -1.370191
 C     -0.102049    1.827963    0.599136
 H      0.048237    1.460486    1.627502
 N     -1.523386    1.602922    0.271695
 C      0.317920    3.273128    0.523953
 C      1.025746    3.845912    1.581626
 H      1.240843    3.245521    2.467082
 C      1.460738    5.166368    1.511592
 H      2.011699    5.600069    2.344990
 C      1.189027    5.929270    0.379693
 H      1.525980    6.963355    0.322998
 C      0.484395    5.364801   -0.681324
 H      0.270591    5.956052   -1.570735
 C      0.054039    4.043720   -0.612713
 H     -0.489408    3.611323   -1.454756
 C      2.162515    0.959811   -0.015514
 C      3.058577    1.593137   -0.876435
 H      2.683696    2.042313   -1.798267
 C      4.417859    1.645009   -0.575509
 H      5.106277    2.139940   -1.259372
 C      4.893912    1.054268    0.591305
 H      5.957467    1.082220    0.825374
 C      4.002923    0.425879    1.461346
 H      4.370661   -0.037860    2.376530
 C      2.645077    0.387087    1.164263
 H      1.952379   -0.111835    1.844578
 C     -4.025762   -1.165554    0.594615
 C     -3.098061   -2.206782    0.383020
 H     -3.249334   -2.902940   -0.441712
 C     -1.962102   -2.349224    1.202802
 H     -1.257609   -3.153125    0.995757
 C     -1.723960   -1.485034    2.297537
 C     -2.544921   -0.362202    2.396956
 H     -2.319020    0.415617    3.126044
 C     -3.675742   -0.195367    1.540792
 H     -4.275738    0.705822    1.655738
 C      2.093336   -2.121458   -0.892025
 C      2.118127   -2.960666    0.219488
 C      3.268332   -1.764711   -1.544525
 C      3.338922   -3.421480    0.694917
 H      1.189497   -3.248697    0.713671
 C      4.482101   -2.230047   -1.053937
 H      3.233494   -1.118404   -2.419615
 C      4.537647   -3.051285    0.076269
 H      3.366578   -4.076404    1.566067
 H      5.409217   -1.944196   -1.552672
 C      5.859149   -3.488321    0.625930
 H      6.538508   -3.817929   -0.171056
 H      6.356811   -2.654373    1.143583
 H      5.749381   -4.306929    1.347369
 H     -2.128779    2.111008    0.920892
 C     -0.523711   -1.670235    3.164786
 H     -0.706745   -2.460021    3.907035
 H      0.346939   -1.982878    2.571938
 H     -0.271427   -0.751443    3.708003
 C     -5.256179   -1.055637   -0.268426
 H     -5.012359   -1.524561   -1.234776
 C     -6.378409   -1.863292    0.383635
 H     -7.279877   -1.843915   -0.243461
 H     -6.088664   -2.912497    0.532446
 H     -6.638241   -1.439522    1.365237
 C     -5.701428    0.376597   -0.525567
 H     -4.885396    0.996598   -0.925640
 H     -6.521079    0.384509   -1.255791
 H     -6.079828    0.854190    0.389641
 H     -2.453937    0.319469   -3.755377
 C     -2.365938    0.652145   -2.694590
 O     -2.603984   -0.239862   -1.830366
 O     -2.061526    1.846293   -2.493375
 H     -1.739658    1.916116   -0.693625
 Fe    -1.869689   -0.332348    0.256047
75
5'c Gsolv= -2337.048605
 O      0.156600   -2.489111    1.429301
 O     -0.576166   -0.469137    2.729607
 S     -0.497507   -1.172603    1.435919
 N      0.154141   -0.256501    0.277781
 C     -0.190982    1.180762    0.363684
 H      0.014188    1.560117    1.380682
 C      0.782004    1.885825   -0.581583
 H      0.579367    1.543519   -1.609473
 N      2.119626    1.377344   -0.219755
 C      0.664712    3.386726   -0.530940
 C      0.104410    4.072730   -1.609598
 H     -0.215350    3.513104   -2.490133
 C     -0.052009    5.455061   -1.566760
 H     -0.490535    5.977004   -2.416149
 C      0.353630    6.166174   -0.441202
 H      0.234522    7.248133   -0.405686
 C      0.912351    5.488944    0.640507
 H      1.229323    6.040375    1.524645
 C      1.064312    4.106707    0.599090
 H      1.496066    3.587518    1.456446
 C     -1.624711    1.501960    0.018159
 C     -2.388615    2.282951    0.884756
 H     -1.941354    2.639640    1.814583
 C     -3.710693    2.596803    0.578152
 H     -4.297667    3.204032    1.265956
 C     -4.280850    2.126642   -0.601220
 H     -5.316639    2.363474   -0.840743
 C     -3.521129    1.350517   -1.476754
 H     -3.963004    0.980362   -2.401298
 C     -2.199806    1.044527   -1.170836
 H     -1.609883    0.431242   -1.854818
 C      3.990404   -1.863446   -0.620453
 C      2.856129   -2.678682   -0.419638
 H      2.854072   -3.405972    0.392289
 C      1.713786   -2.553731   -1.232853
 H      0.851429   -3.188435   -1.034199
 C      1.667104   -1.638997   -2.312593
 C      2.712065   -0.719482   -2.392713
 H      2.659699    0.103145   -3.105769
 C      3.855422   -0.820127   -1.543036
 H      4.636777   -0.069036   -1.645932
 C     -2.190980   -1.504551    0.945083
 C     -2.401090   -2.314803   -0.170422
 C     -3.248275   -0.955614    1.661909
 C     -3.695703   -2.565495   -0.592850
 H     -1.557621   -2.747141   -0.707580
 C     -4.549928   -1.201606    1.245217
 H     -3.056917   -0.337429    2.536047
 C     -4.745390   -1.997579    0.123621
 H     -3.895602   -3.189508   -1.459022
 H     -5.398559   -0.784047    1.779548
 H      2.835581    1.764805   -0.838865
 C      0.456781   -1.546322   -3.179837
 H      0.439340   -2.376439   -3.900045
 H     -0.463349   -1.620135   -2.583580
 H      0.437308   -0.607726   -3.746366
 C      5.217615   -2.047506    0.234746
 H      4.874462   -2.444569    1.203223
 C      6.112168   -3.098816   -0.422159
 H      6.996021   -3.293202    0.200090
 H      5.581218   -4.049567   -0.567113
 H      6.459274   -2.749135   -1.405939
 C      5.991891   -0.762213    0.486082
 H      5.352376    0.031110    0.900215
 H      6.801450   -0.951200    1.202934
 H      6.457205   -0.382896   -0.435089
 H      2.847242   -0.188124    3.766167
 C      2.729551    0.187666    2.723149
 O      2.778921   -0.704388    1.826344
 O      2.573414    1.415860    2.570785
 H      2.357304    1.622439    0.759734
 Fe     2.065841   -0.586904   -0.238812
 N     -6.111826   -2.254120   -0.320345
 O     -6.276509   -2.973032   -1.295664
 O     -7.028525   -1.737879    0.302579
73
5'd Gsolv= -2231.860694
 O     -0.397145   -2.571828   -1.405849
 O      0.826180   -0.785756   -2.677604
 S      0.550588   -1.445606   -1.385451
 N      0.063784   -0.384166   -0.260019
 C      0.713069    0.942185   -0.352480
 H      0.604838    1.345500   -1.375233
 C     -0.091258    1.856462    0.573279
 H      0.031599    1.500477    1.609073
 N     -1.506172    1.639321    0.212328
 C      0.343841    3.296799    0.490402
 C      1.038881    3.873511    1.554481
 H      1.231742    3.280651    2.450059
 C      1.489173    5.188473    1.478229
 H      2.029995    5.625205    2.316671
 C      1.245524    5.942107    0.333798
 H      1.594570    6.971899    0.272239
 C      0.553630    5.373786   -0.733465
 H      0.361749    5.957710   -1.632659
 C      0.108130    4.058044   -0.658705
 H     -0.424728    3.622387   -1.505751
 C      2.178526    0.958369    0.011662
 C      3.101070    1.553558   -0.848055
 H      2.752308    1.979230   -1.791035
 C      4.453596    1.599570   -0.516781
 H      5.163580    2.065075   -1.199235
 C      4.894868    1.045804    0.681137
 H      5.952250    1.074901    0.940911
 C      3.977966    0.451165    1.548134
 H      4.318455    0.015083    2.486746
 C      2.628200    0.412131    1.216971
 H      1.914203   -0.057716    1.896089
 C     -4.036415   -1.120591    0.591145
 C     -3.105544   -2.162487    0.395528
 H     -3.257055   -2.873754   -0.416298
 C     -1.971120   -2.291616    1.218969
 H     -1.268332   -3.101077    1.028475
 C     -1.734728   -1.408964    2.299149
 C     -2.552725   -0.282383    2.374064
 H     -2.327577    0.508196    3.089532
 C     -3.684455   -0.131467    1.516157
 H     -4.284642    0.771269    1.616158
 C      2.097757   -2.142077   -0.834528
 C      2.086688   -2.961621    0.293752
 C      3.281447   -1.852856   -1.504667
 C      3.278557   -3.487075    0.770519
 H      1.149276   -3.191046    0.800429
 C      4.479864   -2.379421   -1.035145
 H      3.269588   -1.216542   -2.387185
 C      4.452179   -3.178871    0.096004
 H      3.311398   -4.130060    1.647075
 H      5.426228   -2.173859   -1.530529
 H     -2.125412    2.174379    0.825806
 C     -0.542553   -1.584198    3.179205
 H     -0.730654   -2.370702    3.923676
 H      0.335632   -1.896916    2.597871
 H     -0.299752   -0.661554    3.720172
 C     -5.274418   -1.040990   -0.264168
 H     -5.021408   -1.490782   -1.237337
 C     -6.363983   -1.894740    0.385372
 H     -7.270070   -1.897350   -0.235313
 H     -6.038490   -2.935490    0.518489
 H     -6.630634   -1.492334    1.374063
 C     -5.772109    0.376735   -0.500712
 H     -4.983267    1.029835   -0.901149
 H     -6.598565    0.363857   -1.223052
 H     -6.157714    0.830430    0.423671
 H     -2.509866    0.270235   -3.784345
 C     -2.310413    0.616519   -2.743235
 O     -2.619508   -0.210813   -1.836874
 O     -1.823628    1.756741   -2.602856
 H     -1.677878    1.923691   -0.769848
 Fe    -1.871212   -0.292327    0.232609
 F      5.603420   -3.682070    0.554928
61
5'e Gsolv= -1975.604940
 O      0.785089   -2.810955    1.212592
 O     -0.549550   -1.137592    2.522420
 S     -0.198919   -1.715518    1.209781
 N      0.309043   -0.579179    0.170263
 C     -0.370426    0.726679    0.307071
 H     -0.293818    1.083359    1.349580
 C      0.433680    1.695456   -0.560250
 H      0.323238    1.397503   -1.615141
 N      1.847732    1.467989   -0.199556
 C     -0.013403    3.125406   -0.398772
 C     -0.702124    3.757921   -1.434804
 H     -0.880726    3.217176   -2.365569
 C     -1.164028    5.062603   -1.286154
 H     -1.699932    5.543794   -2.103121
 C     -0.938725    5.749248   -0.096655
 H     -1.297213    6.770833    0.021577
 C     -0.253158    5.124701    0.942985
 H     -0.075559    5.656405    1.876823
 C      0.204076    3.819229    0.795893
 H      0.733329    3.338476    1.620531
 C     -1.827945    0.720328   -0.085896
 C     -2.788326    1.211510    0.797337
 H     -2.471921    1.587114    1.772470
 C     -4.137608    1.211430    0.450407
 H     -4.878182    1.593094    1.152067
 C     -4.536241    0.715950   -0.787278
 H     -5.591008    0.706819   -1.058906
 C     -3.580562    0.231542   -1.680602
 H     -3.888293   -0.156549   -2.651091
 C     -2.234500    0.238095   -1.333071
 H     -1.489401   -0.154202   -2.028395
 C      4.379005   -1.268938   -0.748719
 C      3.482444   -2.335542   -0.575760
 H      3.652611   -3.077471    0.200798
 C      2.346988   -2.439112   -1.402505
 H      1.657383   -3.266730   -1.258997
 C      2.113265   -1.492380   -2.418336
 C      2.913745   -0.355459   -2.481948
 H      2.676627    0.451780   -3.171821
 C      4.049658   -0.236445   -1.627707
 H      4.666210    0.658031   -1.681871
 C     -1.698649   -2.421056    0.545050
 C     -1.628858   -3.089376   -0.676149
 C     -2.897222   -2.300787    1.238529
 C     -2.786171   -3.638225   -1.212963
 H     -0.680989   -3.164731   -1.209792
 C     -4.052382   -2.853693    0.690435
 H     -2.925719   -1.776170    2.191663
 C     -3.996932   -3.518283   -0.530876
 H     -2.745223   -4.161107   -2.166876
 H     -4.998000   -2.762294    1.222242
 H      2.468495    2.044355   -0.772742
 H      2.982833   -0.076551    3.694476
 C      2.702344    0.306022    2.685450
 O      3.052949   -0.433573    1.718392
 O      2.097880    1.395153    2.631347
 H      2.003663    1.695546    0.799482
 Fe     2.233629   -0.454483   -0.316989
 H     -4.902630   -3.947384   -0.956444
 H      1.225993   -1.573931   -3.044219
 H      5.240548   -1.169197   -0.092742
71
5'f Gsolv= -2206.408614
 O      0.066349   -2.414437   -2.238228
 O      0.135168   -0.129033   -3.274250
 S      0.418507   -0.990506   -2.108828
 N     -0.276687   -0.420955   -0.759926
 C     -0.277806    1.051835   -0.640155
 H     -0.706241    1.509642   -1.549649
 C     -1.229472    1.353939    0.518736
 H     -0.785931    0.939075    1.436512
 N     -2.451535    0.571103    0.247440
 C     -1.473304    2.825640    0.719254
 C     -0.916117    3.469699    1.825380
 H     -0.334487    2.887895    2.544116
 C     -1.090669    4.837991    2.010431
 H     -0.650773    5.328220    2.877809
 C     -1.828289    5.575495    1.088560
 H     -1.968862    6.645889    1.232176
 C     -2.386502    4.940347   -0.018706
 H     -2.962325    5.513795   -0.743853
 C     -2.207837    3.573434   -0.205640
 H     -2.642245    3.087574   -1.081282
 C      1.077649    1.670101   -0.394394
 C      1.492359    2.760969   -1.156623
 H      0.841448    3.137302   -1.948278
 C      2.726355    3.363242   -0.919754
 H      3.040344    4.212438   -1.525412
 C      3.556544    2.876896    0.085714
 H      4.523189    3.343695    0.270736
 C      3.146690    1.787642    0.855123
 H      3.792758    1.397969    1.642376
 C      1.915085    1.189284    0.615736
 H      1.604257    0.325365    1.204990
 C     -3.267383   -3.186098    0.399487
 C     -1.994992   -3.561717   -0.055936
 H     -1.883526   -4.169349   -0.950904
 C     -0.845457   -3.133344    0.632709
 H      0.123701   -3.417535    0.232410
 C     -0.925289   -2.364655    1.825018
 C     -2.191686   -1.868590    2.157923
 H     -2.317876   -1.175513    2.987184
 C     -3.353921   -2.260696    1.437984
 H     -4.316174   -1.847370    1.731666
 C      2.187881   -0.948665   -1.866209
 C      2.743098   -1.794225   -0.907791
 C      2.977122   -0.071821   -2.602028
 C      4.111320   -1.747451   -0.673617
 H      2.109908   -2.477116   -0.341758
 C      4.349113   -0.036953   -2.364682
 H      2.521812    0.578624   -3.346575
 C      4.913013   -0.867761   -1.400628
 H      4.554565   -2.401653    0.075652
 H      4.976953    0.647046   -2.933348
 H     -3.134229    0.684038    1.000581
 H     -3.753814   -0.769320   -3.667137
 C     -3.375699   -0.444469   -2.670084
 O     -3.087031   -1.392042   -1.878296
 O     -3.288185    0.780463   -2.459148
 H     -2.884503    0.864399   -0.647020
 Fe    -1.920606   -1.298012   -0.047731
 H      5.985210   -0.832368   -1.214300
 C      0.300334   -1.931926    2.528782
 C      0.319862   -0.766138    3.308875
 C      1.488036   -2.664294    2.399308
 C      1.492341   -0.336246    3.917797
 H     -0.580194   -0.163948    3.426709
 C      2.661518   -2.232024    3.007501
 H      1.497884   -3.594379    1.832034
 C      2.670518   -1.063308    3.764009
 H      1.485922    0.579918    4.506613
 H      3.571623   -2.819421    2.895821
 H      3.590430   -0.723131    4.236769
 H     -4.158520   -3.482802   -0.148089
80
5'g Gsolv= -2324.181222
 O     -0.873446   -1.945106   -2.282628
 O      0.494468   -0.088066   -3.272951
 S      0.227389   -0.979581   -2.125759
 N     -0.020728   -0.142048   -0.762831
 C      0.823989    1.061014   -0.615131
 H      0.732923    1.704702   -1.508730
 C      0.222038    1.828883    0.563138
 H      0.350213    1.215779    1.468081
 N     -1.228516    1.896034    0.299084
 C      0.872312    3.167115    0.789439
 C      1.705062    3.345453    1.895576
 H      1.844387    2.519058    2.596227
 C      2.358730    4.556531    2.102313
 H      3.005919    4.682435    2.969160
 C      2.182873    5.603424    1.201919
 H      2.691475    6.553100    1.361822
 C      1.354016    5.433118    0.094921
 H      1.215496    6.248721   -0.613515
 C      0.704338    4.220612   -0.113738
 H      0.065152    4.094822   -0.989614
 C      2.289031    0.782930   -0.375188
 C      3.258171    1.463503   -1.110577
 H      2.944490    2.171436   -1.880300
 C      4.613302    1.240121   -0.874880
 H      5.360632    1.774937   -1.459745
 C      5.009408    0.331390    0.101926
 H      6.068049    0.151753    0.284957
 C      4.045192   -0.350155    0.845091
 H      4.347040   -1.065992    1.610235
 C      2.694427   -0.123870    0.607900
 H      1.941451   -0.671543    1.176690
 C     -4.071747   -0.678542    0.416885
 C     -3.243499   -1.709451   -0.072921
 H     -3.522117   -2.235730   -0.985812
 C     -2.051801   -2.065097    0.583855
 H     -1.439156   -2.843610    0.136046
 C     -1.648316   -1.444166    1.796810
 C     -2.375323   -0.307662    2.164738
 H     -2.060961    0.307345    3.005705
 C     -3.556511    0.081556    1.471809
 H     -4.072520    0.976498    1.814464
 C      1.698860   -1.968190   -1.902640
 C      1.661716   -3.006520   -0.973774
 C      2.851273   -1.686884   -2.627635
 C      2.804978   -3.766346   -0.761450
 H      0.749946   -3.213765   -0.412912
 C      3.991466   -2.456557   -2.409846
 H      2.856614   -0.872222   -3.349453
 C      3.969175   -3.490159   -1.477863
 H      2.787707   -4.580854   -0.038909
 H      4.900368   -2.243522   -2.970188
 H     -1.718043    2.364597    1.065215
 C     -5.378774   -0.369164   -0.263466
 H     -5.252083   -0.619378   -1.328645
 C     -6.451396   -1.292250    0.316808
 H     -7.411921   -1.127030   -0.189354
 H     -6.182151   -2.350929    0.200938
 H     -6.593253   -1.092003    1.389256
 C     -5.803944    1.086599   -0.153053
 H     -5.020256    1.771389   -0.506767
 H     -6.701754    1.257648   -0.760942
 H     -6.057150    1.357364    0.882097
 H     -2.982090    1.587560   -3.662318
 C     -2.538083    1.638191   -2.640944
 O     -2.838773    0.668720   -1.882883
 O     -1.819870    2.622037   -2.375447
 H     -1.420033    2.404523   -0.583698
 Fe    -1.869124    0.067071   -0.028265
 H      4.864043   -4.086831   -1.308129
 C     -0.397882   -1.837440    2.477472
 C      0.312836   -0.932726    3.280475
 C      0.124279   -3.126430    2.307156
 C      1.515668   -1.298599    3.872066
 H     -0.056133    0.081553    3.429950
 C      1.328456   -3.491352    2.899387
 H     -0.422698   -3.863491    1.720035
 C      2.033037   -2.577351    3.678046
 H      2.056975   -0.573828    4.478659
 H      1.711790   -4.500792    2.758636
 H      2.978195   -2.861973    4.137653
78
TS2,3a-R Gsolv= -2284.397413
 O      -1.331248   -1.434082   -2.601893
 O       0.855140   -0.265997   -2.971285
 S       0.088237   -1.291818   -2.232707
 N       0.192906   -1.072106   -0.629233
 C       1.428390   -0.414513   -0.156186
 H       1.554853    0.558831   -0.658984
 C       1.187319   -0.119976    1.324290
 H       1.112485   -1.073144    1.871366
 N      -0.153951    0.502272    1.383680
 C       2.288985    0.712407    1.926555
 C       3.164244    0.140926    2.850957
 H       3.012702   -0.893909    3.162156
 C       4.227605    0.876374    3.367456
 H       4.902352    0.418300    4.089405
 C       4.427871    2.192267    2.959952
 H       5.260936    2.767720    3.361276
 C       3.559332    2.769698    2.036092
 H       3.710427    3.796982    1.705270
 C       2.496026    2.034698    1.522239
 H       1.823541    2.502492    0.802407
 C       2.687817   -1.216854   -0.371240
 C       3.731782   -0.675062   -1.121334
 H       3.621819    0.328638   -1.538504
 C       4.894793   -1.406819   -1.348450
 H       5.700061   -0.975054   -1.941283
 C       5.024418   -2.688418   -0.821314
 H       5.931238   -3.264313   -1.000991
 C       3.990007   -3.233023   -0.061464
 H       4.088301   -4.234727    0.355122
 C       2.828916   -2.501475    0.161925
 H       2.014524   -2.938714    0.742683
 C      -3.723461   -0.762483    0.853711
 C      -3.312927   -1.690019   -0.125291
 H      -3.752396   -1.676574   -1.119704
 C      -2.329316   -2.661498    0.159721
 H      -2.033120   -3.354197   -0.627212
 C      -1.735405   -2.766914    1.437272
 C      -1.993163   -1.721310    2.329971
 H      -1.438117   -1.657816    3.265832
 C      -2.964186   -0.720394    2.033194
 H      -3.130405    0.080998    2.754082
 H      -1.965908    0.743352   -0.461160
 H      -0.142003    1.403122    0.878463
 H      -0.425043    0.689976    2.352374
 C      -1.408667    2.357905   -1.029223
 O      -0.239598    2.579202   -0.591978
 C      -4.832985    0.235185    0.634525
 H      -4.459925    1.216069    0.973171
 C      -5.280587    0.355297   -0.813035
 H      -6.001874    1.176998   -0.910869
 H      -4.443776    0.561755   -1.494671
 H      -5.779807   -0.564387   -1.152104
 C      -6.016505   -0.149739    1.524203
 H      -5.738720   -0.181097    2.586095
 H      -6.831728    0.576855    1.407383
 H      -6.404067   -1.140431    1.244268
 Fe     -1.410482   -0.697254    0.462629
 C      -2.575487    2.838513   -0.212574
 H       3.591311    3.453163   -2.454149
 C       2.676640    3.451960   -1.837275
 O       1.822817    2.540978   -2.259405
 O       2.497858    4.203927   -0.899637
 H       1.002514    2.549495   -1.664621
 O      -3.682247    3.075375   -0.663194
 O      -2.258968    3.013825    1.079074
 H      -3.057542    3.337388    1.539464
 C      -1.649334    2.167053   -2.495731
 H      -0.900913    1.476875   -2.905988
 H      -2.652240    1.786315   -2.714255
 H      -1.528070    3.138894   -2.999910
 C      -0.723798   -3.825504    1.723343
 H      -1.224634   -4.767738    1.987526
 H      -0.104004   -4.027109    0.839228
 H      -0.072346   -3.547344    2.560589
 C       0.844167   -2.858839   -2.623393
 H       1.921522   -2.809960   -2.431459
 H       0.380445   -3.639018   -2.009046
 H       0.660699   -3.054634   -3.686242
78
TS2,3a-S Gsolv= -2284.396532
 O     -1.276955   -1.005756   -2.735588
 O      1.142566   -0.422165   -2.971415
 S      0.115928   -1.222875   -2.267206
 N      0.191060   -1.044069   -0.672261
 C      1.431999   -0.434948   -0.166965
 H      1.580958    0.559355   -0.621841
 C      1.203628   -0.196764    1.330161
 H      1.087648   -1.172591    1.828350
 N     -0.102419    0.486332    1.447733
 C      2.349594    0.555722    1.957441
 C      3.276353   -0.120212    2.752919
 H      3.124661   -1.178886    2.969242
 C      4.393333    0.540436    3.256616
 H      5.108060   -0.000687    3.875211
 C      4.597335    1.887288    2.968568
 H      5.473397    2.403508    3.358579
 C      3.674617    2.571400    2.180733
 H      3.822591    3.625007    1.944960
 C      2.557441    1.909840    1.681330
 H      1.847290    2.467247    1.069694
 C      2.697265   -1.231580   -0.382217
 C      3.820408   -0.608401   -0.927745
 H      3.745233    0.434901   -1.244942
 C      5.019967   -1.300721   -1.064895
 H      5.889248   -0.801206   -1.490834
 C      5.105834   -2.630961   -0.662232
 H      6.042846   -3.175816   -0.769426
 C      3.986958   -3.263923   -0.124205
 H      4.048124   -4.304740    0.191693
 C      2.790200   -2.567386    0.016337
 H      1.916460   -3.064155    0.442532
 C     -3.871413   -0.655587    1.159259
 C     -3.484635   -1.244922   -0.076192
 H     -3.966799   -0.944843   -1.004836
 C     -2.561801   -2.311732   -0.113166
 H     -2.360219   -2.807224   -1.061767
 C     -1.910379   -2.751383    1.062316
 C     -2.110550   -1.989151    2.215898
 H     -1.523379   -2.207328    3.108327
 C     -3.113621   -0.988839    2.276235
 H     -3.273502   -0.460489    3.216295
 H     -2.079625    0.979010    0.085463
 H     -0.046295    1.430686    1.045938
 H     -0.355027    0.597990    2.433141
 C     -1.615497    2.795370   -0.531935
 O     -0.431699    2.992188   -0.228085
 C     -1.944551    2.087197   -1.840892
 C     -4.964475    0.382530    1.274983
 H     -4.510925    1.273352    1.744906
 C     -5.573875    0.794199   -0.055384
 H     -6.311961    1.591028    0.106404
 H     -4.827200    1.168804   -0.768359
 H     -6.100586   -0.049225   -0.526837
 C     -6.060148   -0.133846    2.208906
 H     -5.675351   -0.381052    3.206598
 H     -6.845676    0.624464    2.329278
 H     -6.526453   -1.038548    1.791542
 C     -0.948475   -3.892521    1.034281
 H     -1.492781   -4.847645    1.055192
 H     -0.340462   -3.885624    0.120395
 H     -0.278893   -3.873634    1.903281
 Fe    -1.476071   -0.522248    0.460949
 O     -0.836159    1.725635   -2.470412
 H     -1.070124    1.074796   -3.167881
 O     -3.069357    1.906738   -2.265905
 C     -2.737184    3.464236    0.186715
 H     -2.804335    4.495401   -0.194136
 H     -3.702909    2.978325    0.020720
 H     -2.514349    3.517819    1.258046
 H      3.637044    3.486060   -1.834676
 C      2.655199    3.560872   -1.338483
 O      1.818080    2.658504   -1.819114
 O      2.391654    4.368784   -0.472105
 H      0.941676    2.733350   -1.346507
 C      0.461834   -2.926705   -2.658448
 H      1.473743   -3.176144   -2.320047
 H     -0.275993   -3.568144   -2.163947
 H      0.389178   -3.043000   -3.746068
88
TS2,3b-R Gsolv= -2515.196738
 O     -0.803518   -2.167839   -1.565919
 O      0.796488   -0.463951   -2.492206
 S      0.402539   -1.335207   -1.363806
 N      0.208988   -0.546962    0.024264
 C      1.033005    0.659743    0.170833
 H      0.872237    1.334670   -0.688231
 C      0.561469    1.416149    1.425176
 H      0.806390    0.804410    2.306838
 N     -0.904069    1.529372    1.383282
 C      1.289917    2.737042    1.524057
 C      2.306999    2.925417    2.460414
 H      2.534370    2.129787    3.172074
 C      3.042173    4.108588    2.481245
 H      3.834077    4.239557    3.217720
 C      2.771513    5.117716    1.560968
 H      3.351817    6.039292    1.572827
 C      1.753089    4.941728    0.626276
 H      1.528923    5.721979   -0.101514
 C      1.017591    3.762271    0.613789
 H      0.224703    3.637742   -0.123217
 C      2.515586    0.366387    0.272203
 C      3.425309    1.023205   -0.556571
 H      3.055286    1.736806   -1.295550
 C      4.791438    0.766815   -0.453864
 H      5.490044    1.286087   -1.109014
 C      5.260846   -0.155045    0.477046
 H      6.327679   -0.361310    0.554245
 C      4.357786   -0.816511    1.309159
 H      4.717907   -1.542750    2.037797
 C      2.996432   -0.552505    1.209869
 H      2.291522   -1.082000    1.853937
 C     -3.627070   -1.624016    0.850599
 C     -2.561846   -2.510378    1.077349
 H     -2.421683   -3.369161    0.422301
 C     -1.566505   -2.199628    2.015014
 H     -0.672795   -2.819058    2.088069
 C     -1.699451   -1.088455    2.887300
 C     -2.864902   -0.300913    2.779221
 H     -2.980852    0.568616    3.426279
 C     -3.759735   -0.503189    1.731790
 H     -4.598862    0.177099    1.589179
 H     -2.132918    0.375940   -0.626699
 C      1.748039   -2.484219   -1.136546
 C      1.590900   -3.523018   -0.220153
 C      2.949224   -2.308468   -1.813284
 C      2.656377   -4.376289    0.028819
 H      0.639439   -3.664864    0.293994
 C      4.009766   -3.168868   -1.549798
 H      3.057879   -1.498454   -2.532151
 C      3.884853   -4.204647   -0.620926
 H      2.539668   -5.191953    0.743096
 H      4.956837   -3.030372   -2.072574
 C      5.047206   -5.092287   -0.302369
 H      5.731666   -5.183584   -1.154896
 H      5.629155   -4.684930    0.537873
 H      4.720240   -6.098149   -0.010261
 H     -1.191947    2.206970    0.667479
 H     -1.246475    1.880379    2.279097
 C     -2.447859    1.699399   -1.545412
 O     -1.785979    2.678292   -1.126376
 C     -3.890820    1.572607   -1.069418
 O     -4.124440    2.301120    0.019591
 O     -4.730782    0.916003   -1.648730
 C     -2.150460    1.081892   -2.878397
 H     -2.551611    0.069175   -2.985293
 H     -2.614702    1.718481   -3.647743
 H     -1.067909    1.070610   -3.040708
 H      1.614782    4.480109   -3.374150
 C      0.932052    3.743094   -2.920707
 O     -0.206819    4.307775   -2.567772
 O      1.207179    2.569184   -2.774363
 H     -0.795325    3.621951   -2.131418
 H     -5.062661    2.185178    0.271195
 C     -0.671233   -0.817044    3.935684
 H      0.328782   -1.125987    3.604546
 H     -0.643284    0.245230    4.209576
 H     -0.901255   -1.385532    4.848601
 C     -4.718994   -1.912084   -0.149765
 H     -5.260560   -0.968515   -0.316991
 C     -4.214882   -2.412829   -1.494804
 H     -5.061244   -2.544771   -2.182373
 H     -3.511592   -1.706229   -1.954880
 H     -3.710441   -3.386156   -1.407623
 C     -5.691032   -2.913591    0.474621
 H     -6.088987   -2.548622    1.431763
 H     -6.539066   -3.096953   -0.198969
 H     -5.191564   -3.876436    0.659720
 Fe    -1.725402   -0.413497    0.737839
88
TS2,3b-S Gsolv= -2515.190708
 O       0.319605   -2.166389    1.909325
 O      -1.101680   -0.187461    2.523940
 S      -0.729803   -1.203188    1.514185
 N      -0.310276   -0.550520    0.108521
 C      -0.960617    0.732127   -0.199906
 H      -0.750728    1.466515    0.598519
 C      -0.281435    1.263183   -1.466190
 H      -0.499924    0.577631   -2.300383
 N       1.177203    1.178445   -1.227538
 C      -0.761693    2.647949   -1.818830
 C      -1.606933    2.837710   -2.912939
 H      -1.870362    1.983923   -3.539279
 C      -2.121918    4.098900   -3.200194
 H      -2.780387    4.231655   -4.057570
 C      -1.798211    5.185574   -2.392469
 H      -2.203175    6.171917   -2.614503
 C      -0.954659    5.005307   -1.298387
 H      -0.698456    5.846554   -0.654799
 C      -0.439297    3.744911   -1.014696
 H       0.219602    3.623888   -0.153970
 C      -2.459962    0.669393   -0.382463
 C      -3.282264    1.528393    0.346905
 H      -2.826413    2.223458    1.056720
 C      -4.665831    1.493899    0.186514
 H      -5.296096    2.168529    0.764761
 C      -5.240103    0.593866   -0.706606
 H      -6.321786    0.560558   -0.830651
 C      -4.424793   -0.266483   -1.442024
 H      -4.869396   -0.974786   -2.141019
 C      -3.043924   -0.225501   -1.283354
 H      -2.409600   -0.905529   -1.855285
 C       3.837222   -1.695208   -1.211006
 C       2.919391   -2.431060   -0.408795
 H       3.216325   -2.794969    0.572712
 C       1.660090   -2.819503   -0.915509
 H       1.024863   -3.467146   -0.314437
 C       1.222166   -2.378820   -2.184200
 C       2.020714   -1.426019   -2.828017
 H       1.652007   -0.947632   -3.735756
 C       3.338680   -1.137722   -2.381522
 H       3.954605   -0.449426   -2.961045
 H       2.624706    0.010806    0.475543
 C      -2.206692   -2.182167    1.268458
 C      -2.132374   -3.348055    0.508472
 C      -3.428218   -1.746730    1.771632
 C      -3.292806   -4.057328    0.227838
 H      -1.171497   -3.707463    0.140603
 C      -4.582041   -2.468419    1.486388
 H      -3.477687   -0.843902    2.377135
 C      -4.536107   -3.622721    0.700615
 H      -3.236600   -4.969775   -0.366673
 H      -5.540836   -2.124965    1.877086
 C      -5.790517   -4.361523    0.352197
 H      -6.537991   -4.287190    1.152139
 H      -6.249181   -3.944891   -0.556935
 H      -5.594486   -5.423490    0.158520
 H       1.445960    1.844036   -0.491961
 H       1.685160    1.450820   -2.073296
 C       3.003231    1.739202    1.500137
 O       2.054800    2.498996    1.283904
 C       2.904212    0.715518    2.623623
 C       5.265881   -1.430736   -0.799897
 H       5.451218   -0.353186   -0.950575
 C       5.576766   -1.782111    0.645817
 H       6.605644   -1.482813    0.885922
 H       4.907392   -1.281135    1.358594
 H       5.505207   -2.866843    0.815224
 C       6.197838   -2.202218   -1.736710
 H       6.047221   -1.924407   -2.788131
 H       7.247288   -2.004176   -1.479691
 H       6.026100   -3.284938   -1.643797
 C      -0.103786   -2.789867   -2.733698
 H      -0.046418   -3.813383   -3.131014
 H      -0.881391   -2.788968   -1.958619
 H      -0.420869   -2.132176   -3.552284
 Fe      1.650095   -0.662596   -0.676028
 O       1.668202    0.641387    3.093580
 H       1.626322   -0.044083    3.790059
 O       3.854370    0.094416    3.055312
 C       4.339698    1.941770    0.874808
 H       4.834686    2.770475    1.404502
 H       4.981143    1.058896    0.947538
 H       4.216710    2.242593   -0.172744
 H      -1.584480    4.315682    2.935970
 C      -0.600746    4.070670    2.502339
 O      -0.332820    2.784896    2.648521
 O       0.127548    4.883058    1.971013
 H       0.555502    2.584062    2.241031
87
TS2,3c-R Gsolv= -2680.341950
 O      0.045330   -2.250353   -1.767102
 O      0.760760    0.034876   -2.518540
 S      0.737633   -0.989720   -1.457541
 N      0.176191   -0.418785   -0.061048
 C      0.491591    1.001115    0.205556
 H      0.132391    1.627047   -0.628696
 C     -0.339509    1.379239    1.432492
 H      0.020448    0.800513    2.298046
 N     -1.709232    0.901692    1.143612
 C     -0.252148    2.851073    1.742739
 C      0.473864    3.285503    2.852497
 H      0.929942    2.548201    3.515086
 C      0.627247    4.644965    3.110209
 H      1.195770    4.969808    3.980560
 C      0.057398    5.585043    2.256120
 H      0.179029    6.648922    2.454997
 C     -0.667990    5.159428    1.145559
 H     -1.112169    5.886580    0.466282
 C     -0.822742    3.800765    0.890122
 H     -1.393015    3.486790    0.014994
 C      1.956420    1.300113    0.414226
 C      2.568692    2.299238   -0.342833
 H      1.978549    2.840651   -1.086160
 C      3.918692    2.594568   -0.168070
 H      4.385670    3.374363   -0.768214
 C      4.669508    1.886463    0.765908
 H      5.727296    2.109026    0.899729
 C      4.062621    0.890836    1.531579
 H      4.646133    0.335936    2.265670
 C      2.712646    0.604140    1.361700
 H      2.243253   -0.179213    1.960472
 C     -3.432122   -2.533723    0.938965
 C     -2.274517   -3.123114    0.385811
 H     -2.321155   -3.647189   -0.566081
 C     -1.040728   -3.085891    1.067649
 H     -0.182829   -3.579626    0.615786
 C     -0.900698   -2.440128    2.314354
 C     -1.987055   -1.664638    2.737197
 H     -1.884464   -1.016793    3.607724
 C     -3.238873   -1.715054    2.058126
 H     -4.063384   -1.105063    2.429686
 H     -2.600399   -0.617215   -0.764754
 C      2.454993   -1.442428   -1.188816
 C      2.736272   -2.505665   -0.331340
 C      3.468314   -0.709449   -1.797473
 C      4.054524   -2.829862   -0.057577
 H      1.932805   -3.078543    0.127707
 C      4.792871   -1.023018   -1.524027
 H      3.226141    0.108542   -2.471542
 C      5.058564   -2.075171   -0.656763
 H      4.305403   -3.650835    0.607721
 H      5.606092   -0.462444   -1.976320
 H     -2.094604    1.417673    0.336466
 H     -2.326333    1.070684    1.942537
 C     -3.049147    0.746151   -1.850964
 O     -2.465554    1.799823   -1.472436
 C     -4.801925   -2.662863    0.321422
 H     -5.248549   -1.654765    0.299966
 C     -4.793665   -3.224951   -1.090733
 H     -5.807585   -3.188215   -1.509842
 H     -4.133993   -2.658360   -1.762195
 H     -4.471650   -4.276719   -1.097903
 C     -5.662701   -3.538566    1.234416
 H     -5.740942   -3.122537    2.247588
 H     -6.677712   -3.631635    0.825473
 H     -5.236125   -4.549424    1.313646
 Fe    -1.622513   -1.000967    0.658506
 C     -4.434340    0.473491   -1.322384
 H      0.376948    4.633518   -3.148740
 C     -0.490245    4.132456   -2.686346
 O     -0.387572    2.821545   -2.787935
 O     -1.410550    4.727679   -2.162363
 H     -1.183739    2.389024   -2.339952
 O     -5.258369   -0.218162   -1.890792
 O     -4.675953    1.110784   -0.169791
 H     -5.593293    0.908214    0.099182
 C     -2.689429    0.088384   -3.147031
 H     -1.598436    0.069877   -3.258632
 H     -3.083630   -0.929690   -3.228433
 H     -3.106864    0.688835   -3.970551
 C      0.409521   -2.425339    3.028516
 H      0.541229   -3.355723    3.598929
 H      1.247125   -2.359665    2.320672
 H      0.474916   -1.589201    3.735311
 N      6.449400   -2.402607   -0.360282
 O      7.325772   -1.727682   -0.881318
 O      6.674261   -3.336194    0.396836
87
TS2,3c-S Gsolv= -2680.337238
 O     -0.040144   -2.078403    1.897222
 O     -0.894504    0.205731    2.508521
 S     -0.768944   -0.860229    1.495198
 N     -0.178334   -0.344187    0.100737
 C     -0.454327    1.069647   -0.209121
 H     -0.065900    1.716596    0.597244
 C      0.359166    1.401123   -1.464138
 H     -0.028323    0.805952   -2.306211
 N      1.737352    0.923843   -1.213490
 C      0.279648    2.867140   -1.806295
 C     -0.490212    3.293499   -2.889321
 H     -0.986352    2.552598   -3.518164
 C     -0.636736    4.650714   -3.162730
 H     -1.240473    4.969137   -4.011496
 C     -0.015338    5.597043   -2.352447
 H     -0.132400    6.659054   -2.563638
 C      0.757322    5.179756   -1.270962
 H      1.245286    5.911395   -0.627491
 C      0.905133    3.823178   -1.000962
 H      1.517368    3.513840   -0.152433
 C     -1.913992    1.404228   -0.410639
 C     -2.495359    2.440648    0.319691
 H     -1.885255    2.988927    1.041813
 C     -3.838266    2.766450    0.142292
 H     -4.281330    3.575675    0.721410
 C     -4.612489    2.054501   -0.769798
 H     -5.663788    2.304112   -0.907242
 C     -4.037121    1.019804   -1.507255
 H     -4.638595    0.459756   -2.222747
 C     -2.695670    0.699616   -1.330585
 H     -2.249681   -0.115088   -1.904132
 C      3.520191   -2.517693   -1.187183
 C      2.440404   -3.018825   -0.407602
 H      2.626265   -3.465845    0.566977
 C      1.126326   -3.059166   -0.924237
 H      0.344123   -3.536201   -0.337049
 C      0.821631   -2.491980   -2.180733
 C      1.839211   -1.754058   -2.799454
 H      1.611322   -1.174194   -3.694101
 C      3.184136   -1.814300   -2.339160
 H      3.956290   -1.281545   -2.894919
 H      2.780210   -0.583792    0.519411
 C     -2.457968   -1.410156    1.205985
 C     -2.672525   -2.556530    0.441288
 C     -3.522162   -0.658797    1.696025
 C     -3.966536   -2.939942    0.129635
 H     -1.832862   -3.153278    0.089943
 C     -4.823007   -1.034442    1.391822
 H     -3.335161    0.221495    2.305930
 C     -5.018978   -2.163745    0.606390
 H     -4.163019   -3.825854   -0.467365
 H     -5.671652   -0.460460    1.753540
 H      2.167993    1.484540   -0.466749
 H      2.308659    1.057014   -2.052212
 C      3.544595    0.924909    1.544300
 O      2.842721    1.920580    1.324806
 C      3.155686   -0.036114    2.657838
 C      4.966476   -2.628685   -0.768903
 H      5.413106   -1.626297   -0.884997
 C      5.170563   -3.092848    0.663954
 H      6.240405   -3.069022    0.910389
 H      4.644809   -2.463066    1.394860
 H      4.828771   -4.129934    0.798121
 C      5.684195   -3.575889   -1.732865
 H      5.613377   -3.235145   -2.774136
 H      6.748421   -3.651033   -1.471592
 H      5.250297   -4.585166   -1.675171
 C     -0.561739   -2.537286   -2.739611
 H     -0.779731   -3.543491   -3.124850
 H     -1.315480   -2.316282   -1.972838
 H     -0.684005   -1.828370   -3.567418
 Fe     1.697730   -0.978603   -0.676201
 O      1.945239    0.238210    3.122121
 H      1.705598   -0.420139    3.804221
 O      3.885680   -0.906686    3.088534
 C      4.908757    0.784542    0.959810
 H      5.579315    1.460548    1.512732
 H      5.305436   -0.231398    1.038860
 H      4.898445    1.110930   -0.087327
 H     -0.150854    4.696142    2.891768
 C      0.741044    4.180847    2.498166
 O      0.623466    2.871845    2.637212
 O      1.694486    4.752778    2.011810
 H      1.430750    2.422187    2.257916
 N     -6.383024   -2.556822    0.274167
 O     -6.545819   -3.553205   -0.416527
 O     -7.302823   -1.872089    0.699819
85
TS2,3d-R Gsolv= -2575.156660
 O     -0.284420   -2.323023   -1.769718
 O      0.969329   -0.281539   -2.517875
 S      0.713620   -1.283975   -1.463809
 N      0.309832   -0.591247   -0.057887
 C      0.950304    0.716335    0.194294
 H      0.732305    1.409385   -0.636023
 C      0.245904    1.280244    1.428979
 H      0.473864    0.638218    2.294886
 N     -1.198723    1.122566    1.153912
 C      0.673071    2.693369    1.729480
 C      1.502732    2.948967    2.822311
 H      1.789570    2.126477    3.479612
 C      1.971522    4.236119    3.070042
 H      2.617726    4.421037    3.927086
 C      1.615961    5.282455    2.223310
 H      1.983859    6.289598    2.414370
 C      0.789059    5.035420    1.129824
 H      0.510003    5.845450    0.456444
 C      0.319669    3.749169    0.883922
 H     -0.326257    3.576471    0.022359
 C      2.447462    0.670260    0.379557
 C      3.262483    1.501284   -0.388944
 H      2.803078    2.159345   -1.130588
 C      4.645857    1.485984   -0.224494
 H      5.271772    2.137158   -0.833322
 C      5.225196    0.635892    0.712748
 H      6.306729    0.618497    0.840772
 C      4.416539   -0.194777    1.488598
 H      4.865424   -0.863125    2.222715
 C      3.036172   -0.175612    1.323355
 H      2.405671   -0.833140    1.924605
 C     -3.627634   -1.826711    0.976878
 C     -2.642670   -2.686356    0.447884
 H     -2.808072   -3.202516   -0.494950
 C     -1.435802   -2.921511    1.138790
 H     -0.712605   -3.610101    0.705714
 C     -1.159734   -2.312894    2.381560
 C     -2.036044   -1.298517    2.784443
 H     -1.791013   -0.682206    3.649467
 C     -3.253921   -1.055997    2.086483
 H     -3.913140   -0.262211    2.439846
 H     -2.440907   -0.158323   -0.727107
 C      2.259706   -2.145106   -1.223930
 C      2.297460   -3.219963   -0.336117
 C      3.403964   -1.726302   -1.895491
 C      3.497329   -3.875861   -0.103269
 H      1.395180   -3.547014    0.179334
 C      4.610000   -2.380576   -1.669320
 H      3.355952   -0.889886   -2.589387
 C      4.631089   -3.436931   -0.773297
 H      3.565797   -4.717399    0.582296
 H      5.525252   -2.080028   -2.174416
 H     -1.462624    1.699003    0.337816
 H     -1.757285    1.438029    1.951172
 C     -2.551610    1.252610   -1.839314
 O     -1.741895    2.148243   -1.460323
 C     -4.984369   -1.638301    0.346683
 H     -5.178093   -0.553772    0.306191
 C     -5.100029   -2.211343   -1.056246
 H     -6.071269   -1.938675   -1.489072
 H     -4.316671   -1.834822   -1.728206
 H     -5.041837   -3.309705   -1.042553
 C     -6.035094   -2.268031    1.263434
 H     -6.019024   -1.827433    2.269124
 H     -7.040164   -2.124056    0.844781
 H     -5.862025   -3.349806    1.362892
 Fe    -1.532494   -0.758526    0.697729
 C     -3.967267    1.315292   -1.332306
 H      1.591154    4.310313   -3.186102
 C      0.649770    3.998062   -2.702703
 O      0.472307    2.696446   -2.811053
 O     -0.111250    4.769694   -2.153144
 H     -0.387210    2.436515   -2.343536
 O     -4.922801    0.824082   -1.905204
 O     -4.073625    2.005121   -0.188088
 H     -5.016037    2.009237    0.070877
 C     -2.337605    0.523545   -3.129878
 H     -1.284881    0.225898   -3.214078
 H     -2.976782   -0.359998   -3.226636
 H     -2.565966    1.209593   -3.960815
 C      0.105963   -2.601904    3.117402
 H     -0.016631   -3.498007    3.742344
 H      0.934122   -2.803020    2.424884
 H      0.386753   -1.772952    3.778425
 F      5.789966   -4.065339   -0.547575
85
TS2,3d-S Gsolv= -2575.150117
 O      0.343227   -2.167706    1.900335
 O     -1.121731   -0.220091    2.516861
 S     -0.720134   -1.221269    1.504909
 N     -0.308941   -0.555930    0.104426
 C     -0.982679    0.715497   -0.201319
 H     -0.790455    1.449599    0.601583
 C     -0.309496    1.264890   -1.463034
 H     -0.513821    0.579630   -2.300961
 N      1.150045    1.205341   -1.222648
 C     -0.815578    2.642048   -1.809349
 C     -1.663149    2.820754   -2.903526
 H     -1.908309    1.965443   -3.535177
 C     -2.204106    4.072611   -3.183727
 H     -2.864381    4.196752   -4.040995
 C     -1.904166    5.160851   -2.368996
 H     -2.329815    6.139737   -2.585298
 C     -1.058179    4.991640   -1.275023
 H     -0.820372    5.834043   -0.625888
 C     -0.516946    3.740559   -0.998260
 H      0.142635    3.628210   -0.136946
 C     -2.479362    0.621774   -0.391047
 C     -3.324052    1.463978    0.332135
 H     -2.887808    2.170402    1.042968
 C     -4.705578    1.399677    0.162870
 H     -5.353785    2.061340    0.736217
 C     -5.254893    0.486978   -0.733112
 H     -6.334789    0.430965   -0.864262
 C     -4.416977   -0.356907   -1.462055
 H     -4.841609   -1.074605   -2.163519
 C     -3.038523   -0.286895   -1.293952
 H     -2.386196   -0.954580   -1.860082
 C      3.862424   -1.621841   -1.213853
 C      2.957806   -2.378986   -0.416853
 H      3.260267   -2.743102    0.562888
 C      1.706192   -2.787470   -0.926693
 H      1.083855   -3.451627   -0.330327
 C      1.260782   -2.347583   -2.192790
 C      2.041429   -1.375689   -2.830065
 H      1.664477   -0.898504   -3.735025
 C      3.353678   -1.066051   -2.381092
 H      3.956535   -0.362204   -2.955667
 H      2.615793    0.056875    0.480145
 C     -2.177239   -2.231020    1.250183
 C     -2.068568   -3.396730    0.492678
 C     -3.409994   -1.815859    1.745128
 C     -3.203853   -4.141130    0.203109
 H     -1.097859   -3.732688    0.130443
 C     -4.552390   -2.557257    1.464240
 H     -3.481220   -0.910524    2.343861
 C     -4.425589   -3.699509    0.691054
 H     -3.154830   -5.054918   -0.384789
 H     -5.531475   -2.258016    1.832201
 H      1.407256    1.872730   -0.484351
 H      1.653895    1.489217   -2.067067
 C      2.957210    1.775850    1.509457
 O      1.998085    2.522887    1.292887
 C      2.869570    0.748265    2.629951
 C      5.285244   -1.331433   -0.799931
 H      5.448205   -0.249215   -0.942366
 C      5.602249   -1.686842    0.643425
 H      6.624640   -1.368433    0.886595
 H      4.922205   -1.204613    1.359074
 H      5.552548   -2.773965    0.805130
 C      6.233900   -2.075884   -1.741768
 H      6.078095   -1.793577   -2.791226
 H      7.278658   -1.857114   -1.482471
 H      6.085543   -3.162694   -1.656984
 C     -0.054503   -2.782588   -2.749112
 H      0.033183   -3.791673   -3.176759
 H     -0.828840   -2.828806   -1.972333
 H     -0.394701   -2.112021   -3.547747
 Fe     1.655399   -0.629830   -0.677569
 O      1.633144    0.656245    3.096208
 H      1.599620   -0.030610    3.791809
 O      3.826523    0.138761    3.063181
 C      4.293822    2.005348    0.893493
 H      4.766869    2.845522    1.425150
 H      4.953245    1.136426    0.972758
 H      4.172527    2.301645   -0.155568
 H     -1.665391    4.275041    2.952496
 C     -0.678243    4.047917    2.516787
 O     -0.390687    2.765487    2.653959
 O      0.037131    4.875101    1.990638
 H      0.500914    2.580491    2.245392
 F     -5.523142   -4.412204    0.409625
73
TS2,3e-R Gsolv= -2318.904768
 O     -0.044313   -2.818106    1.432758
 O     -0.803543   -0.632584    2.400751
 S     -0.795138   -1.564499    1.255978
 N     -0.270370   -0.839435   -0.099339
 C     -0.611886    0.596343   -0.197005
 H     -0.222084    1.131624    0.684648
 C      0.159784    1.114972   -1.408683
 H     -0.238282    0.635831   -2.317230
 N      1.535679    0.605581   -1.232062
 C      0.067719    2.611824   -1.548504
 C     -0.696304    3.168812   -2.574908
 H     -1.183331    2.511130   -3.296653
 C     -0.845147    4.549166   -2.676892
 H     -1.442796    4.970791   -3.483912
 C     -0.232441    5.386938   -1.749151
 H     -0.349920    6.466902   -1.826774
 C      0.530821    4.838415   -0.720830
 H      1.009906    5.484092    0.014735
 C      0.680750    3.459087   -0.620983
 H      1.284159    3.047397    0.188886
 C     -2.086672    0.890690   -0.309767
 C     -2.686115    1.769237    0.592108
 H     -2.075993    2.222885    1.377227
 C     -4.046788    2.054379    0.502955
 H     -4.505519    2.738880    1.215330
 C     -4.817882    1.459505   -0.491389
 H     -5.883205    1.675965   -0.559612
 C     -4.223062    0.586427   -1.402245
 H     -4.823309    0.119456   -2.182448
 C     -2.864161    0.306855   -1.313490
 H     -2.402592   -0.387572   -2.018896
 C      3.303651   -2.653277   -1.255505
 C      2.230457   -3.389005   -0.716162
 C      0.998024   -3.446778   -1.402333
 H      0.181079   -4.025363   -0.979577
 C      0.827295   -2.758420   -2.618295
 C      1.827410   -1.885172   -3.051576
 H      1.662716   -1.236105   -3.908969
 C      3.076571   -1.835200   -2.362967
 H      2.370252   -1.051952    0.540689
 C     -2.494529   -2.037469    0.973192
 C     -2.776021   -2.910204   -0.076674
 C     -3.502446   -1.532574    1.786797
 C     -4.094954   -3.272263   -0.318444
 H     -1.974681   -3.286688   -0.713042
 C     -4.821705   -1.901312    1.534339
 H     -3.258588   -0.852343    2.600508
 C     -5.116659   -2.765724    0.484530
 H     -4.328198   -3.949775   -1.137938
 H     -5.620085   -1.507736    2.161227
 H      1.961086    1.021032   -0.384280
 H      2.124103    0.858016   -2.030517
 C      2.995131    0.062189    1.652302
 O      2.504752    1.219934    1.432979
 Fe     1.439046   -1.335313   -0.949775
 C      4.300123   -0.298590    0.998882
 H     -0.272915    3.838565    3.492185
 C      0.579996    3.403409    2.943495
 O      0.487990    2.091226    2.886810
 O      1.478552    4.068381    2.465454
 H      1.278929    1.719087    2.363878
 H      4.249144   -2.595226   -0.718720
 O      5.002589   -1.243122    1.318967
 O      4.608617    0.527468   -0.010741
 H      5.442712    0.210489   -0.409096
 C      2.663724   -0.678227    2.915499
 H      1.583143   -0.628719    3.098715
 H      2.974245   -1.727875    2.875886
 H      3.176960   -0.192713    3.760009
 H      2.347202   -3.918750    0.226242
 H     -0.137915   -2.776892   -3.122012
 H      3.848076   -1.149013   -2.706340
 H     -6.149732   -3.048106    0.288544
73
TS2,3e-S Gsolv= -2318.896886
 O      0.204556   -2.778245    1.317492
 O     -0.722085   -0.697751    2.373576
 S     -0.641567   -1.577238    1.191441
 N     -0.183402   -0.770380   -0.134325
 C     -0.603470    0.644774   -0.175145
 H     -0.187464    1.183882    0.693880
 C      0.056692    1.234825   -1.420850
 H     -0.379204    0.761101   -2.314572
 N      1.468872    0.797359   -1.364612
 C     -0.122352    2.728017   -1.504261
 C     -0.984284    3.275507   -2.455372
 H     -1.486203    2.615957   -3.165093
 C     -1.211855    4.648317   -2.496333
 H     -1.886259    5.062739   -3.244465
 C     -0.580643    5.487435   -1.582269
 H     -0.760352    6.561192   -1.611801
 C      0.280926    4.948213   -0.629351
 H      0.775779    5.595188    0.094496
 C      0.509251    3.576634   -0.590743
 H      1.190108    3.172695    0.159932
 C     -2.096669    0.863950   -0.190278
 C     -2.688580    1.667514    0.783543
 H     -2.058169    2.122253    1.551825
 C     -4.066006    1.875832    0.788249
 H     -4.517680    2.501539    1.556968
 C     -4.862503    1.279559   -0.185080
 H     -5.940393    1.436199   -0.180467
 C     -4.276734    0.482101   -1.168228
 H     -4.896408    0.014117   -1.932530
 C     -2.901497    0.278074   -1.171392
 H     -2.446663   -0.358727   -1.933405
 C      3.412087   -2.390542   -1.694359
 C      2.424029   -3.154659   -1.036257
 C      1.133323   -3.268753   -1.594318
 C      0.806611   -2.571366   -2.772594
 C      1.720703   -1.654087   -3.295900
 C      3.042693   -1.581254   -2.764002
 H      2.636597   -0.847883    0.101895
 C     -2.305322   -2.176669    0.914843
 C     -2.555962   -2.999821   -0.181595
 C     -3.322887   -1.812020    1.789806
 C     -3.849128   -3.454504   -0.406313
 H     -1.753673   -3.266909   -0.868999
 C     -4.616485   -2.271525    1.554733
 H     -3.105473   -1.165815    2.637938
 C     -4.879395   -3.088395    0.459494
 H     -4.055839   -4.094743   -1.262252
 H     -5.420787   -1.985761    2.230632
 H      1.936486    1.229177   -0.551421
 H      1.972477    1.101233   -2.202390
 C      3.519887    0.367977    1.110647
 O      2.797380    1.392551    1.221158
 C      3.356786   -0.795411    2.054022
 Fe     1.507270   -1.153332   -1.134049
 O      2.298290   -0.635366    2.850183
 H      2.197357   -1.441767    3.392626
 O      4.103461   -1.759984    2.104411
 C      4.783034    0.422450    0.309686
 H      5.511346    1.043506    0.853296
 H      5.226141   -0.564055    0.146421
 H      4.591401    0.908637   -0.655507
 H     -0.121182    3.565586    3.580105
 C      0.733107    3.228200    2.969008
 O      0.772292    1.912164    2.902322
 O      1.522691    3.985944    2.441212
 H      1.549591    1.623085    2.330018
 H      0.393321   -3.889582   -1.096877
 H     -0.204970   -2.622829   -3.172604
 H      1.439159   -1.005540   -4.122828
 H      3.752556   -0.876022   -3.191581
 H      4.410918   -2.316269   -1.269254
 H      2.663022   -3.682626   -0.115371
 H     -5.892600   -3.442732    0.277004
83
TS2,3f-R Gsolv= -2549.707993
 O      0.334186   -1.827644   -2.594950
 O     -0.340920    0.572890   -2.887945
 S      0.457381   -0.428533   -2.151969
 N      0.164951   -0.373015   -0.559333
 C     -0.126899    0.974142   -0.031359
 H     -0.963043    1.428095   -0.590336
 C     -0.613393    0.753650    1.401321
 H      0.225470    0.362785    1.996671
 N     -1.610085   -0.334245    1.318068
 C     -1.120562    2.020920    2.034468
 C     -0.356415    2.659855    3.012084
 H      0.578369    2.202286    3.343543
 C     -0.773128    3.872779    3.553107
 H     -0.168912    4.361417    4.316225
 C     -1.958517    4.459464    3.117817
 H     -2.283999    5.409878    3.538406
 C     -2.726602    3.827008    2.142449
 H     -3.652958    4.280153    1.790466
 C     -2.310344    2.613655    1.604333
 H     -2.923425    2.128855    0.843421
 C      1.040777    1.928774   -0.064608
 C      0.887475    3.197743   -0.620183
 H     -0.078395    3.478489   -1.048416
 C      1.955423    4.093101   -0.640051
 H      1.827141    5.080803   -1.081054
 C      3.184843    3.723249   -0.101804
 H      4.021310    4.420770   -0.120518
 C      3.343337    2.456058    0.460296
 H      4.303418    2.155451    0.880927
 C      2.276536    1.565702    0.477754
 H      2.407360    0.566426    0.896942
 C     -1.513027   -4.036220    0.602371
 C     -0.435460   -3.911380   -0.296918
 H     -0.539370   -4.236186   -1.329202
 C      0.791695   -3.365901    0.131703
 H      1.589355   -3.273308   -0.600847
 C      0.986983   -2.923833    1.467190
 C     -0.156404   -2.885390    2.282282
 H     -0.114109   -2.442041    3.274883
 C     -1.395696   -3.444125    1.856808
 H     -2.250251   -3.394237    2.528393
 H     -2.133714   -1.880692   -0.655978
 C      2.169024    0.020571   -2.408777
 C      3.159451   -0.802450   -1.876488
 C      2.490830    1.179089   -3.107429
 C      4.493227   -0.449711   -2.036666
 H      2.891343   -1.704380   -1.326857
 C      3.831351    1.522272   -3.266316
 H      1.701279    1.807089   -3.515620
 C      4.828516    0.713243   -2.729267
 H      5.274527   -1.085827   -1.623283
 H      4.094342    2.428555   -3.809374
 H     -2.424500   -0.035500    0.755848
 H     -1.954227   -0.583073    2.249467
 C     -3.588596   -0.988636   -1.228302
 O     -3.590134    0.175423   -0.734065
 Fe    -0.754214   -1.850621    0.408632
 C     -4.240770   -2.106432   -0.463158
 H     -3.079481    4.246534   -2.188964
 C     -3.423141    3.323753   -1.691269
 O     -2.755695    2.274843   -2.127773
 O     -4.305546    3.299461   -0.855869
 H     -3.080905    1.443803   -1.648357
 C      2.259422   -2.291505    1.875372
 C      2.294326   -1.311880    2.878776
 C      3.457290   -2.629324    1.231837
 C      3.482638   -0.669899    3.205007
 H      1.382176   -1.019523    3.397962
 C      4.646227   -1.988120    1.561827
 H      3.469741   -3.415119    0.476874
 C      4.662260   -0.998631    2.541265
 H      3.482238    0.100195    3.975165
 H      5.567386   -2.271021    1.054876
 H      5.592534   -0.491912    2.792886
 O     -4.521624   -3.197103   -0.931566
 O     -4.500452   -1.769104    0.808235
 H     -4.899628   -2.546981    1.244653
 C     -3.393974   -1.208220   -2.696444
 H     -2.593612   -0.555060   -3.064866
 H     -3.155025   -2.249215   -2.936050
 H     -4.323522   -0.934775   -3.219862
 H      5.874943    0.988041   -2.851899
 H     -2.467189   -4.437667    0.267121
83
TS2,3f-S Gsolv= -2549.702064
 O      0.825314   -1.611773   -2.418760
 O     -0.433973    0.531013   -2.752442
 S      0.567874   -0.227522   -1.975180
 N      0.236217   -0.246927   -0.398060
 C     -0.494638    0.940201    0.082514
 H     -1.448336    1.037289   -0.464838
 C     -0.855857    0.657865    1.541567
 H      0.070133    0.606122    2.134139
 N     -1.443912   -0.699565    1.565778
 C     -1.758008    1.724441    2.107825
 C     -1.256695    2.648859    3.025365
 H     -0.225752    2.554278    3.370314
 C     -2.055066    3.690972    3.488822
 H     -1.650308    4.405468    4.204304
 C     -3.365191    3.820541    3.036295
 H     -3.989464    4.637706    3.395065
 C     -3.874098    2.901067    2.121813
 H     -4.896198    2.996020    1.756108
 C     -3.075948    1.859206    1.660963
 H     -3.493606    1.149382    0.944933
 C      0.245979    2.250787   -0.048189
 C     -0.353069    3.319680   -0.714504
 H     -1.349563    3.186579   -1.143289
 C      0.312278    4.536580   -0.845955
 H     -0.165986    5.362275   -1.371415
 C      1.588725    4.692861   -0.313001
 H      2.114306    5.640826   -0.421049
 C      2.192960    3.629811    0.358121
 H      3.193908    3.742645    0.775092
 C      1.522862    2.419463    0.494692
 H      2.006160    1.587783    1.011760
 C     -0.435496   -4.302787    1.073374
 C      0.371099   -3.944710   -0.035763
 H      0.149883   -4.339644   -1.025496
 C      1.518169   -3.146182    0.151778
 H      2.158964   -2.930345   -0.699773
 C      1.821614   -2.604133    1.423869
 C      0.857405   -2.750328    2.435261
 H      0.991777   -2.247447    3.391920
 C     -0.237174   -3.649481    2.278239
 H     -0.925171   -3.795222    3.108462
 H     -1.617063   -2.435313   -0.193117
 C      2.116043    0.646251   -2.184194
 C      3.257956    0.130696   -1.573562
 C      2.156456    1.842068   -2.892002
 C      4.451974    0.835497   -1.659835
 H      3.213198   -0.809849   -1.023332
 C      3.357793    2.542770   -2.972101
 H      1.254046    2.227366   -3.362633
 C      4.500552    2.044564   -2.353505
 H      5.348311    0.439279   -1.183405
 H      3.396354    3.484551   -3.517385
 H     -2.352880   -0.689012    1.083678
 H     -1.621216   -0.991013    2.530781
 C     -3.458814   -2.201075   -0.593812
 O     -3.728403   -1.000827   -0.412175
 C     -2.846234   -2.662114   -1.903318
 Fe    -0.258297   -1.969069    0.623872
 O     -2.559387   -1.629508   -2.690060
 H     -2.124868   -1.961202   -3.500327
 O     -2.674009   -3.828771   -2.206931
 C     -3.965269   -3.260640    0.327755
 H     -5.042652   -3.387662    0.141577
 H     -3.472971   -4.224456    0.172574
 H     -3.844907   -2.937647    1.369448
 H     -4.207637    2.974503   -2.154279
 C     -4.303042    2.005747   -1.635973
 O     -3.361947    1.168268   -2.031560
 O     -5.165591    1.757541   -0.818567
 H     -3.460465    0.301919   -1.539019
 C      3.021789   -1.766032    1.607475
 C      2.977644   -0.581666    2.351421
 C      4.231850   -2.152873    1.018389
 C      4.114679    0.207928    2.486996
 H      2.040302   -0.260656    2.807709
 C      5.371867   -1.371529    1.171259
 H      4.282621   -3.082035    0.450430
 C      5.314221   -0.184817    1.898854
 H      4.060195    1.137374    3.052601
 H      6.309265   -1.690873    0.718276
 H      6.204352    0.432682    2.008440
 H      5.436127    2.598488   -2.413109
 H     -1.289193   -4.963050    0.935390
92
TS2,3g-R Gsolv= -2667.476004
 O     -0.678059   -1.438043   -2.612119
 O      0.391877    0.817502   -2.887696
 S      0.344901   -0.473624   -2.172534
 N      0.185103   -0.264978   -0.575075
 C      0.862988    0.928839   -0.031733
 H      0.520982    1.834584   -0.560581
 C      0.379927    1.043883    1.414804
 H      0.770891    0.184956    1.980089
 N     -1.087978    0.877831    1.356583
 C      0.844766    2.316664    2.070159
 C      1.860050    2.267829    3.026707
 H      2.263738    1.298714    3.328450
 C      2.364560    3.440041    3.582628
 H      3.156862    3.388522    4.328216
 C      1.858532    4.674274    3.183595
 H      2.254714    5.592272    3.615414
 C      0.844070    4.730900    2.230254
 H      0.445026    5.692177    1.907558
 C      0.339184    3.558791    1.676753
 H     -0.455207    3.619367    0.931878
 C      2.369954    0.886626   -0.094878
 C      3.071329    1.957756   -0.646306
 H      2.513572    2.804002   -1.056053
 C      4.464332    1.944351   -0.685821
 H      5.002639    2.784538   -1.122639
 C      5.165123    0.857002   -0.171637
 H      6.253839    0.843947   -0.204205
 C      4.469091   -0.217080    0.384086
 H      5.010524   -1.074161    0.785445
 C      3.080001   -0.200944    0.421293
 H      2.535629   -1.048111    0.842322
 C     -3.430842   -2.086687    0.614261
 C     -2.492340   -2.665772   -0.262881
 H     -2.763933   -2.900524   -1.289189
 C     -1.183631   -2.966869    0.164354
 H     -0.507122   -3.404821   -0.564146
 C     -0.745154   -2.720592    1.488982
 C     -1.621764   -1.967252    2.287336
 H     -1.317848   -1.616359    3.271769
 C     -2.936290   -1.646542    1.850335
 H     -3.576146   -1.060468    2.511076
 H     -2.607645    0.133704   -0.619131
 C      1.924338   -1.256468   -2.472797
 C      2.128545   -2.550138   -1.998093
 C      2.928885   -0.567572   -3.144224
 C      3.364339   -3.155986   -2.185790
 H      1.331826   -3.081015   -1.479219
 C      4.163406   -1.184600   -3.331350
 H      2.747940    0.441292   -3.509849
 C      4.382252   -2.471819   -2.848996
 H      3.531999   -4.167175   -1.818078
 H      4.957491   -0.652373   -3.852468
 H     -1.508923    1.651065    0.815273
 H     -1.495385    0.895873    2.295261
 C     -2.967869    1.810190   -1.166517
 O     -2.121204    2.605722   -0.663446
 C     -4.871851   -1.849258    0.245430
 H     -5.135208   -0.836144    0.590894
 C     -5.153638   -1.948331   -1.244695
 H     -6.189457   -1.646602   -1.446955
 H     -4.493103   -1.300880   -1.837962
 H     -5.034851   -2.980954   -1.604351
 C     -5.735855   -2.849072    1.017482
 H     -5.599666   -2.755413    2.103087
 H     -6.798096   -2.685756    0.791650
 H     -5.483081   -3.880299    0.729872
 Fe    -1.459908   -0.801294    0.407070
 C     -4.257271    1.578423   -0.425876
 H      0.842140    5.411345   -2.148949
 C     -0.003186    4.911013   -1.646861
 O     -0.172125    3.688762   -2.111135
 O     -0.679922    5.436846   -0.785508
 H     -0.939242    3.248658   -1.619429
 C      0.645327   -3.014966    1.896067
 C      1.272301   -2.294236    2.923373
 C      1.385450   -4.001784    1.230717
 C      2.600232   -2.533861    3.254595
 H      0.732947   -1.515943    3.461730
 C      2.713998   -4.241928    1.564263
 H      0.917619   -4.605745    0.453782
 C      3.329714   -3.504234    2.571782
 H      3.068982   -1.950836    4.046097
 H      3.267560   -5.018097    1.038085
 H      4.371591   -3.689042    2.828365
 O     -5.290222    1.201857   -0.949260
 O     -4.158242    1.864916    0.879704
 H     -5.031162    1.705334    1.289112
 C     -2.995750    1.560458   -2.642877
 H     -1.971766    1.423609   -3.010712
 H     -3.602408    0.691404   -2.916149
 H     -3.420130    2.448188   -3.137884
 H      5.350836   -2.947992   -2.993186
92
TS2,3g-S Gsolv= -2667.471369
 O     -0.442597   -1.302155   -2.612105
 O      0.620911    0.970772   -2.757082
 S      0.523561   -0.329820   -2.064979
 N      0.228114   -0.160423   -0.487403
 C      0.780536    1.072145    0.107265
 H      0.351823    1.956385   -0.395631
 C      0.277444    1.096269    1.550826
 H      0.727285    0.251409    2.094063
 N     -1.174716    0.823149    1.478248
 C      0.626701    2.384027    2.250851
 C      1.615406    2.395549    3.235848
 H      2.088667    1.456854    3.529274
 C      2.007271    3.591260    3.831523
 H      2.780192    3.585552    4.598925
 C      1.415001    4.790385    3.444675
 H      1.723640    5.726825    3.907273
 C      0.426499    4.787404    2.463013
 H     -0.040089    5.720439    2.147824
 C      0.033995    3.591607    1.870687
 H     -0.743105    3.607559    1.105676
 C      2.285474    1.198485    0.062980
 C      2.873032    2.346957   -0.466768
 H      2.231951    3.135949   -0.868043
 C      4.259496    2.483276   -0.497434
 H      4.706377    3.384095   -0.916333
 C      5.071187    1.467209   -0.000449
 H      6.155236    1.569967   -0.029286
 C      4.490390    0.316214    0.532051
 H      5.116671   -0.488227    0.919092
 C      3.107099    0.187639    0.567197
 H      2.655674   -0.720249    0.969279
 C     -3.419343   -2.171046    0.817891
 C     -2.611276   -2.585876   -0.266888
 H     -3.030120   -2.681063   -1.266565
 C     -1.265483   -2.958131   -0.067627
 H     -0.696228   -3.316612   -0.922465
 C     -0.662156   -2.892080    1.209865
 C     -1.381871   -2.206706    2.199532
 H     -0.924653   -1.989985    3.164113
 C     -2.750165   -1.872425    2.007473
 H     -3.290261   -1.394063    2.825140
 H     -2.710585    0.079383   -0.409409
 C      2.135949   -1.088125   -2.243044
 C      2.335040   -2.365408   -1.723906
 C      3.175876   -0.385671   -2.841940
 C      3.599778   -2.936965   -1.788034
 H      1.509832   -2.906990   -1.262228
 C      4.440677   -0.965993   -2.902066
 H      3.001028    0.610983   -3.242032
 C      4.653814   -2.235129   -2.372166
 H      3.762661   -3.935231   -1.383279
 H      5.262369   -0.419287   -3.362097
 H     -1.646543    1.609560    1.008030
 H     -1.569055    0.753240    2.420163
 C     -3.346355    1.837602   -0.743969
 O     -2.438667    2.637448   -0.432715
 C     -3.412221    1.287333   -2.151784
 C     -4.906935   -1.947558    0.717944
 H     -5.118707   -0.967739    1.178276
 C     -5.445199   -1.953966   -0.702933
 H     -6.516879   -1.714784   -0.692684
 H     -4.944867   -1.220482   -1.349663
 H     -5.337136   -2.947544   -1.162798
 C     -5.613008   -3.018925    1.552428
 H     -5.290700   -3.002502    2.601833
 H     -6.699891   -2.863220    1.527860
 H     -5.405884   -4.020864    1.148340
 Fe    -1.491612   -0.811572    0.428156
 O     -2.297378    1.542346   -2.828141
 H     -2.373280    1.148731   -3.719478
 O     -4.383891    0.724340   -2.621816
 C     -4.583935    1.727860    0.086926
 H     -5.173723    2.645418   -0.064008
 H     -5.205658    0.870379   -0.185709
 H     -4.315919    1.677559    1.149726
 H      0.525839    5.457465   -1.920877
 C     -0.326011    4.937061   -1.451973
 O     -0.467059    3.724100   -1.953691
 O     -1.031207    5.431755   -0.596343
 H     -1.233420    3.263193   -1.500516
 C      0.713781   -3.374216    1.425860
 C      1.604675   -2.700970    2.269752
 C      1.146048   -4.540823    0.780882
 C      2.904811   -3.165206    2.439390
 H      1.291165   -1.789826    2.780843
 C      2.439417   -5.014408    0.967962
 H      0.456219   -5.091606    0.141099
 C      3.326751   -4.321627    1.788904
 H      3.592126   -2.615347    3.081323
 H      2.755854   -5.928905    0.468338
 H      4.343834   -4.685608    1.925204
 H      5.645382   -2.682926   -2.416221
66
TS5,1a Gsolv= -1941.059692
 O      -1.322881   -2.792968   -1.010795
 O       0.396989   -1.782875   -2.524255
 S       0.034252   -2.226536   -1.157163
 N       0.205164   -1.066817   -0.043759
 C       1.346052   -0.166168   -0.280126
 H       1.357918    0.163581   -1.336010
 C       1.134887    1.099893    0.563044
 H       1.118823    0.810654    1.626791
 N      -0.203882    1.615747    0.248815
 C       2.250974    2.093464    0.341543
 C       3.184993    2.338411    1.349017
 H       3.085255    1.822131    2.305395
 C       4.237711    3.226114    1.142994
 H       4.957246    3.407012    1.940527
 C       4.368711    3.879603   -0.078701
 H       5.190509    4.575299   -0.242514
 C       3.442264    3.640378   -1.091694
 H       3.539763    4.146841   -2.051139
 C       2.392139    2.752271   -0.883940
 H       1.678069    2.570573   -1.690131
 C       2.678628   -0.812894    0.018891
 C       3.672830   -0.850349   -0.958343
 H       3.479567   -0.397139   -1.932603
 C       4.893853   -1.472433   -0.705232
 H       5.658698   -1.501326   -1.480339
 C       5.131031   -2.060592    0.533443
 H       6.082278   -2.552306    0.732702
 C       4.145219   -2.019655    1.518878
 H       4.326455   -2.478536    2.490196
 C       2.927313   -1.400155    1.262810
 H       2.149145   -1.390526    2.028132
 C      -3.616425    0.527279    0.679495
 C      -3.558784   -0.904760    0.644744
 H      -4.109667   -1.431702   -0.134747
 C      -2.769962   -1.620774    1.554638
 H      -2.687777   -2.702470    1.457065
 C      -1.908194   -0.946703    2.447671
 C      -1.992096    0.466011    2.506819
 H      -1.323947    1.006569    3.177031
 C      -2.886588    1.181759    1.689561
 H      -2.877647    2.270378    1.728006
 H      -0.436398    2.397136    0.863380
 C      -0.936095   -1.702034    3.291639
 H      -1.428774   -2.103501    4.188651
 H      -0.514708   -2.553967    2.740276
 H      -0.113779   -1.056697    3.625412
 C      -4.507945    1.249338   -0.299082
 H      -4.571637    0.608948   -1.194841
 C      -5.905916    1.376124    0.303668
 H      -6.594528    1.846488   -0.410999
 H      -6.318273    0.395741    0.579314
 H      -5.878836    2.000283    1.209596
 C      -3.974911    2.609275   -0.723869
 H      -2.954740    2.542886   -1.129287
 H      -4.620230    3.035006   -1.503601
 H      -3.965128    3.323192    0.112230
 H      -1.796414    0.070505   -1.151034
 C      -1.723952    0.355534   -2.678963
 O      -0.904819    1.215078   -2.783091
 O      -2.545985   -0.394594   -3.101581
 H      -0.233385    1.967687   -0.711575
 Fe     -1.570098   -0.119382    0.396296
 C       1.144474   -3.564627   -0.757051
 H       2.184435   -3.250578   -0.892863
 H       0.965741   -3.870309    0.279724
 H       0.909810   -4.388845   -1.440578
76
TS5,1b Gsolv= -2171.857489
 O       0.509062   -2.618041    1.125934
 O      -0.586240   -0.890054    2.571210
 S      -0.441020   -1.492818    1.227072
 N      -0.045325   -0.413497    0.088754
 C      -0.667613    0.909044    0.273883
 H      -0.539370    1.242234    1.321007
 C       0.097493    1.919986   -0.596823
 H      -0.029479    1.630166   -1.653084
 N       1.526875    1.777731   -0.292211
 C      -0.442323    3.317392   -0.403639
 C      -1.200392    3.923140   -1.406386
 H      -1.372850    3.387539   -2.341541
 C      -1.742798    5.191770   -1.219880
 H      -2.332051    5.650827   -2.012686
 C      -1.531528    5.870565   -0.023303
 H      -1.954116    6.863304    0.125308
 C      -0.776384    5.273926    0.984269
 H      -0.608735    5.798377    1.924163
 C      -0.236827    4.005647    0.796108
 H       0.344052    3.546347    1.599180
 C      -2.147174    0.941314   -0.042271
 C      -3.042867    1.509803    0.863577
 H      -2.665172    1.909909    1.806633
 C      -4.405869    1.561083    0.580133
 H      -5.092814    2.004876    1.299768
 C      -4.887938    1.035954   -0.615266
 H      -5.954023    1.066178   -0.837170
 C      -3.999160    0.467738   -1.527778
 H      -4.370456    0.052911   -2.464639
 C      -2.638158    0.425770   -1.244358
 H      -1.947023   -0.028439   -1.956469
 C       4.035502   -0.868960   -0.677261
 C       3.274080   -2.082748   -0.655049
 H       3.485856   -2.819423    0.120021
 C       2.227299   -2.296342   -1.560318
 H       1.612469   -3.190978   -1.468313
 C       1.829578   -1.278742   -2.458138
 C       2.613001   -0.101304   -2.514307
 H       2.308840    0.703372   -3.183474
 C       3.732428    0.073779   -1.680678
 H       4.267770    1.021741   -1.708650
 C      -2.033600   -2.160953    0.792110
 C      -2.132595   -2.941978   -0.357482
 C      -3.158319   -1.864529    1.553750
 C      -3.377497   -3.410635   -0.753806
 H      -1.241418   -3.180959   -0.939041
 C      -4.397694   -2.344121    1.145811
 H      -3.064581   -1.260366    2.454407
 C      -4.528409   -3.107887   -0.017353
 H      -3.463515   -4.020512   -1.653410
 H      -5.285519   -2.110860    1.734763
 C      -5.878171   -3.557289   -0.481741
 H      -6.525628   -3.829733    0.361503
 H      -6.386955   -2.748873   -1.028380
 H      -5.809620   -4.417226   -1.159123
 H       2.083372    2.347940   -0.930658
 C       0.620315   -1.444275   -3.317232
 H       0.863831   -2.020873   -4.221175
 H      -0.171626   -1.988974   -2.785832
 H       0.224354   -0.473371   -3.640508
 C       5.164428   -0.690807    0.306469
 H       4.892961   -1.272975    1.202965
 C       6.438580   -1.287969   -0.288455
 H       7.268284   -1.220986    0.427963
 H       6.303668   -2.345027   -0.555932
 H       6.730895   -0.741530   -1.197841
 C       5.389195    0.754138    0.726473
 H       4.468478    1.222212    1.104990
 H       6.142017    0.796817    1.524563
 H       5.765797    1.366701   -0.105343
 H       2.285032   -0.317247    1.140902
 C       2.321800    0.020706    2.655227
 O       1.978698    1.160669    2.722327
 O       2.706070   -1.006159    3.120324
 H       1.725653    2.103890    0.657150
 Fe      1.952157   -0.390083   -0.404117
75
TS5,1c Gsolv= -2337.002692
 O       0.260461   -2.513129    1.247651
 O      -0.465156   -0.563686    2.647120
 S      -0.424994   -1.210629    1.319403
 N       0.159221   -0.266445    0.158228
 C      -0.171842    1.162425    0.310863
 H       0.044935    1.490291    1.344731
 C       0.769926    1.961807   -0.603073
 H       0.567994    1.671052   -1.647002
 N       2.143291    1.529811   -0.308226
 C       0.538005    3.446983   -0.457159
 C      -0.068765    4.163699   -1.489342
 H      -0.347500    3.643198   -2.407247
 C      -0.326007    5.525252   -1.354810
 H      -0.799989    6.070001   -2.170302
 C       0.022328    6.186611   -0.180869
 H      -0.176890    7.251866   -0.072545
 C       0.626969    5.479338    0.856328
 H       0.899460    5.990476    1.778850
 C       0.881411    4.118486    0.720554
 H       1.346982    3.575628    1.546199
 C      -1.619721    1.481195    0.014052
 C      -2.376050    2.215198    0.927599
 H      -1.912734    2.546163    1.859157
 C      -3.710740    2.516478    0.665258
 H      -4.290249    3.087255    1.389785
 C      -4.303141    2.079564   -0.515919
 H      -5.348550    2.306507   -0.720861
 C      -3.552816    1.347473   -1.436228
 H      -4.011850    1.001367   -2.361809
 C      -2.218938    1.054729   -1.174349
 H      -1.637550    0.472382   -1.891668
 C       4.025593   -1.612416   -0.709013
 C       2.999898   -2.612734   -0.667395
 H       3.050612   -3.381244    0.104110
 C       1.914535   -2.573714   -1.550786
 H       1.109487   -3.300396   -1.443299
 C       1.748061   -1.489184   -2.442942
 C       2.787132   -0.531011   -2.519639
 H       2.666767    0.323675   -3.185140
 C       3.934077   -0.624778   -1.710855
 H       4.675835    0.171379   -1.754476
 C      -2.128372   -1.564512    0.883429
 C      -2.360784   -2.339469   -0.252711
 C      -3.171036   -1.050353    1.645740
 C      -3.663733   -2.592723   -0.646699
 H      -1.527031   -2.740746   -0.827861
 C      -4.481093   -1.298817    1.257529
 H      -2.962437   -0.456153    2.532476
 C      -4.699175   -2.060394    0.116443
 H      -3.880633   -3.190199   -1.527358
 H      -5.319137   -0.907162    1.827084
 H       2.799221    1.961227   -0.961029
 C       0.515927   -1.364022   -3.276129
 H       0.584401   -2.005308   -4.166521
 H      -0.374700   -1.678818   -2.715244
 H       0.369998   -0.332652   -3.620652
 C       5.180698   -1.704647    0.255692
 H       4.790998   -2.194922    1.163380
 C       6.260946   -2.599562   -0.349823
 H       7.094589   -2.728143    0.353438
 H       5.869392   -3.595159   -0.599774
 H       6.660623   -2.149834   -1.271198
 C       5.757106   -0.353613    0.652109
 H       4.983400    0.331519    1.029694
 H       6.505912   -0.486393    1.443967
 H       6.263457    0.136469   -0.191980
 H       2.521918   -0.628936    1.133318
 C       2.632298   -0.275909    2.630335
 O       2.532036    0.912103    2.678463
 O       2.795796   -1.348924    3.122056
 H       2.416708    1.818815    0.634727
 Fe      2.116797   -0.656753   -0.396829
 N      -6.074643   -2.317009   -0.298390
 O      -6.979162   -1.838783    0.371097
 O      -6.259166   -2.997623   -1.297420
73
TS5,1d Gsolv= -2231.816861
 O       0.500298   -2.609141    1.132952
 O      -0.637263   -0.895617    2.563813
 S      -0.458009   -1.490617    1.221028
 N      -0.055217   -0.407230    0.092902
 C      -0.682375    0.913239    0.276289
 H      -0.553870    1.249362    1.322452
 C       0.078374    1.925128   -0.596697
 H      -0.046393    1.632435   -1.652371
 N       1.508316    1.789722   -0.290438
 C      -0.468248    3.320235   -0.406243
 C      -1.229561    3.920135   -1.410059
 H      -1.399038    3.382117   -2.344364
 C      -1.778989    5.186042   -1.225524
 H      -2.370790    5.640544   -2.019052
 C      -1.571593    5.867868   -0.030003
 H      -1.999772    6.858441    0.117021
 C      -0.813257    5.277046    0.978572
 H      -0.648624    5.803848    1.917674
 C      -0.266764    4.011431    0.792461
 H       0.316390    3.556641    1.596427
 C      -2.161780    0.936279   -0.038732
 C      -3.060935    1.495980    0.868860
 H      -2.685667    1.897164    1.812401
 C      -4.424244    1.538733    0.585127
 H      -5.114318    1.977017    1.305120
 C      -4.902280    1.013164   -0.611487
 H      -5.968325    1.037993   -0.833695
 C      -4.010203    0.450545   -1.524295
 H      -4.378697    0.034946   -2.461713
 C      -2.649125    0.417732   -1.241163
 H      -1.954797   -0.030873   -1.953777
 C       4.032955   -0.844027   -0.666323
 C       3.274457   -2.059917   -0.644734
 H       3.486320   -2.795337    0.131496
 C       2.231663   -2.277883   -1.553707
 H       1.620162   -3.175016   -1.463532
 C       1.833247   -1.262090   -2.453089
 C       2.613267   -0.082204   -2.507491
 H       2.308365    0.721137   -3.177930
 C       3.730462    0.096550   -1.671781
 H       4.263402    1.045876   -1.699480
 C      -2.037896   -2.177959    0.760521
 C      -2.103859   -2.964319   -0.389291
 C      -3.175426   -1.897381    1.509800
 C      -3.327348   -3.469588   -0.803701
 H      -1.201169   -3.184281   -0.959444
 C      -4.405245   -2.402479    1.101997
 H      -3.102990   -1.285231    2.406420
 C      -4.454202   -3.171530   -0.049365
 H      -3.420580   -4.087796   -1.693585
 H      -5.317755   -2.203348    1.659547
 H       2.062834    2.360553   -0.930106
 C       0.627486   -1.431380   -3.316377
 H       0.876344   -2.006080   -4.220067
 H      -0.164363   -1.979549   -2.788515
 H       0.228980   -0.461659   -3.640017
 C       5.157757   -0.660761    0.321122
 H       4.886642   -1.245234    1.216214
 C       6.437025   -1.250194   -0.270515
 H       7.264060   -1.179373    0.448601
 H       6.308786   -2.307680   -0.539571
 H       6.729162   -0.701120   -1.178361
 C       5.372920    0.785088    0.743162
 H       4.448409    1.247158    1.119843
 H       6.123464    0.831397    1.543186
 H       5.747877    1.400841   -0.087023
 H       2.278679   -0.298332    1.145770
 C       2.298526    0.036895    2.658985
 O       1.943508    1.173292    2.725588
 O       2.686179   -0.987785    3.126267
 H       1.704760    2.119741    0.658098
 Fe      1.946997   -0.372475   -0.398993
 F      -5.635952   -3.654200   -0.449378
61
TS5,1e Gsolv= -1975.560688
 O       1.881332   -2.244236    1.012684
 O       0.078089   -1.270256    2.458822
 S       0.543523   -1.627432    1.100576
 N       0.513322   -0.382025    0.077897
 C      -0.601074    0.556946    0.277033
 H      -0.652411    0.860859    1.339154
 C      -0.295096    1.828230   -0.531462
 H      -0.293391    1.562407   -1.601013
 N       1.074996    2.250746   -0.205853
 C      -1.346418    2.885626   -0.291702
 C      -2.260292    3.208279   -1.295790
 H      -2.188137    2.708705   -2.263398
 C      -3.261609    4.149216   -1.071019
 H      -3.966878    4.389378   -1.865622
 C      -3.359851    4.779790    0.165745
 H      -4.142098    5.516191    0.344453
 C      -2.452730    4.463662    1.175088
 H      -2.525569    4.950979    2.146534
 C      -1.454468    3.521877    0.948801
 H      -0.757460    3.277767    1.753168
 C      -1.949423   -0.007603   -0.111193
 C      -3.017785    0.050640    0.782922
 H      -2.864733    0.497159    1.767456
 C      -4.265323   -0.462208    0.433646
 H      -5.090240   -0.412608    1.143379
 C      -4.452313   -1.044780   -0.816118
 H      -5.423937   -1.453914   -1.090046
 C      -3.389052   -1.105458   -1.717178
 H      -3.529007   -1.562979   -2.696175
 C      -2.148013   -0.585257   -1.368027
 H      -1.314051   -0.645349   -2.070403
 C       4.410467    0.851201   -0.845762
 C       4.215872   -0.560508   -0.764924
 H       4.755505   -1.135709   -0.015990
 C       3.307383   -1.189320   -1.627136
 H       3.121260   -2.256310   -1.531303
 C       2.498303   -0.408655   -2.475207
 C       2.703916    0.985326   -2.568936
 H       2.063596    1.582654   -3.214510
 C       3.705927    1.602932   -1.799353
 H       3.832961    2.682739   -1.835014
 C      -0.588633   -2.859187    0.476593
 C      -0.295862   -3.458661   -0.747616
 C      -1.737462   -3.185827    1.187223
 C      -1.177966   -4.396604   -1.268503
 H       0.609029   -3.185761   -1.291944
 C      -2.615486   -4.127820    0.655982
 H      -1.943824   -2.704763    2.141600
 C      -2.338176   -4.727917   -0.568529
 H      -0.960930   -4.871634   -2.223760
 H      -3.520311   -4.389598    1.202095
 H       1.354566    3.032298   -0.800281
 H       2.669859    0.631821    1.123496
 C       2.434268    0.790730    2.613441
 O       1.656155    1.691386    2.725916
 O       3.151754   -0.039482    3.083271
 H       1.129648    2.569301    0.765120
 Fe      2.318678    0.457235   -0.425872
 H      -3.028666   -5.461296   -0.982031
 H       5.113083    1.335783   -0.172686
 H       1.698656   -0.875540   -3.046791
71
TS5,1f Gsolv= -2206.363240
 O       2.056373    1.461000   -2.045562
 O       0.209330    0.234153   -3.219350
 S       0.681445    0.927392   -2.001195
 N       0.553637    0.018773   -0.671691
 C      -0.621773   -0.867511   -0.638427
 H      -0.670009   -1.469530   -1.565247
 C      -0.417783   -1.855325    0.520957
 H      -0.383708   -1.272120    1.453889
 N       0.910044   -2.464086    0.363325
 C      -1.559179   -2.837128    0.614240
 C      -2.470748   -2.737671    1.666384
 H      -2.325489   -1.966094    2.425820
 C      -3.560798   -3.599302    1.747120
 H      -4.264231   -3.508432    2.573791
 C      -3.749466   -4.574425    0.771915
 H      -4.601099   -5.250745    0.831292
 C      -2.844000   -4.682368   -0.281798
 H      -2.987810   -5.442315   -1.048857
 C      -1.756266   -3.818214   -0.361739
 H      -1.058671   -3.905321   -1.197914
 C      -1.935015   -0.134054   -0.482272
 C      -2.998226   -0.401857   -1.343109
 H      -2.863982   -1.127392   -2.147862
 C      -4.218807    0.252418   -1.186951
 H      -5.040379    0.036482   -1.868951
 C      -4.385138    1.183112   -0.165557
 H      -5.337256    1.698169   -0.044132
 C      -3.325806    1.455760    0.700378
 H      -3.445369    2.186355    1.501084
 C      -2.110456    0.800556    0.541596
 H      -1.277783    1.025552    1.209526
 C       4.375277   -0.960248    0.587874
 C       4.131406    0.408185    0.295481
 H       4.644607    0.883472   -0.536945
 C       3.155652    1.113831    1.006425
 H       2.911346    2.120625    0.676190
 C       2.373773    0.486847    2.015820
 C       2.691946   -0.857679    2.343282
 H       2.119535   -1.380885    3.105601
 C       3.691376   -1.563302    1.660696
 H       3.857194   -2.614331    1.886175
 C      -0.377356    2.348689   -1.783686
 C      -0.066661    3.253662   -0.770131
 C      -1.491030    2.524291   -2.596488
 C      -0.899338    4.345569   -0.560579
 H       0.812237    3.098451   -0.143002
 C      -2.317028    3.624895   -2.381270
 H      -1.709709    1.805856   -3.384412
 C      -2.024905    4.528743   -1.363881
 H      -0.668883    5.058188    0.229916
 H      -3.193787    3.772160   -3.009754
 H       1.125066   -3.058968    1.164589
 H       2.640322   -1.392812   -1.307857
 C       2.379188   -1.942954   -2.692699
 O       1.525927   -2.771424   -2.564987
 O       3.161215   -1.343087   -3.367052
 H       0.940610   -3.050661   -0.474670
 Fe      2.273614   -0.752601    0.115099
 H      -2.676353    5.384828   -1.195518
 C       1.253136    1.197470    2.670238
 C       0.255810    0.497657    3.367788
 C       1.138367    2.592227    2.584754
 C      -0.826050    1.163305    3.930971
 H       0.301458   -0.586123    3.463458
 C       0.054187    3.257660    3.146974
 H       1.911744    3.179804    2.092644
 C      -0.937422    2.546864    3.816890
 H      -1.591145    0.592590    4.455662
 H      -0.006732    4.342181    3.069407
 H      -1.787062    3.067986    4.255102
 H       5.098513   -1.523793    0.004500
80
TS5,1g Gsolv= -2324.139418
 O     -0.478561   -1.881053   -2.138299
 O      0.617790    0.187620   -3.032338
 S      0.488353   -0.784195   -1.924422
 N      0.125788   -0.101057   -0.509976
 C      0.697832    1.240315   -0.309165
 H      0.472859    1.885063   -1.179391
 C     -0.018178    1.866730    0.896943
 H      0.186438    1.240461    1.780495
 N     -1.463247    1.776004    0.645071
 C      0.477724    3.266863    1.170162
 C      1.239109    3.529338    2.309767
 H      1.453789    2.716509    3.005781
 C      1.727094    4.808898    2.561184
 H      2.317651    4.997112    3.456937
 C      1.458963    5.843723    1.670098
 H      1.837789    6.846191    1.864385
 C      0.703005    5.591143    0.527183
 H      0.491998    6.395653   -0.176215
 C      0.217305    4.311770    0.277796
 H     -0.366735    4.128356   -0.626486
 C      2.197823    1.234413   -0.115549
 C      3.009724    2.055154   -0.897750
 H      2.550872    2.694227   -1.654716
 C      4.392919    2.055210   -0.728037
 H      5.014929    2.698992   -1.348813
 C      4.977576    1.228246    0.226441
 H      6.059037    1.221319    0.356479
 C      4.172288    0.406286    1.014989
 H      4.621874   -0.247746    1.762314
 C      2.792684    0.414100    0.846282
 H      2.165780   -0.242019    1.451334
 C     -3.974800   -0.625294    0.338110
 C     -3.405383   -1.758298   -0.330743
 H     -3.783771   -2.031145   -1.316256
 C     -2.362769   -2.495534    0.244717
 H     -1.916547   -3.303782   -0.331018
 C     -1.729760   -2.050150    1.425569
 C     -2.301572   -0.930682    2.094124
 H     -1.854497   -0.569739    3.018605
 C     -3.459197   -0.304179    1.605857
 H     -3.850480    0.558244    2.144599
 C      2.079068   -1.570348   -1.731871
 C      2.187533   -2.614539   -0.813644
 C      3.177827   -1.122657   -2.455864
 C      3.426461   -3.210256   -0.614653
 H      1.313083   -2.955431   -0.254575
 C      4.415471   -1.726805   -2.246983
 H      3.066174   -0.308094   -3.169268
 C      4.539552   -2.763727   -1.327014
 H      3.524684   -4.027558    0.098787
 H      5.284639   -1.382001   -2.804755
 H     -1.985321    2.078341    1.468830
 C     -5.144190    0.091390   -0.288971
 H     -5.097110   -0.121349   -1.370242
 C     -6.441404   -0.496227    0.263368
 H     -7.312472   -0.040923   -0.226578
 H     -6.491048   -1.582634    0.106669
 H     -6.521709   -0.304769    1.344020
 C     -5.105117    1.601307   -0.103932
 H     -4.188011    2.038469   -0.523571
 H     -5.960962    2.061347   -0.615734
 H     -5.169382    1.887708    0.955770
 H     -2.215490    0.365104   -1.396497
 C     -2.338356    1.143152   -2.728972
 O     -1.996044    2.250032   -2.449828
 O     -2.744686    0.302955   -3.467644
 H     -1.728596    2.400355   -0.121400
 Fe    -1.859616   -0.307641   -0.023644
 H      5.509600   -3.230692   -1.163807
 C     -0.509715   -2.712336    1.926756
 C      0.461334   -1.992351    2.635284
 C     -0.284386   -4.072172    1.676570
 C      1.630758   -2.609556    3.063847
 H      0.316174   -0.929892    2.832926
 C      0.882871   -4.690207    2.112612
 H     -1.037428   -4.661671    1.154795
 C      1.847224   -3.960679    2.803287
 H      2.380080   -2.027541    3.599739
 H      1.035766   -5.750019    1.914630
 H      2.763019   -4.443988    3.140169
